# Supplementary material for: Chiral phosphoric acid-catalyzed dual-ring formation for enantioselective construction of N–N axially chiral 3,3′-bisquinazolinones
Source: Royal Society of Chemistry journal article supplement (doi:10.1039/d2cc05172a), 2022-01-01

*Supplementary Information*

**Chiral phosphoric acid-catalyzed dual ring formation for  
enantioselective construction of N–N axially chiral 3,3’-  
bisquinazolinones**

XXX,<sup>†a</sup> XXX,<sup>†a</sup> XXX<sup>\*,b</sup> and XX<sup>\*,a</sup>

<sup>a</sup> XXXX

<sup>b</sup> XXXX

*E-mail: XXX*

## Table of Contents

|                                                                                                |            |
|------------------------------------------------------------------------------------------------|------------|
| <b>1. General Considerations</b>                                                               | <b>S3</b>  |
| <b>2. Experimental Procedures</b>                                                              | <b>S4</b>  |
| <b>3. Synthetic applications</b>                                                               | <b>S25</b> |
| <b>4. One-mmol-scale synthesis of compound 3aa</b>                                             | <b>S28</b> |
| <b>5. Synthesis of Substrates</b>                                                              | <b>S28</b> |
| <b>6. References</b>                                                                           | <b>S31</b> |
| <b>7. Copies of the <math>^1\text{H}</math> NMR and <math>^{13}\text{C}</math> NMR Spectra</b> | <b>S32</b> |

## 1. General Considerations

All chemicals were used as received without further purification unless stated otherwise.  $^1\text{H}$  NMR and  $^{13}\text{C}$  NMR spectra were recorded at ambient temperature on a 500 MHz spectrometer (125 MHz for  $^{13}\text{C}$ ). NMR experiments are reported in  $\delta$  units, parts per million (ppm), and were referenced to  $\text{CDCl}_3$  ( $\delta$  7.26 or 77.0 ppm) and  $\text{DMSO}_{d-6}$  ( $\delta$  2.5 or 36.5 ppm) as the internal standard. The coupling constants  $J$  are given in Hz. Column chromatography was performed using EM Silica gel 60 (300-400 meshes) or neutral aluminum oxide (200-300 meshes).

## 2. Experimental Procedures.

### 2.1 General procedure

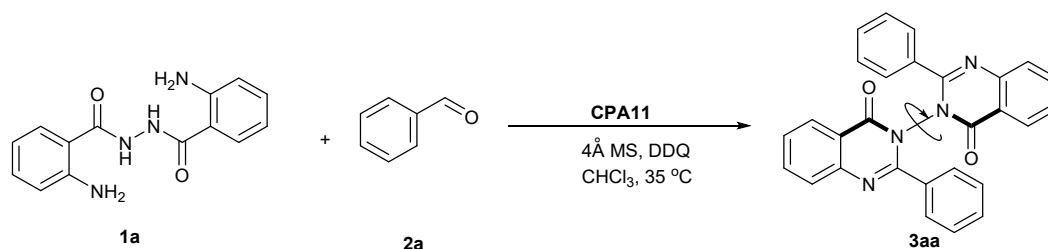

An oven-dried 25 mL Schlenk tube charged with **1a** (0.1 mmol), CPA (0.01 mmol, 6.1 mg), and DDQ (0.28 mmol, 63.5 mg), 4Å MS (400 mg), 4 mL of CHCl<sub>3</sub> added by syringe and benzaldehyde (0.2 mmol, 20  $\mu$ L) added by pipette. After 24 h, **2a** (0.2 mmol) was added to the reaction mixture. After 36 h, **2a** (0.2 mmol) was added to the reaction mixture. After 48 h, **2a** (0.2 mmol) was added to the reaction mixture. Then, the tube was vacuumed and refilled with Ar for 3 times and was placed in 35 °C oil-bath for 60 h. The crude reaction mixture was concentrated in vacuo and the residue was purified by silica gel flash column chromatography to afford the corresponding products.

### 2.2 Stability on racemization of product **3ba**

We investigated the racemization temperature of this axially chiral 6,6'-difluoro-2,2'-diphenyl-4*H*,4'*H*-[3,3'-biquinazoline]-4,4'-dione scaffold.

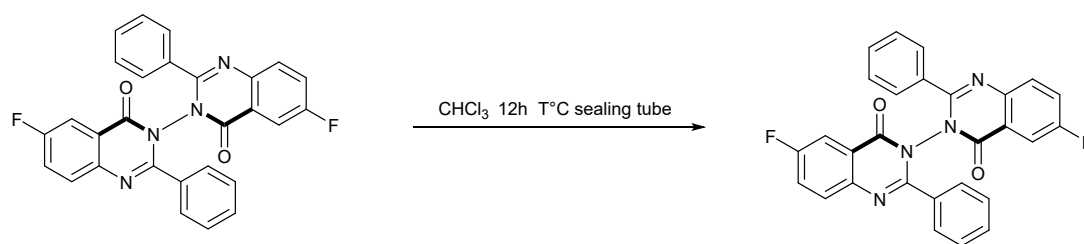

**3ba**, 92%ee

| entry | T / (°C) | Time (h) | ee of recovered <b>3ba</b> (%) |
|-------|----------|----------|--------------------------------|
| 1     | 80       | 12       | 92                             |
| 2     | 90       | 12       | 92                             |
| 3     | 100      | 12       | 91                             |
| 4     | 110      | 12       | 92                             |
| 5     | 120      | 12       | 91                             |

|   |     |    |    |
|---|-----|----|----|
| 6 | 130 | 12 | 91 |
| 7 | 140 | 12 | 92 |
| 8 | 150 | 24 | 92 |

### 2.3 Characterization Data for the Products

#### (*S*)-2,2'-diphenyl-4*H*,4'*H*-[3,3'-biquinazoline]-4,4'-dione (3aa)

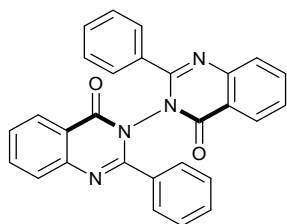

Flash column chromatography on silica gel gave the product (40.2 mg, 91% yield) as a white solid: M.p. 187-189 °C;  $[\alpha]_D^{25} = +130.7$  ( $c = 0.12$  in  $\text{CHCl}_3$ , 96:4 e.r.); The enantiomeric ratio was determined by Daicel Chiralcel AD-H (0.46 cm  $\times$  25 cm), Hexanes/IPA = 80/20,  $\lambda = 254$  nm,  $t$  (major) = 40.1 min,  $t$  (minor) = 61 min;  $^1\text{H NMR}$  ( $\text{CDCl}_3$ , 500 MHz)  $\delta$  8.40 (d,  $J = 7.5$  Hz, 2H), 7.82 (t,  $J = 8.0$  Hz, 2H), 7.72 (d,  $J = 8.0$  Hz, 2H), 7.58 (t,  $J = 7.5$  Hz, 2H), 7.36 (t,  $J = 7.5$  Hz, 2H), 7.26–7.23 (m, 8H);  $^{13}\text{C NMR}$  ( $\text{CDCl}_3$ , 125 MHz)  $\delta$  159.8, 154.0, 146.6, 135.5, 135.5, 132.2, 130.8, 130.8, 128.3, 128.3, 128.1, 127.8, 127.7, 120.8; HRMS (ESI)  $m/z$  calcd for  $\text{C}_{28}\text{H}_{19}\text{N}_4\text{O}_2^+$  ( $\text{M}+\text{H}$ ) $^+$  443.1503, found 443.1501.

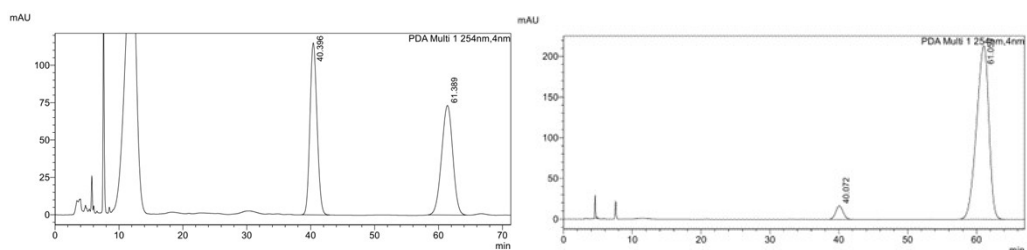

| PDA Ch1 254nm |           |          |         | PDA Ch1 254nm |           |          |         |
|---------------|-----------|----------|---------|---------------|-----------|----------|---------|
| Peak#         | Ret. Time | Area     | Area%   | Peak#         | Ret. Time | Area     | Area%   |
| 1             | 40.396    | 8868863  | 49.914  | 1             | 40.072    | 1229897  | 4.420   |
| 2             | 61.389    | 8899351  | 50.086  | 2             | 61.059    | 26594982 | 95.580  |
| 总计            |           | 17768214 | 100.000 | 总计            |           | 27824879 | 100.000 |

#### (*S*)-6,6'-difluoro-2,2'-diphenyl-4*H*,4'*H*-[3,3'-biquinazoline]-4,4'-dione (3ba)

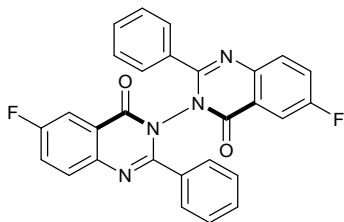

Flash column chromatography on silica gel gave the product (28.7 mg, 60% yield) as a white solid: M.p. 205-206 °C;  $[\alpha]_D^{25} = +195.0$  ( $c = 0.12$  in  $\text{CHCl}_3$ , 96:4 e.r.); The enantiomeric ratio was determined by Daicel Chiralcel AD-H (0.46 cm  $\times$  25 cm), Hexanes/IPA = 70/30, 1.0 mL/min,  $\lambda = 254$  nm,  $t$  (major) = 25.4 min,  $t$  (minor) = 30.2 min;  $^1\text{H}$  NMR ( $\text{CDCl}_3$ , 500 MHz)  $\delta$  8.02 (d,  $J = 4.0$  Hz, 2H), 7.72 (d,  $J = 4.5$  Hz, 2H), 7.54 (t,  $J = 7.5$  Hz, 2H), 7.39 (t,  $J = 7.5$  Hz, 2H), 7.25 (d,  $J = 5.0$  Hz, 4H), 7.20 (s, 4H);  $^{13}\text{C}$  NMR (125 MHz,  $\text{CDCl}_3$ )  $\delta$  161.3 (d,  $J = 250$  Hz), 159.1, 159.0, 153.1, 153.1, 143.2, 131.8, 130.9, 130.7 (d,  $J = 8.7$  Hz), 128.3, 128.1, 124.1 (d,  $J = 23.7$  Hz), 122.1 (d,  $J = 8.7$  Hz), 112.7 (d,  $J = 23.7$  Hz);  $^{19}\text{F}$  NMR (471 MHz  $\text{CDCl}_3$ )  $\delta$  -110.5; HRMS (ESI)  $m/z$  calcd for  $\text{C}_{28}\text{H}_{17}\text{F}_2\text{N}_4\text{O}_2^+$  ( $\text{M}+\text{H}$ ) $^+$  479.1314, found 479.1323.

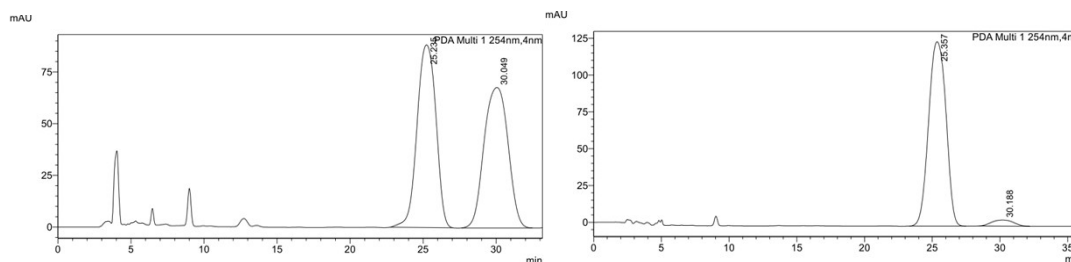

| PDA Ch1 254nm |           |          |        |         | PDA Ch1 254nm |           |          |        |         |
|---------------|-----------|----------|--------|---------|---------------|-----------|----------|--------|---------|
| Peak#         | Ret. Time | Area     | Height | Area%   | Peak#         | Ret. Time | Area     | Height | Area%   |
| 1             | 25.235    | 7939779  | 88324  | 50.551  | 1             | 25.357    | 11165266 | 125249 | 96.057  |
| 2             | 30.049    | 7766703  | 67900  | 49.449  | 2             | 30.188    | 458302   | 4093   | 3.943   |
| 总计            |           | 15706482 | 156224 | 100.000 | 总计            |           | 11623568 | 129342 | 100.000 |

### (S)-6,6'-dichloro-2,2'-diphenyl-4H,4'H-[3,3'-biquinazoline]-4,4'-dione (3ca)

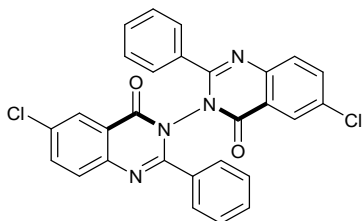

Flash column chromatography on silica gel gave the product (40.8 mg, 80% yield) as a white solid: M.p. 200-202 °C;  $[\alpha]_D^{25} = +61.3$  ( $c = 0.14$  in  $\text{CHCl}_3$ , 87:13 e.r.); The enantiomeric ratio was

determined by Daicel Chiralcel AD-H (0.46 cm × 25 cm), Hexanes/IPA = 70/30, 1.0 mL/min,  $\lambda$  = 254 nm, t (major) = 28.3 min, t (minor) = 47.1 min;  $^1\text{H}$  NMR ( $\text{CDCl}_3$ , 500 MHz)  $\delta$  8.33 (s, 2H), 7.74 (d,  $J$  = 8.5 Hz, 2H), 7.64 (d,  $J$  = 8.5 Hz, 2H), 7.38 (t,  $J$  = 7.5 Hz, 2H), 7.30 (d,  $J$  = 7.5 Hz, 4H), 7.17 (d,  $J$  = 7.5 Hz, 4H);  $^{13}\text{C}$  NMR (125 MHz,  $\text{CDCl}_3$ )  $\delta$  158.7, 154.0, 145.0, 136.0, 133.9, 131.7, 131.0, 129.8, 129.8, 128.4, 128.0, 126.9, 126.9, 121.7; HRMS (ESI)  $m/z$  calcd for  $\text{C}_{28}\text{H}_{17}\text{Cl}_2\text{N}_4\text{O}_2^+$  ( $\text{M}+\text{H}$ ) $^+$  511.0723, found 511.0724.

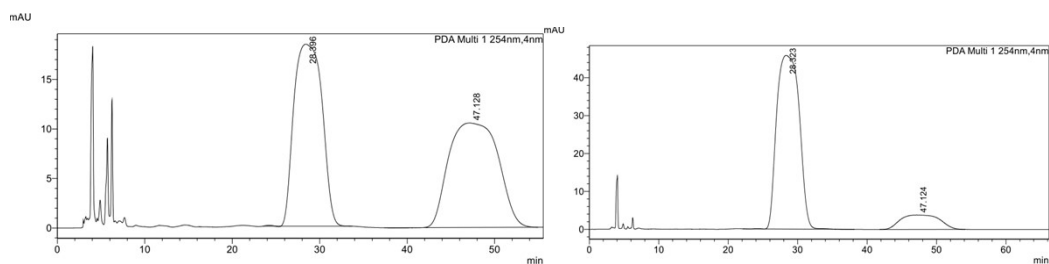

| PDA Ch1 254nm |           |         |        |         | PDA Ch1 254nm |           |          |        |         |
|---------------|-----------|---------|--------|---------|---------------|-----------|----------|--------|---------|
| Peak#         | Ret. Time | Area    | Height | Area%   | Peak#         | Ret. Time | Area     | Height | Area%   |
| 1             | 28.396    | 4136295 | 18380  | 49.819  | 1             | 28.323    | 10368618 | 45829  | 87.382  |
| 2             | 47.128    | 4166294 | 10549  | 50.181  | 2             | 47.124    | 1497291  | 3798   | 12.618  |
| 总计            |           | 8302589 | 28929  | 100.000 | 总计            |           | 11865909 | 49627  | 100.000 |

### (S)-6,6'-dibromo-2,2'-diphenyl-4H,4'H-[3,3'-biquinazoline]-4,4'-dione (3da)

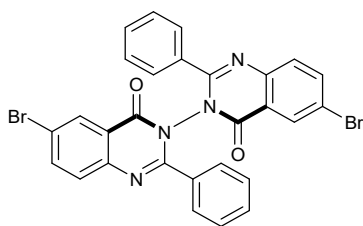

Flash column chromatography on silica gel gave the product (47.2 mg, 79% yield) as a white solid: M.p. 189-190 °C;  $[\alpha]_{\text{D}}^{25} = +96.3$  (c = 0.19 in  $\text{CHCl}_3$ , 97:3 e.r.); The enantiomeric ratio was determined by Daicel Chiralcel AD-H (0.46 cm × 25 cm), Hexanes/IPA = 70/30, 1.0 mL/min,  $\lambda$  = 254 nm, t (major) = 35.8 min, t (minor) = 58.9 min;  $^1\text{H}$  NMR ( $\text{CDCl}_3$ , 500 MHz)  $\delta$  8.50 (s, 2H), 7.88 (d,  $J$  = 8.5 Hz, 2H), 7.57 (d,  $J$  = 8.5 Hz, 2H), 7.38 (t,  $J$  = 7.5 Hz, 2H), 7.24 (d,  $J$  = 8.5 Hz, 4H), 7.17 (d,  $J$  = 7.5 Hz, 4H);  $^{13}\text{C}$  NMR (125 MHz,  $\text{CDCl}_3$ )  $\delta$  158.5, 154.1, 145.3, 138.8, 131.7, 131.1, 130.1, 130.0, 130.0, 128.4, 128.0, 128.0, 122.0, 121.6; HRMS (ESI)  $m/z$  calcd for  $\text{C}_{28}\text{H}_{17}\text{Br}_2\text{N}_4\text{O}_2^+$  ( $\text{M}+\text{H}$ ) $^+$  598.9713, found 598.9724.

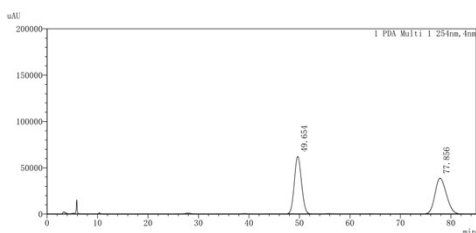

| PDA Ch1 254nm |           |          |        |         |
|---------------|-----------|----------|--------|---------|
| Peak#         | Ret. Time | Area     | Height | Area%   |
| 1             | 49.654    | 6122027  | 62041  | 50.332  |
| 2             | 77.856    | 6041150  | 38504  | 49.668  |
| 总计            |           | 12163178 | 100546 | 100.000 |

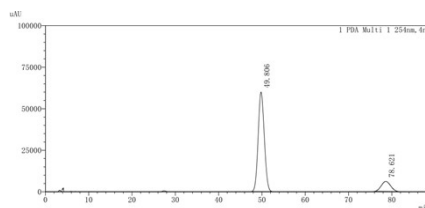

| PDA Ch1 254nm |           |         |        |         |
|---------------|-----------|---------|--------|---------|
| Peak#         | Ret. Time | Area    | Height | Area%   |
| 1             | 49.806    | 5911252 | 59908  | 86.816  |
| 2             | 78.621    | 897670  | 6016   | 13.184  |
| 总计            |           | 6808922 | 65924  | 100.000 |

### (S)-6,6'-dimethyl-2,2'-diphenyl-4H,4'H-[3,3'-biquinazoline]-4,4'-dione (3ea)

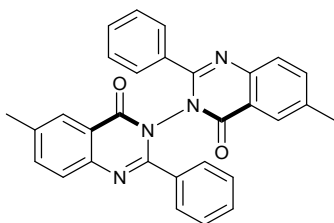

Flash column chromatography on silica gel gave the product (8.5 mg, 18% yield) as a white solid: M.p. 217-219 °C;  $[\alpha]_D^{25} = +52.5$  (c = 0.16 in CHCl<sub>3</sub>, 89:11 e.r.); The enantiomeric ratio was determined by Daicel Chiralcel OD-H (0.46 cm × 25 cm), Hexanes/IPA = 80/20, 1.0 mL/min,  $\lambda = 254$  nm, t (major) = 25.9 min, t (minor) = 10.1 min; <sup>1</sup>H NMR (CDCl<sub>3</sub>, 500 MHz)  $\delta$  8.12 (s, 2H), 7.62 (s, 4H), 7.35 (s, 2H), 7.21 (s, 8H); <sup>13</sup>C NMR (125 MHz, CDCl<sub>3</sub>)  $\delta$  159.8, 153.2, 144.6, 138.2, 136.9, 136.9, 132.3, 130.6, 128.2, 128.2, 127.9, 127.9, 127.1, 120.6, 21.4; HRMS (ESI) m/z calcd for C<sub>30</sub>H<sub>23</sub>N<sub>4</sub>O<sub>2</sub><sup>+</sup> (M+H)<sup>+</sup> 471.1816, found 471.1823.

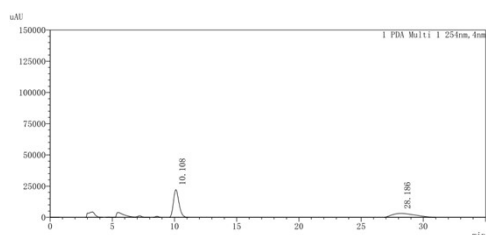

| PDA Ch1 254nm |           |         |        |         |
|---------------|-----------|---------|--------|---------|
| Peak#         | Ret. Time | Area    | Height | Area%   |
| 1             | 10.108    | 696603  | 22312  | 48.958  |
| 2             | 28.186    | 726249  | 4196   | 51.042  |
| 总计            |           | 1422852 | 26508  | 100.000 |

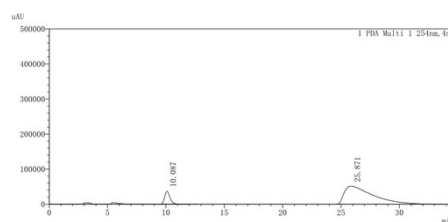

| PDA Ch1 254nm |           |          |        |         |
|---------------|-----------|----------|--------|---------|
| Peak#         | Ret. Time | Area     | Height | Area%   |
| 1             | 10.807    | 1170069  | 36862  | 11.200  |
| 2             | 25.871    | 9277089  | 52237  | 88.800  |
| 总计            |           | 10447158 | 89099  | 100.000 |

### (S)-7,7'-dichloro-2,2'-diphenyl-4H,4'H-[3,3'-biquinazoline]-4,4'-dione (3fa)



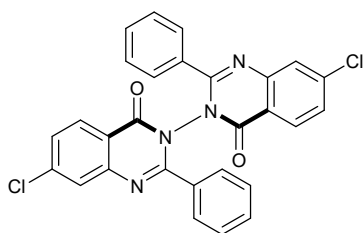

Flash column chromatography on silica gel gave the product (35.7 mg, 70% yield) as a white solid: M.p. 285-286 °C;  $[\alpha]_D^{25} = +208.3$  ( $c = 0.14$  in  $\text{CHCl}_3$ , 84:16 e.r.); The enantiomeric ratio was determined by Daicel Chiralcel AD-H (0.46 cm  $\times$  25 cm), Hexanes/IPA = 80/20, 1.0 mL/min,  $\lambda = 254$  nm,  $t$  (major) = 31.7 min,  $t$  (minor) = 16.5 min;  $^1\text{H}$  NMR ( $\text{CDCl}_3$ , 500 MHz)  $\delta$  8.32 (d,  $J = 8.5$  Hz, 2H), 7.71 (s, 2H), 7.53 (d,  $J = 8.5$  Hz, 2H), 7.40 (t,  $J = 7.5$  Hz, 2H), 7.25 (s, 4H), 7.18 (d,  $J = 7.5$  Hz, 4H);  $^{13}\text{C}$  NMR (125 MHz,  $\text{CDCl}_3$ )  $\delta$  159.1, 155.1, 147.4, 142.0, 131.7, 131.1, 129.0, 128.5, 128.4, 128.4, 128.0, 127.9, 127.9, 119.1; HRMS (ESI)  $m/z$  calcd for  $\text{C}_{28}\text{H}_{17}\text{Cl}_2\text{N}_4\text{O}_2^+$  ( $\text{M}+\text{H}$ ) $^+$  511.0723, found 511.0730.

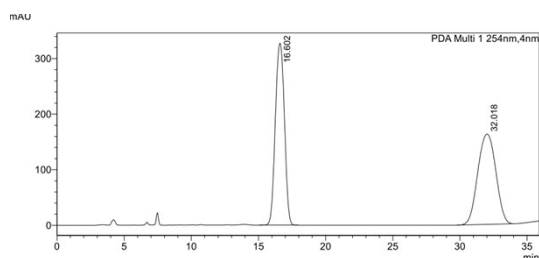

| PDA Ch1 254nm |           |          |        |         |
|---------------|-----------|----------|--------|---------|
| Peak#         | Ret. Time | Area     | Height | Area%   |
| 1             | 16.602    | 15383956 | 327569 | 50.318  |
| 2             | 32.018    | 15189670 | 162603 | 49.682  |
| 总计            |           | 30573626 | 490172 | 100.000 |

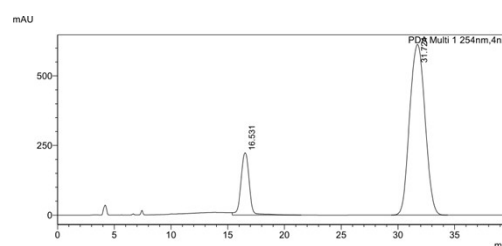

| PDA Ch1 254nm |           |          |        |         |
|---------------|-----------|----------|--------|---------|
| Peak#         | Ret. Time | Area     | Height | Area%   |
| 1             | 16.531    | 11400024 | 223401 | 16.456  |
| 2             | 31.724    | 57875472 | 612961 | 83.544  |
| 总计            |           | 69275495 | 836362 | 100.000 |

**(S)-2-(6-nitrocyclohexa-2,4-dien-1-yl)-2'-(2-nitrophenyl)-4H,4'H-[3,3'-biquinazoline]-4,4'-dione (3ab)**

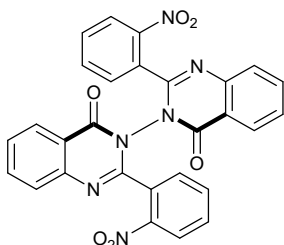

Flash column chromatography on silica gel gave the product (16.2 mg, 30% yield) as a white solid: M.p. 243-245 °C;  $[\alpha]_D^{25} = +125.5$  ( $c = 0.15$  in  $\text{CHCl}_3$ , 99:1 e.r.); The enantiomeric ratio was

determined by Daicel Chiralcel AD-H (0.46 cm × 25 cm), Hexanes/IPA = 60/40, 1.0 mL/min,  $\lambda$  = 254 nm, t (major) = 53.6 min, t (minor) = 33.2 min ;  $^1\text{H}$  NMR ( $\text{CDCl}_3$ , 500 MHz)  $\delta$  8.40 (d,  $J$  = 8.0 Hz, 2H), 8.03 (d,  $J$  = 3.0 Hz, 2H), 7.87- 7.81 (m, 4H), 7.63-7.59 (m, 8H),  $^{13}\text{C}$  NMR (125 MHz,  $\text{CDCl}_3$ )  $\delta$  161.0, 150.7, 147.9, 146.2, 136.0, 133.5, 131.6, 128.8, 128.3, 128.3, 127.7, 127.6, 125.3, 120.8, HRMS (ESI) m/z calcd for  $\text{C}_{28}\text{H}_{18}\text{N}_6\text{O}_6^+$  (M+H) $^+$  535.1361, found 535.1351.

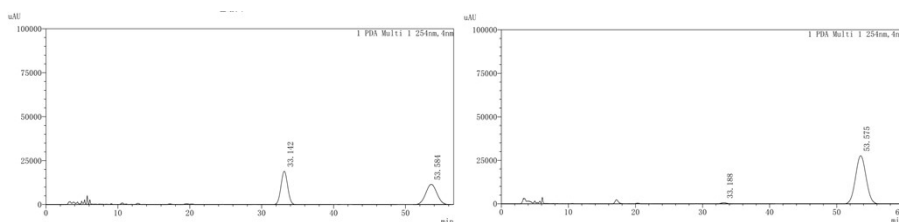

| PDA Ch1 254nm |           |         |        |         | PDA Ch1 254nm |           |         |        |         |
|---------------|-----------|---------|--------|---------|---------------|-----------|---------|--------|---------|
| Peak#         | Ret. Time | Area    | Height | Area%   | Peak#         | Ret. Time | Area    | Height | Area%   |
| 1             | 33.142    | 1223982 | 18953  | 49.793  | 1             | 33.188    | 41019   | 664    | 1.352   |
| 2             | 53.584    | 1234168 | 11476  | 50.207  | 2             | 53.575    | 2993412 | 27542  | 98.648  |
| 总计            |           | 2458150 | 30429  | 100.000 | 总计            |           | 3034430 | 28206  | 100.000 |

### (S)-2,2'-bis(2-bromophenyl)-4H,4'H-[3,3'-biquinazoline]-4,4'-dione (3ac)

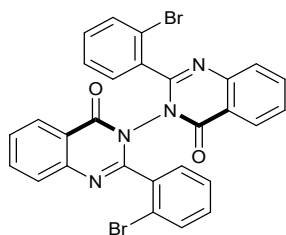

Flash column chromatography on silica gel gave the product (47.8 mg, 80% yield) as a white solid: M.p. 280-281 °C;  $[\alpha]_{\text{D}}^{25} = +344.3$  (c = 0.12 in  $\text{CHCl}_3$ , 91:9 e.r.); The enantiomeric ratio was determined by Daicel Chiralcel AD-H (0.46 cm × 25 cm), Hexanes/IPA = 80/20, 1.0 mL/min,  $\lambda$  = 254 nm, t (major) = 20.1 min, t (minor) = 23.8 min;  $^1\text{H}$  NMR ( $\text{CDCl}_3$ , 500 MHz)  $\delta$  8.41 (s, 2H), 7.86 (s, 2H), 7.79 (s, 2H), 7.66-7.56 (m, 6H), 7.18 (d,  $J$  = 20 Hz, 4H),  $^{13}\text{C}$  NMR (125 MHz,  $\text{CDCl}_3$ )  $\delta$  160.7, 151.9, 146.0, 135.8, 134.9, 132.5, 131.6, 128.5, 128.3, 128.2, 127.7, 127.1, 124.3, 121.0, HRMS (ESI) m/z calcd for  $\text{C}_{28}\text{H}_{17}\text{Br}_2\text{N}_4\text{O}_2^+$  (M+H) $^+$  598.9713, found 598.9709.

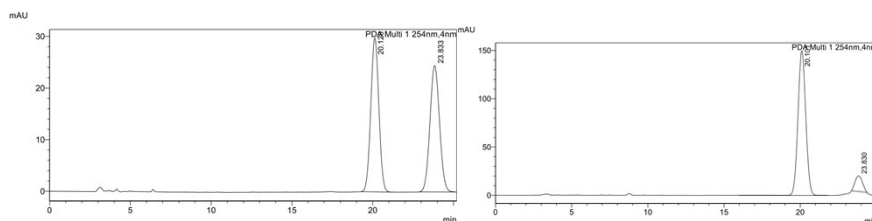

| PDA Ch1 254nm |           |         |        | PDA Ch1 254nm |       |           |         |        |         |
|---------------|-----------|---------|--------|---------------|-------|-----------|---------|--------|---------|
| Peak#         | Ret. Time | Area    | Height | Area%         | Peak# | Ret. Time | Area    | Height | Area%   |
| 1             | 20.128    | 1037574 | 29781  | 50.686        | 1     | 20.101    | 5320236 | 149591 | 90.704  |
| 2             | 23.833    | 1009489 | 24481  | 49.314        | 2     | 23.830    | 545280  | 16237  | 9.296   |
| 总计            |           | 2047064 | 54262  | 100.000       | 总计    |           | 5865516 | 165829 | 100.000 |

### (S)-2,2'-bis(2-fluorophenyl)-4*H*,4'*H*-[3,3'-biquinazoline]-4,4'-dione (3ad)

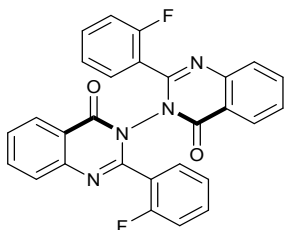

Flash column chromatography on silica gel gave the product (19.1 mg, 40% yield) as a white solid: M.p. 230-233 °C;  $[\alpha]_D^{25} = +94.3$  ( $c = 0.11$  in  $\text{CHCl}_3$ , 99:1 e.r.); The enantiomeric ratio was determined by Daicel Chiralcel AD-H (0.46 cm  $\times$  25 cm), Hexanes/IPA = 80/20, 1.0 mL/min,  $\lambda = 254$  nm,  $t$  (major) = 45.0 min,  $t$  (minor) = 26.6 min;  $^1\text{H}$  NMR ( $\text{CDCl}_3$ , 500 MHz)  $\delta$  8.40 (d,  $J = 8.0$  Hz, 2H), 7.83 (t,  $J = 7.5$  Hz, 2H), 7.74 (d,  $J = 8.0$  Hz, 2H), 7.59 (t,  $J = 8.0$  Hz, 2H), 7.40-7.34 (m, 4H), 7.09 (t,  $J = 9.5$  Hz, 2H), 6.99 (t,  $J = 7.5$  Hz, 2H);  $^{13}\text{C}$  NMR (125 MHz,  $\text{CDCl}_3$ )  $\delta$  159.8 (d,  $J = 252.5$  Hz), 159.7, 149.2, 146.2, 135.6, 132.8 (d,  $J = 7.5$  Hz), 129.1, 128.3, 128.2, 127.6, 124.0 (d,  $J = 2.5$  Hz), 121.0, 120.1 (d,  $J = 13.7$  Hz), 116.7 (d,  $J = 22.5$  Hz),  $^{19}\text{F}$  NMR (471 MHz  $\text{CDCl}_3$ )  $\delta$  -112.1; HRMS (ESI)  $m/z$  calcd for  $\text{C}_{28}\text{H}_{17}\text{F}_2\text{N}_4\text{O}_2^+$  ( $\text{M}+\text{H}$ ) $^+$  479.1314, found 479.1323.

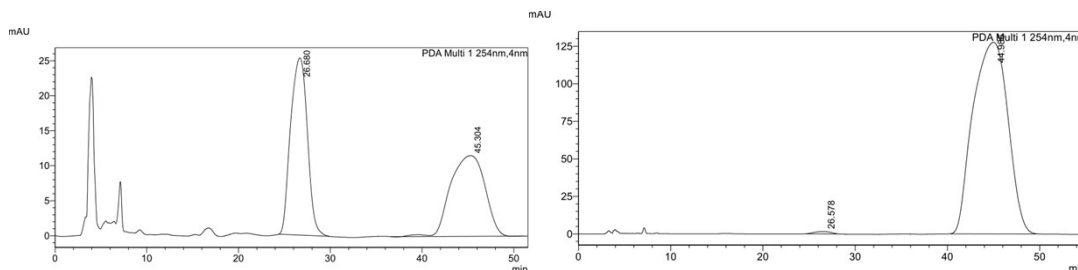

| PDA Ch1 254nm |           |         |        | PDA Ch1 254nm |       |           |          |        |         |
|---------------|-----------|---------|--------|---------------|-------|-----------|----------|--------|---------|
| Peak#         | Ret. Time | Area    | Height | Area%         | Peak# | Ret. Time | Area     | Height | Area%   |
| 1             | 26.680    | 3219169 | 25325  | 51.711        | 1     | 26.578    | 192395   | 1551   | 0.567   |
| 2             | 45.304    | 3006174 | 11527  | 48.289        | 2     | 44.986    | 33712024 | 127610 | 99.433  |
| 总计            |           | 6225343 | 36852  | 100.000       | 总计    |           | 33904419 | 129161 | 100.000 |

**(S)-2,2'-di-o-tolyl-4*H*,4'*H*-[3,3'-biquinazoline]-4,4'-dione (3ae)**

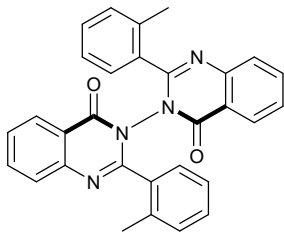

Flash column chromatography on silica gel gave the product (24.0 mg, 51% yield) as a white solid: M.p. 262-263 °C;  $[\alpha]_D^{25} = +249$  ( $c = 0.18$  in  $\text{CHCl}_3$ , 90:10 e.r.); The enantiomeric ratio was determined by Daicel Chiralcel AD-H (0.46 cm  $\times$  25 cm), Hexanes/IPA = 80/20, 1.0 mL/min,  $\lambda = 254$  nm,  $t$  (major) = 17.8 min,  $t$  (minor) = 9.5min;  $^1\text{H NMR}$  ( $\text{CDCl}_3$ , 500 MHz)  $\delta$  8.44 (d,  $J = 8.0$  Hz, 2H), 7.84 (t,  $J = 8.0$  Hz, 2H), 7.70 (d,  $J = 8.5$  Hz, 2H), 7.59 (t,  $J = 8.0$  Hz, 2H), 7.35 (s, 2H), 7.23-7.19 (m, 4H), 6.99 (t,  $J = 7.5$  Hz, 2H), 1.58(s, 6H);  $^{13}\text{C NMR}$  (125 MHz,  $\text{CDCl}_3$ )  $\delta$  160.5, 146.2, 138.4, 135.5, 131.6, 131.1, 130.3, 128.0, 128.0, 127.8, 127.7, 127.0, 125.6, 120.9, 19.4; HRMS (ESI)  $m/z$  calcd for  $\text{C}_{30}\text{H}_{22}\text{N}_4\text{O}_2^+$  ( $\text{M}+\text{H}$ ) $^+$  471.1816, found 471.1807.

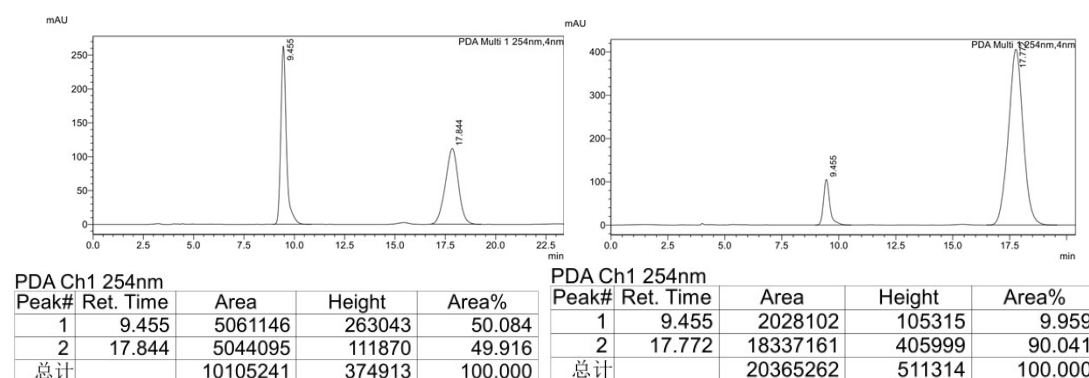

**(S)-2,2'-bis(2-chlorophenyl)-4*H*,4'*H*-[3,3'-biquinazoline]-4,4'-dione (3af)**

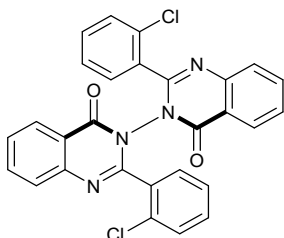

Flash column chromatography on silica gel gave the product (15.8 mg, 31% yield) as a white solid: M.p. 259-261 °C;  $[\alpha]_D^{25} = +145.4$  ( $c = 0.15$  in  $\text{CHCl}_3$ , 90:10 e.r.); The enantiomeric ratio was

determined by Daicel Chiralcel OD-H (0.46 cm × 25 cm), Hexanes/IPA = 80/20, 1.0 mL/min,  $\lambda = 254$  nm,  $t$  (major) = 30.7 min,  $t$  (minor) = 14.2min;  $^1\text{H}$  NMR ( $\text{CDCl}_3$ , 500 MHz)  $\delta$  8.41 (d,  $J = 8.0$  Hz, 2H), 7.86 (t,  $J = 8.0$  Hz, 2H), 7.77 (d,  $J = 8.0$  Hz, 2H), 7.61 (t,  $J = 7.5$  Hz, 2H), 7.54 (s, 2H), 7.45 (d,  $J = 8.5$  Hz, 2H), 7.29 (t,  $J = 8.0$  Hz, 2H), 7.11(t,  $J = 8.0$  Hz 2H);  $^{13}\text{C}$  NMR (125 MHz,  $\text{CDCl}_3$ )  $\delta$  160.6, 150.9, 146.1, 135.8, 134.4, 131.5, 131.3, 131.3, 130.6, 128.3, 128.2, 127.7, 126.5, 121.0; HRMS (ESI)  $m/z$  calcd for  $\text{C}_{28}\text{H}_{16}\text{Cl}_2\text{N}_4\text{O}_2^+$  (M+H) $^+$  511.0723, found 511.0714.

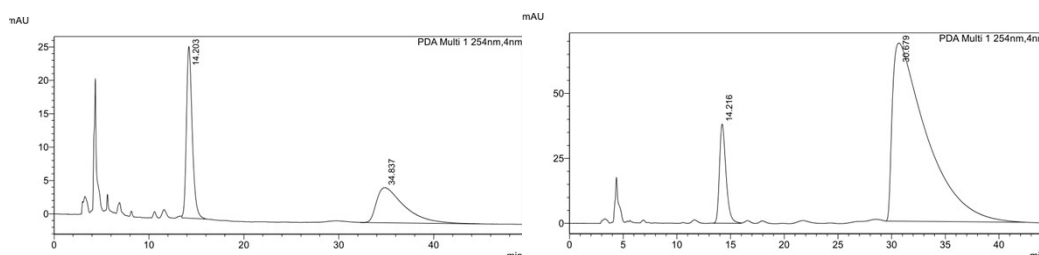

| PDA Ch1 254nm |           |         |        |
|---------------|-----------|---------|--------|
| Peak#         | Ret. Time | Area    | Height |
| 1             | 14.203    | 1094307 | 25711  |
| 2             | 34.837    | 1072100 | 5269   |
| 总计            |           | 2166406 | 30981  |

| PDA Ch1 254nm |           |          |        |
|---------------|-----------|----------|--------|
| Peak#         | Ret. Time | Area     | Height |
| 1             | 14.216    | 1612448  | 38124  |
| 2             | 30.679    | 15165811 | 68510  |
| 总计            |           | 16778259 | 106633 |

### (S)-2,2'-bis(2-iodophenyl)-4*H*,4'*H*-[3,3'-biquinazoline]-4,4'-dione (3ag)

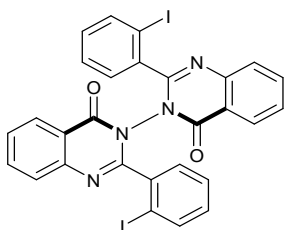

Flash column chromatography on silica gel gave the product (34.7 mg, 50% yield) as a white solid: M.p. 270-272 °C;  $[\alpha]_{\text{D}}^{25} = +174.1$  ( $c = 0.14$  in  $\text{CHCl}_3$ , 90:10 e.r.); The enantiomeric ratio was determined by Daicel Chiralcel AD-H (0.46 cm × 25 cm), Hexanes/IPA = 80/20, 1.0 mL/min,  $\lambda = 254$  nm,  $t$  (major) = 12.9 min,  $t$  (minor) = 20.9min;  $^1\text{H}$  NMR ( $\text{CDCl}_3$ , 500 MHz)  $\delta$  8.43 (d,  $J = 6.5$  Hz, 2H), 7.99 (d,  $J = 7.5$  Hz, 2H), 7.88 (t,  $J = 7.5$  Hz, 2H), 7.81 (t,  $J = 7.5$  Hz, 2H), 7.62 (t,  $J = 7.5$ Hz, 2H), 7.56 (s, 2H), 7.20 (t,  $J = 7.5$  Hz, 2H), 7.03 (t,  $J = 7.5$  Hz, 2H);  $^{13}\text{C}$  NMR (125 MHz,  $\text{CDCl}_3$ )  $\delta$  160.8, 153.5, 146.0, 142.0, 135.9, 135.9, 131.7, 128.3, 128.2, 128.0, 128.0, 127.7, 121.0, 99.5; HRMS (ESI)  $m/z$  calcd for  $\text{C}_{28}\text{H}_{16}\text{I}_2\text{N}_4\text{O}_2^+$  (M+H) $^+$  694.9435, found 694.9432.

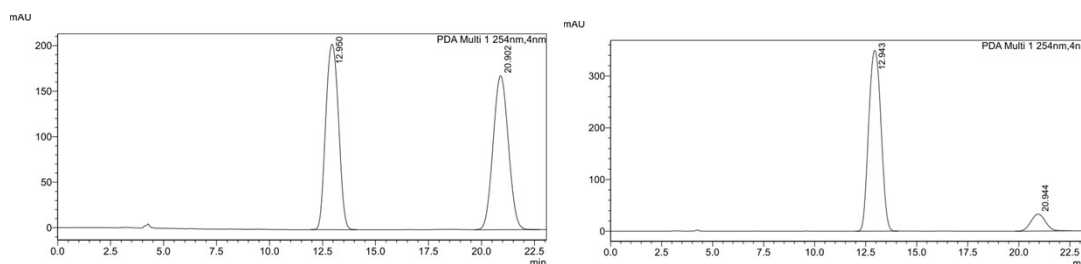

| PDA Ch1 254nm |           |          |        |         | PDA Ch1 254nm |           |          |        |         |
|---------------|-----------|----------|--------|---------|---------------|-----------|----------|--------|---------|
| Peak#         | Ret. Time | Area     | Height | Area%   | Peak#         | Ret. Time | Area     | Height | Area%   |
| 1             | 12.950    | 8544109  | 203607 | 50.193  | 1             | 12.943    | 14662066 | 349297 | 89.874  |
| 2             | 20.902    | 8478533  | 169033 | 49.807  | 2             | 20.944    | 1651944  | 32922  | 10.126  |
| 总计            |           | 17022642 | 372640 | 100.000 | 总计            |           | 16314011 | 382219 | 100.000 |

### (S)-2,2'-bis(3-chlorophenyl)-4*H*,4'*H*-[3,3'-biquinazoline]-4,4'-dione (3ah)

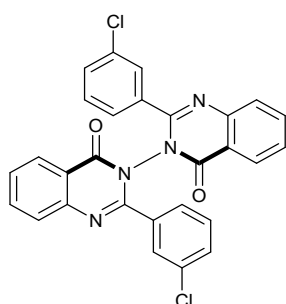

Flash column chromatography on silica gel gave the product (28.1 mg, 55% yield) as a white solid: M.p. 217-220 °C;  $[\alpha]_D^{25} = +140.1$  ( $c = 0.13$  in  $\text{CHCl}_3$ , 87:13 e.r.); The enantiomeric ratio was determined by Daicel Chiralcel AD-H (0.46 cm  $\times$  25 cm), Hexanes/IPA = 80/20, 1.0 mL/min,  $\lambda = 254$  nm,  $t$  (major) = 27.8 min,  $t$  (minor) = 16.9 min;  $^1\text{H}$  NMR ( $\text{CDCl}_3$ , 500 MHz)  $\delta$  8.48 (d,  $J = 8.5$  Hz, 2H), 7.93 (t,  $J = 8.0$  Hz, 2H), 7.80 (t,  $J = 8.0$  Hz, 2H), 7.68 (t,  $J = 8.5$  Hz, 2H), 7.46 (s, 2H), 7.33 (s, 2H), 7.25 (s, 4H);  $^{13}\text{C}$  NMR (125 MHz,  $\text{CDCl}_3$ )  $\delta$  159.7, 152.4, 146.3, 135.8, 134.6, 133.6, 131.1, 129.6, 128.8, 128.3, 128.3, 127.7, 125.7, 120.8; HRMS (ESI)  $m/z$  calcd for  $\text{C}_{28}\text{H}_{17}\text{Cl}_2\text{N}_4\text{O}_2^+$  ( $\text{M}+\text{H}$ ) $^+$  511.0723, found 511.0717.

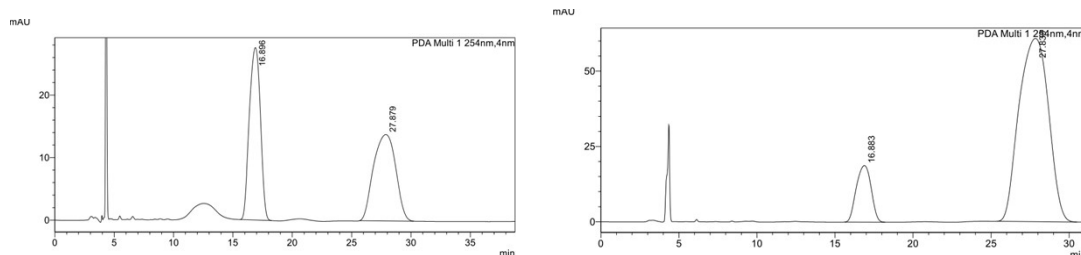

| PDA Ch1 254nm |           |         |        |         | PDA Ch1 254nm |           |         |        |         |
|---------------|-----------|---------|--------|---------|---------------|-----------|---------|--------|---------|
| Peak#         | Ret. Time | Area    | Height | Area%   | Peak#         | Ret. Time | Area    | Height | Area%   |
| 1             | 16.896    | 1790954 | 27589  | 49.945  | 1             | 16.883    | 1240309 | 18777  | 13.404  |
| 2             | 27.879    | 1794903 | 13816  | 50.055  | 2             | 27.839    | 8012917 | 60797  | 86.596  |
| 总计            |           | 3585857 | 41405  | 100.000 | 总计            |           | 9253226 | 79574  | 100.000 |

**(S)-2,2'-bis(4-iodophenyl)-4*H*,4'*H*-[3,3'-biquinazoline]-4,4'-dione (3ai)**

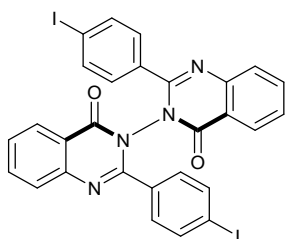

Flash column chromatography on silica gel gave the product (43.7 mg, 63% yield) as a white solid: M.p. 277-279 °C;  $[\alpha]_D^{25} = +235.9$  ( $c = 0.16$  in  $\text{CHCl}_3$ , 85:15 e.r.); The enantiomeric ratio was determined by Daicel Chiralcel AD-H (0.46 cm  $\times$  25 cm), Hexanes/IPA = 80/20, 1.0 mL/min,  $\lambda = 254$  nm,  $t$  (major) = 83.3 min,  $t$  (minor) = 30.0 min;  $^1\text{H NMR}$  ( $\text{CDCl}_3$ , 500 MHz)  $\delta$  8.38 (d,  $J = 8.0$  Hz, 2H), 7.86 (t,  $J = 7.5$  Hz, 2H), 7.73 (d,  $J = 8.5$  Hz, 2H), 7.61 (d,  $J = 8.0$  Hz, 6H), 6.98 (d,  $J = 8.0$  Hz, 4H);  $^{13}\text{C NMR}$  (125 MHz,  $\text{CDCl}_3$ )  $\delta$  159.7, 152.9, 146.4, 137.6, 137.6, 135.8, 131.7, 129.6, 129.6, 128.4, 128.2, 127.7, 120.7, 97.8; HRMS (ESI)  $m/z$  calcd for  $\text{C}_{28}\text{H}_{17}\text{I}_2\text{N}_4\text{O}_2^+$  ( $\text{M}+\text{H}$ ) $^+$  694.9435, found 694.9434.

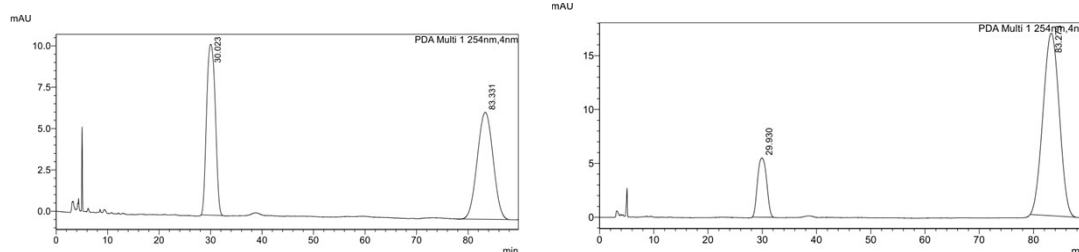

| PDA Ch1 254nm |           |         |        | PDA Ch1 254nm |       |           |         |        |         |
|---------------|-----------|---------|--------|---------------|-------|-----------|---------|--------|---------|
| Peak#         | Ret. Time | Area    | Height | Area%         | Peak# | Ret. Time | Area    | Height | Area%   |
| 1             | 30.023    | 1210802 | 10342  | 46.740        | 1     | 29.930    | 635760  | 5493   | 15.248  |
| 2             | 83.331    | 1379717 | 6470   | 53.260        | 2     | 83.273    | 3533734 | 16939  | 84.752  |
| 总计            |           | 2590520 | 16812  | 100.000       | 总计    |           | 4169494 | 22432  | 100.000 |

**(S)-2,2'-bis(4-bromophenyl)-4*H*,4'*H*-[3,3'-biquinazoline]-4,4'-dione (3aj)**

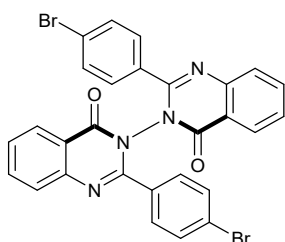

Flash column chromatography on silica gel gave the product (54.4 mg, 91% yield) as a white solid: M.p. 255-258 °C;  $[\alpha]_D^{25} = + 88.5$  ( $c = 0.14$  in  $\text{CHCl}_3$ , 89:11 e.r.); The enantiomeric ratio was determined by Daicel Chiralcel AD-H (0.46 cm  $\times$  25 cm), Hexanes/IPA = 80/20, 1.0 mL/min,  $\lambda = 254$  nm,  $t$  (major) = 72.0 min,  $t$  (minor) = 25.6 min;  $^1\text{H}$  NMR ( $\text{CDCl}_3$ , 500 MHz)  $\delta$  8.38 (d,  $J = 7.5$  Hz, 2H), 7.85 (t,  $J = 7.5$  Hz, 2H), 7.73 (d,  $J = 8.0$  Hz, 2H), 7.60 (t,  $J = 7.5$  Hz, 2H), 7.40 (d,  $J = 7.5$ , 4H), 7.13 (d,  $J = 7.5$  Hz, 4H);  $^{13}\text{C}$  NMR (125 MHz,  $\text{CDCl}_3$ )  $\delta$  159.7, 152.8, 146.4, 135.8, 131.7, 131.7, 131.1, 129.7, 129.7, 128.3, 128.2, 127.7, 125.6, 120.7; HRMS (ESI)  $m/z$  calcd for  $\text{C}_{28}\text{H}_{17}\text{Br}_2\text{N}_4\text{O}_2^+$  ( $\text{M}+\text{H}$ ) $^+$  598.9713, found 598.9706.

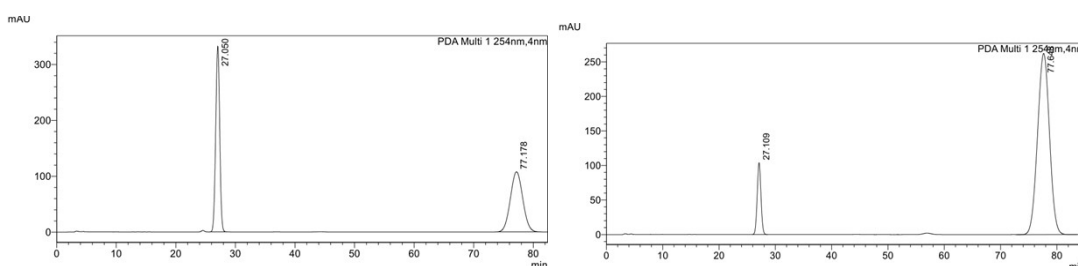

| PDA Ch1 254nm |           |          |        |         | PDA Ch1 254nm |           |          |        |         |
|---------------|-----------|----------|--------|---------|---------------|-----------|----------|--------|---------|
| Peak#         | Ret. Time | Area     | Height | Area%   | Peak#         | Ret. Time | Area     | Height | Area%   |
| 1             | 27.050    | 15571028 | 332616 | 50.027  | 1             | 27.109    | 4867565  | 103922 | 11.175  |
| 2             | 77.178    | 15554513 | 107591 | 49.973  | 2             | 77.648    | 38688408 | 262148 | 88.825  |
| 总计            |           | 31125541 | 440207 | 100.000 | 总计            |           | 43555972 | 366069 | 100.000 |

### (S)-2,2'-bis(4-chlorophenyl)-4H,4'H-[3,3'-biquinazoline]-4,4'-dione (3ak)

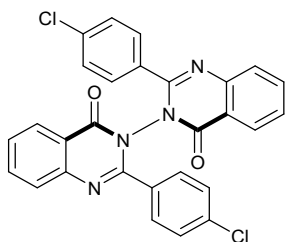

Flash column chromatography on silica gel gave the product (47.9 mg, 94% yield) as a white solid: M.p. 225-226 °C;  $[\alpha]_D^{25} = + 71.9$  ( $c = 0.16$  in  $\text{CHCl}_3$ , 80:20 e.r.); The enantiomeric ratio was determined by Daicel Chiralcel AD-H (0.46 cm  $\times$  25 cm), Hexanes/IPA = 80/20, 1.0 mL/min,  $\lambda = 254$  nm,  $t$  (major) = 62.9 min,  $t$  (minor) = 21.7 min;  $^1\text{H}$  NMR ( $\text{CDCl}_3$ , 500 MHz)  $\delta$  8.41 (d,  $J = 8.0$  Hz, 2H), 7.88 (t,  $J = 8.0$  Hz, 2H), 7.76 (d,  $J = 8.5$  Hz, 2H), 7.63 (t,  $J = 7.5$  Hz, 2H), 7.28 (d,  $J = 4.5$  Hz, 4H), 7.22 (d,  $J = 8.0$  Hz, 4H);  $^{13}\text{C}$  NMR (125 MHz,  $\text{CDCl}_3$ )  $\delta$  159.7, 152.7, 146.4, 137.2, 135.8, 130.6, 130.6, 129.5, 129.5, 128.7, 128.3, 128.2, 127.7, 120.7; HRMS (ESI)  $m/z$  calcd for



$C_{28}H_{17}Cl_2N_4O_2^+ (M+H)^+$  511.0723, found 511.0728.

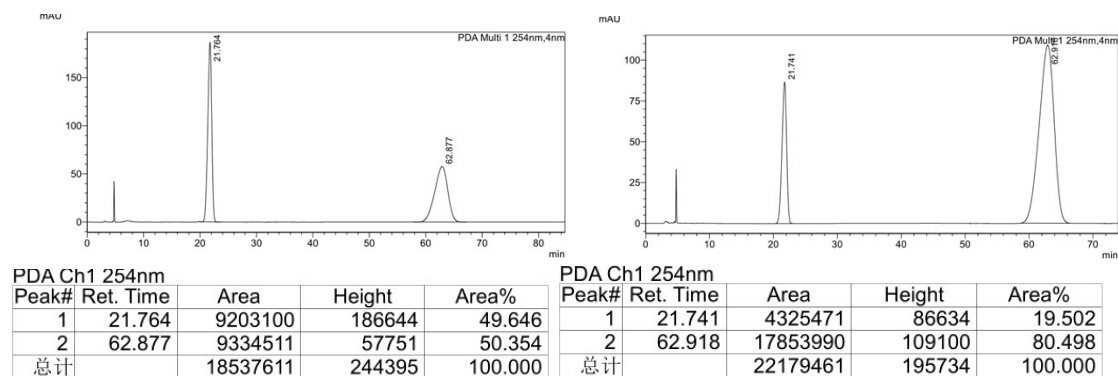

### (S)-2,2'-di-p-tolyl-4*H*,4'*H*-[3,3'-biquinazoline]-4,4'-dione (3a)

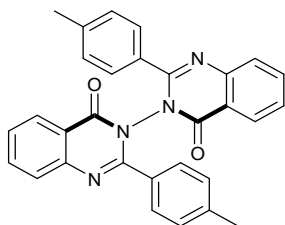

Flash column chromatography on silica gel gave the product (21.2 mg, 45% yield) as a white solid: M.p. 219-220 °C;  $[\alpha]_D^{25} = +135.9$  ( $c = 0.20$  in  $CHCl_3$ , 87:13 e.r.); The enantiomeric ratio was determined by Daicel Chiralcel AD-H (0.46 cm  $\times$  25 cm), Hexanes/IPA = 80/20, 1.0 mL/min,  $\lambda = 254$  nm,  $t$  (major) = 68.5 min,  $t$  (minor) = 19.2 min;  $^1H$  NMR ( $CDCl_3$ , 500 MHz)  $\delta$  8.39 (d,  $J = 7.5$  Hz, 2H), 7.81 (t,  $J = 7.5$  Hz, 2H), 7.71 (d,  $J = 8.5$  Hz, 2H), 7.56 (t,  $J = 8.0$  Hz, 2H), 7.13 (d,  $J = 8.0$  Hz, 4H), 7.03 (d,  $J = 8.0$  Hz, 4H);  $^{13}C$  NMR (125 MHz,  $CDCl_3$ )  $\delta$  159.9, 154.2, 146.7, 141.0, 135.4, 129.4, 128.9, 128.9, 128.1, 128.1, 128.1, 127.7, 127.6, 120.8, 21.4; HRMS (ESI)  $m/z$  calcd for  $C_{30}H_{23}N_4O_2^+ (M+H)^+$  471.1816, found 471.1824.

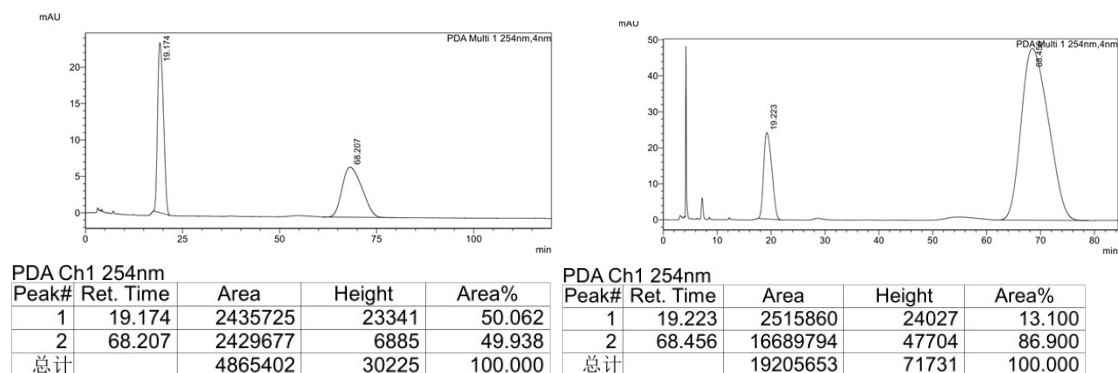

**(S)-2,2'-di(naphthalen-2-yl)-4H,4'H-[3,3'-biquinazoline]-4,4'-dione (3am)**

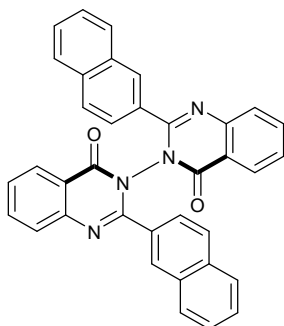

Flash column chromatography on silica gel gave the product (27.1 mg, 50% yield) as a white solid: M.p. 260-263 °C;  $[\alpha]_D^{25} = +58.8$  ( $c = 0.15$  in  $\text{CHCl}_3$ , 99:1 e.r.); The enantiomeric ratio was determined by Daicel Chiralcel AD-H (0.46 cm  $\times$  25 cm), Hexanes/IPA = 80/20, 1.0 mL/min,  $\lambda = 254$  nm,  $t$  (major) = 50.3 min,  $t$  (minor) = 30.7 min;  $^1\text{H}$  NMR ( $\text{CDCl}_3$ , 500 MHz)  $\delta$  8.48 (d,  $J = 8.0$  Hz, 2H), 7.81 (t,  $J = 8.5$  Hz, 4H), 7.67 (t,  $J = 7.5$  Hz, 4H), 7.62-7.48 (m, 10H), 7.29 (d,  $J = 8.0$  Hz, 2H);  $^{13}\text{C}$  NMR (125 MHz,  $\text{CDCl}_3$ )  $\delta$  160.0, 153.9, 146.6, 135.5, 133.9, 132.3, 129.5, 129.2, 128.6, 128.2, 128.2, 128.0, 127.9, 127.7, 127.7, 126.9, 124.0, 120.9; HRMS (ESI)  $m/z$  calcd for  $\text{C}_{36}\text{H}_{23}\text{N}_4\text{O}_2^+$  ( $\text{M}+\text{H}$ ) $^+$  543.1816, found 543.1819.

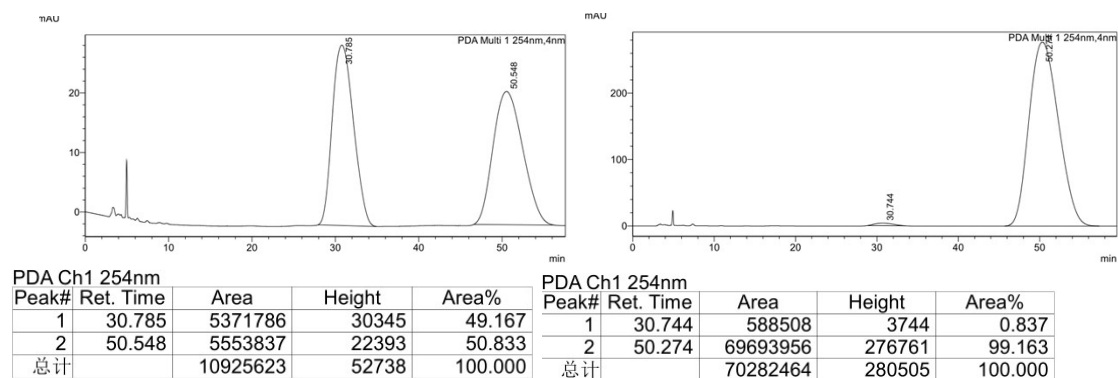

**(S)-2,2'-di(thiophen-2-yl)-4H,4'H-[3,3'-biquinazoline]-4,4'-dione (3an)**

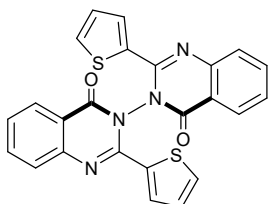

Flash column chromatography on silica gel gave the product (18.2 mg, 40% yield) as a white solid: M.p. 270-272 °C;  $[\alpha]_D^{25} = + 118.3$  ( $c = 0.18$  in  $\text{CHCl}_3$ , 75:25 e.r.); The enantiomeric ratio was determined by Daicel Chiralcel OD-H (0.46 cm  $\times$  25 cm), Hexanes/IPA = 90/10, 1.0 mL/min,  $\lambda = 254$  nm,  $t$  (major) = 34.2 min,  $t$  (minor) = 40.4 min;  $^1\text{H}$  NMR ( $\text{CDCl}_3$ , 500 MHz)  $\delta$  8.24 (d,  $J = 8.0$  Hz, 2H), 7.86 (s, 4H), 7.50 (d,  $J = 17.5$  Hz, 4H), 7.42 (s, 2H), 6.94 (t,  $J = 4.5$ , 2H);  $^{13}\text{C}$  NMR (125 MHz,  $\text{CDCl}_3$ )  $\delta$  159.4, 148.4, 147.1, 135.7, 134.1, 131.6, 131.1, 128.2, 128.1, 127.8, 127.4, 120.6; HRMS (ESI)  $m/z$  calcd for  $\text{C}_{24}\text{H}_{15}\text{N}_4\text{O}_2\text{S}_2^+$  ( $\text{M}+\text{H}$ ) $^+$  455.0631, found 455.0638.

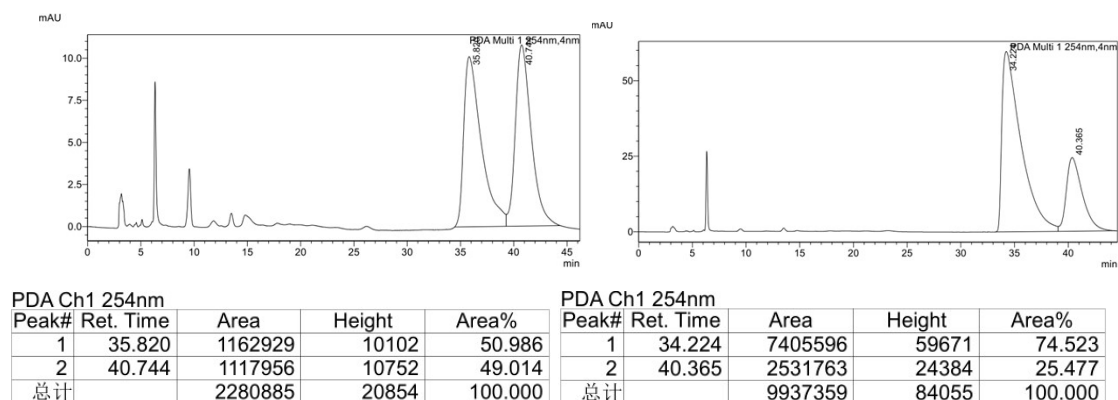

### (S)-2,2'-di(thiophen-3-yl)-4*H*,4'*H*-[3,3'-biquinazoline]-4,4'-dione (3ao)

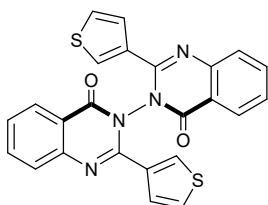

Flash column chromatography on silica gel gave the product (13.6 mg, 30% yield) as a white solid: M.p. 247-249 °C;  $[\alpha]_D^{25} = + 84.2$  ( $c = 0.16$  in  $\text{CHCl}_3$ , 69:31 e.r.); The enantiomeric ratio was determined by Daicel Chiralcel OD-H (0.46 cm  $\times$  25 cm), Hexanes/IPA = 80/20, 1.0 mL/min,  $\lambda = 254$  nm,  $t$  (major) = 38.4 min,  $t$  (minor) = 16.4 min;  $^1\text{H}$  NMR ( $\text{CDCl}_3$ , 500 MHz)  $\delta$  8.30 (d,  $J = 7.5$  Hz, 2H), 7.85 (t,  $J = 7.5$  Hz, 2H), 7.79 (d,  $J = 9.0$  Hz, 2H), 7.55 (t,  $J = 6.5$  Hz, 2H), 7.50 (s, 2H), 7.23 (s, 4H);  $^{13}\text{C}$  NMR (125 MHz,  $\text{CDCl}_3$ )  $\delta$  159.5, 149.8, 146.9, 135.6, 132.8, 128.5, 128.2, 127.7, 127.7, 127.6, 126.5, 120.7; HRMS (ESI)  $m/z$  calcd for  $\text{C}_{24}\text{H}_{15}\text{N}_4\text{O}_2\text{S}_2^+$  ( $\text{M}+\text{H}$ ) $^+$  455.0631, found 455.0632.

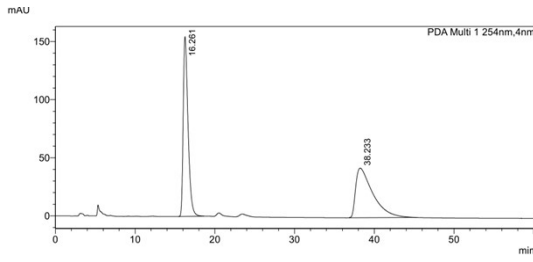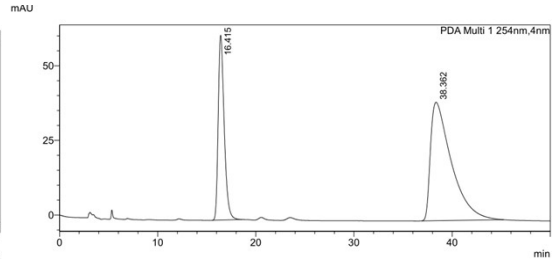

PDA Ch1 254nm

| Peak# | Ret. Time | Area     | Height | Area%   |
|-------|-----------|----------|--------|---------|
| 1     | 16.261    | 6526259  | 154708 | 50.560  |
| 2     | 38.233    | 6381667  | 42713  | 49.440  |
| 总计    |           | 12907927 | 197421 | 100.000 |

PDA Ch1 254nm

| Peak# | Ret. Time | Area    | Height | Area%   |
|-------|-----------|---------|--------|---------|
| 1     | 16.415    | 2627731 | 61877  | 30.849  |
| 2     | 38.362    | 5890371 | 39650  | 69.151  |
| 总计    |           | 8518102 | 101527 | 100.000 |

### 3. Synthetic applications

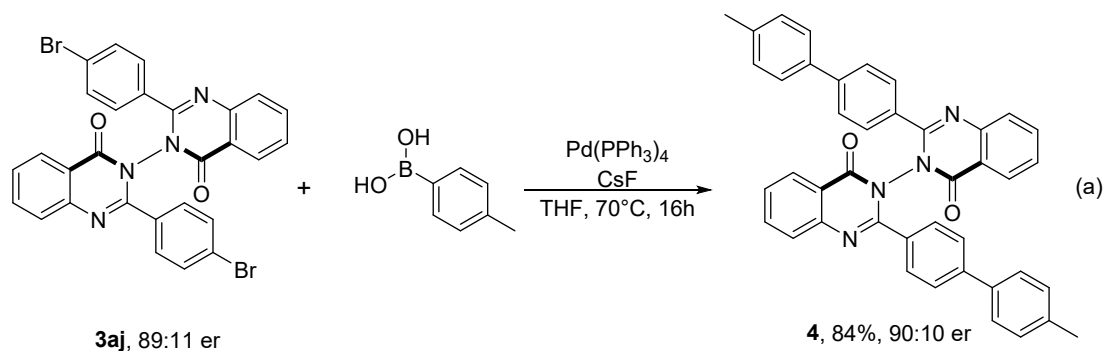

A dried 25 mL Schlenk tube was charged with **3aj** (0.20 mmol, 119.8 mg), *p*-tolylboronic acid (0.5 mmol, 68 mg) and  $\text{Pd}(\text{PPh}_3)_4$  (0.02 mmol, 23.1 mg), CsF (0.8 mmol, 121.5 mg), 4 mL of THF added by syringe. The reaction tube was vacuumed and refilled with Ar for 3 times, and was placed in 70 °C oil-bath for 16 h. The crude reaction mixture was concentrated in vacuo and the residue was purified by silica gel flash column chromatography to afford the corresponding products **4**.

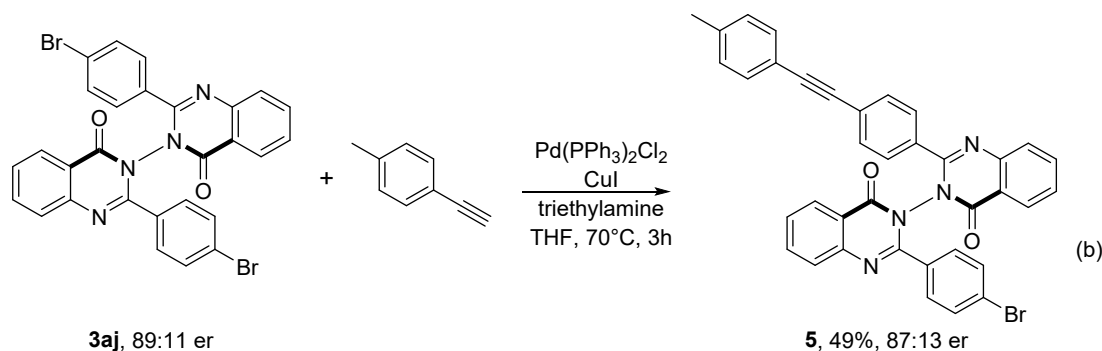

A dried 25 mL Schlenk tube was charged with **3aj** (0.20 mmol, 119.8mg), 4-methyl phenylacetylene (0.3 mmol, 38  $\mu\text{L}$ ), CuI (0.02mmol, 3.8 mg) and  $\text{Pd}(\text{PPh}_3)_2\text{Cl}_2$  (0.02 mmol, 14 mg), triethylamine(0.8 mmol, 111  $\mu\text{L}$ ), 4 mL of THF added by syringe. The reaction tube was vacuumed and refilled with Ar for 3 times, and was placed in 70 °C oil-bath for 3 h. The crude reaction mixture was concentrated in vacuo and the residue was purified by silica gel flash column chromatography to afford the corresponding products **5**.

**(S)-2,2'-bis(4'-methyl-[1,1'-biphenyl]-4-yl)-4H,4'H-[3,3'-biquinazoline]-4,4'-dione**  
**(4)**

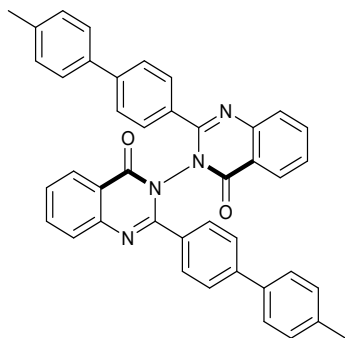

Flash column chromatography on silica gel gave the product (104.5 mg, 84% yield) as a white solid: M.p. 250-251 °C;  $[\alpha]_D^{25} = +91.8$  (c = 0.13 in  $\text{CHCl}_3$ , 90:10 e.r.); The enantiomeric ratio was determined by Daicel Chiralcel AD-H (0.46 cm  $\times$  25 cm), Hexanes/IPA = 70/30, 1.0 mL/min,  $\lambda = 254$  nm, t (major) = 91.7 min, t (minor) = 21.9 min;  $^1\text{H}$  NMR ( $\text{CDCl}_3$ , 500 MHz)  $\delta$  8.42 (s, 2H), 7.83 (s, 2H), 7.74 (s, 2H), 7.58 (s, 2H), 7.45 (d,  $J = 16.5$  Hz, 8H), 7.34 (s, 4H), 7.23 (s, 4H), 2.38 (s, 6H);  $^{13}\text{C}$  NMR (125 MHz,  $\text{CDCl}_3$ )  $\delta$  159.9, 153.9, 146.7, 143.4, 138.1, 136.7, 135.5, 130.7, 129.6, 128.7, 128.2, 127.8, 127.7, 126.9, 126.6, 120.8, 21.1; HRMS (ESI) m/z calcd for  $\text{C}_{42}\text{H}_{31}\text{N}_4\text{O}_2^+$  (M+H) $^+$  623.2442, found 623.2452.

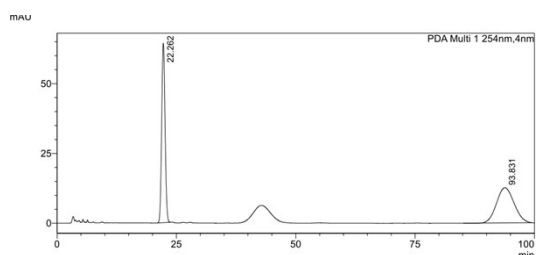

| PDA Ch1 254nm |           |         |        |         |
|---------------|-----------|---------|--------|---------|
| Peak#         | Ret. Time | Area    | Height | Area%   |
| 1             | 22.262    | 3165458 | 64271  | 49.605  |
| 2             | 93.831    | 3215903 | 12599  | 50.395  |
| 总计            |           | 6381361 | 76870  | 100.000 |

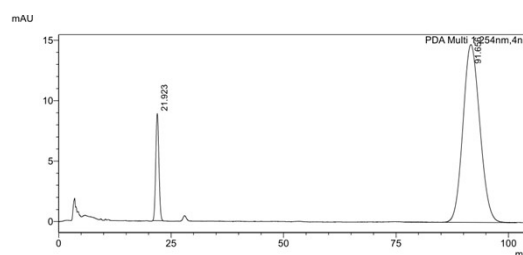

| PDA Ch1 254nm |           |         |        |         |
|---------------|-----------|---------|--------|---------|
| Peak#         | Ret. Time | Area    | Height | Area%   |
| 1             | 21.923    | 433018  | 8852   | 10.172  |
| 2             | 91.656    | 3823732 | 14700  | 89.828  |
| 总计            |           | 4256750 | 23552  | 100.000 |

**(S)-2-(4-bromophenyl)-2'-(4-(p-tolyethynyl)phenyl)-4H,4'H-[3,3'-biquinazoline]-4,4'-dione**  
**(5)**

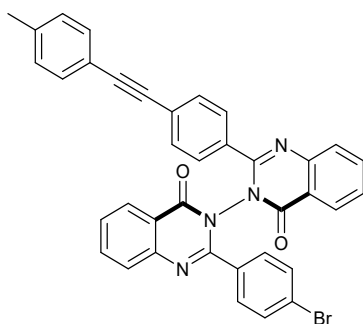

Flash column chromatography on silica gel gave the product (62.1 mg, 49% yield) as a white solid: M.p. 220-223 °C;  $[\alpha]_D^{25} = +87.8$  ( $c = 0.15$  in  $\text{CHCl}_3$ , 87:13 e.r.); The enantiomeric ratio was determined by Daicel Chiralcel AD-H (0.46 cm  $\times$  25 cm), Hexanes/IPA = 70/30, 1.0 mL/min,  $\lambda = 254$  nm,  $t$  (major) = 54.9 min,  $t$  (minor) = 28.7 min;  $^1\text{H NMR}$  ( $\text{CDCl}_3$ , 500 MHz)  $\delta$  8.39 (d,  $J = 7.5$  Hz, 2H), 7.84 (t,  $J = 7.5$  Hz, 2H), 7.76-7.70 (m, 2H), 7.60 (t,  $J = 7.5$  Hz, 2H), 7.39 (s, 6H), 7.22 (d,  $J = 7.5$  Hz, 2H), 7.13 (t,  $J = 10.5$  Hz, 4H), 2.36 (s, 3H);  $^{13}\text{C NMR}$  (125 MHz,  $\text{CDCl}_3$ )  $\delta$  159.7, 159.6, 153.1, 152.8, 146.5, 146.4, 139.1, 135.7, 135.7, 131.6, 131.5, 131.3, 131.3, 131.3, 131.1, 129.7, 129.2, 128.3, 128.1, 128.1, 127.7, 126.3, 125.6, 120.7, 120.6, 119.3, 92.4, 87.6, 21.5; HRMS (ESI)  $m/z$  calcd for  $\text{C}_{37}\text{H}_{24}\text{BrN}_4\text{O}_2^+$  ( $\text{M}+\text{H}$ ) $^+$  635.1077, found 635.1082.

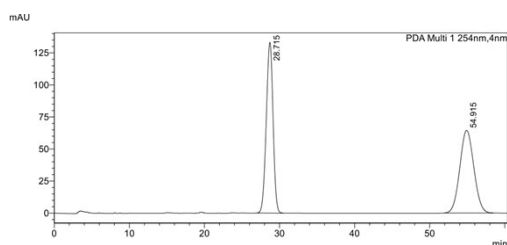

| PDA Ch1 254nm |           |          |        |         |
|---------------|-----------|----------|--------|---------|
| Peak#         | Ret. Time | Area     | Height | Area%   |
| 1             | 28.715    | 8329884  | 133071 | 49.943  |
| 2             | 54.915    | 8348803  | 64464  | 50.057  |
| 总计            |           | 16678688 | 197535 | 100.000 |

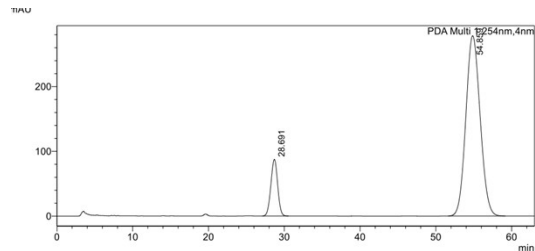

| PDA Ch1 254nm |           |          |        |         |
|---------------|-----------|----------|--------|---------|
| Peak#         | Ret. Time | Area     | Height | Area%   |
| 1             | 28.691    | 5451723  | 87470  | 13.000  |
| 2             | 54.859    | 36483786 | 278374 | 87.000  |
| 总计            |           | 41935509 | 365845 | 100.000 |

## 4. One-mmol-scale synthesis of compound 3aa

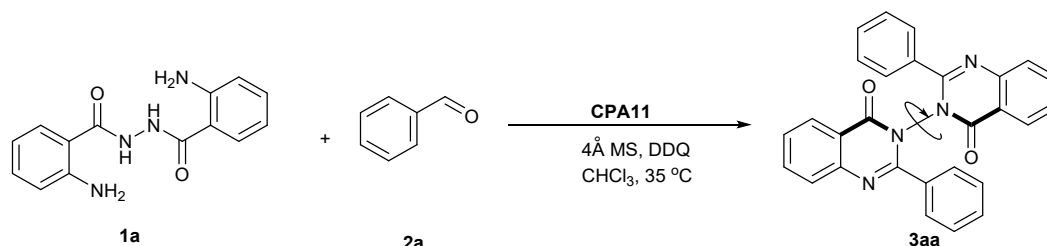

An oven-dried 100 mL Schlenk tube charged with **1a** (1 mmol), **CPA11** (0.1 mmol, 61 mg), and DDQ (2.8 mmol, 635 mg), 4Å MS (1000 mg), 10 mL of CHCl<sub>3</sub> added by syringe and benzaldehyde (2 mmol, 200 μL) added by pipette. After 24 h, **2a** (2 mmol) was added to the reaction mixture. After 36 h, **2a** (2 mmol) was added to the reaction mixture. After 48 h, **2a** (2 mmol) was added to the reaction mixture. Then, the tube was vacuumed and refilled with Ar for 3 times and was placed in 35 °C oil-bath for 60 h. The crude reaction mixture was concentrated in vacuo and the residue was purified by silica gel flash column chromatography to afford the corresponding products.

## 5. Synthesis of Substrates

To an efficiently stirred suspension of isatoic anhydride in 1,4-dioxane was added hydrazine monohydrate and the mixture heated at reflux for 16 h. The crude reaction mixture was concentrated in vacuo and the residue was purified by silica gel flash column chromatography to afford the corresponding products **1a-1f**.

### 2-amino-N'-(2-aminobenzoyl)benzohydrazide (**1a**)

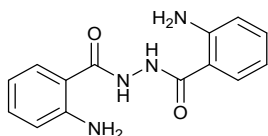

Flash column chromatography on silica gel gave the product (1.08 g, 80% yield) as a white solid: M.p. 210-212 °C; <sup>1</sup>H NMR (DMSO<sub>d-6</sub>, 500 MHz) δ 10.04 (s, 2H), 7.61 (t, *J* = 5.5 Hz, 2H), 7.19 (t, *J* = 8.0 Hz, 2H), 6.74 (d, *J* = 8.0 Hz, 2H), 6.55 (t, *J* = 7.5 Hz, 2H), 6.42 (s, 4H); <sup>13</sup>C NMR (125 MHz, DMSO<sub>d-6</sub>) δ 168.6, 145.0, 132.4, 128.3, 116.5, 114.8, 112.8; HRMS (ESI) *m/z* calcd for C<sub>14</sub>H<sub>15</sub>N<sub>4</sub>O<sub>2</sub><sup>+</sup> (M+H)<sup>+</sup> 271.1190, found 271.1182.



**2-amino-N'-(2-amino-5-fluorobenzoyl)-5-fluorobenzohydrazide (1b)**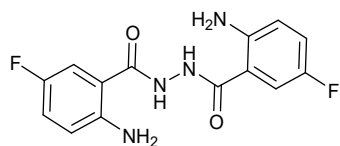

Flash column chromatography on silica gel gave the product (428 mg, 70% yield) as a white solid: M.p. 226-229 °C; <sup>1</sup>H NMR (DMSO<sub>d-6</sub>, 500 MHz) δ 10.18 (s, 2H), 7.44 (d, *J* = 9.5 Hz 2H), 7.12 (s, 2H), 6.77 (s, 2H), 6.32 (s, 4H); <sup>13</sup>C NMR (125 MHz, DMSO<sub>d-6</sub>) δ 167.5, 152.6 (d, *J* = 230 Hz), 146.8, 120.1 (d, *J* = 22.5 Hz), 117.9 (d, *J* = 7.5 Hz), 113.5 (d, *J* = 22.5 Hz), 112.0 (d, *J* = 5.0 Hz); <sup>19</sup>F NMR (471 MHz DMSO<sub>d-6</sub>) δ -129.7; RMS (ESI) m/z calcd for C<sub>14</sub>H<sub>13</sub>F<sub>2</sub>N<sub>4</sub>O<sub>2</sub><sup>+</sup> (M+H)<sup>+</sup> 307.1001, found 307.1009.

**2-amino-N'-(2-amino-5-chlorobenzoyl)-5-chlorobenzohydrazide (1c)**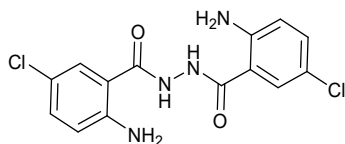

Flash column chromatography on silica gel gave the product (473.2 mg, 70% yield) as a white solid: M.p. 255-258 °C; <sup>1</sup>H NMR (DMSO<sub>d-6</sub>, 500 MHz) δ 10.22 (s, 2H), 7.65 (s, 2H), 7.23 (d, *J* = 8.5 Hz, 2H), 6.73 (d, *J* = 9.0 Hz, 2H), 6.55 (s, 4H); <sup>13</sup>C NMR (125 MHz, DMSO<sub>d-6</sub>) δ 167.3, 148.8, 132.2, 127.5, 118.2, 117.8, 113.2; HRMS (ESI) m/z calcd for C<sub>14</sub>H<sub>13</sub>Cl<sub>2</sub>N<sub>4</sub>O<sub>2</sub><sup>+</sup> (M+H)<sup>+</sup> 339.0410, found 339.0419.

**2-amino-N'-(2-amino-5-bromobenzoyl)-5-bromobenzohydrazide (1d)**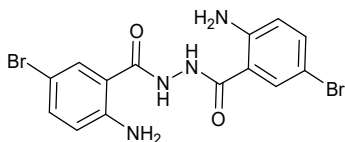

Flash column chromatography on silica gel gave the product (707.0 mg, 83% yield) as a white solid: M.p. 239-240 °C; <sup>1</sup>H NMR (DMSO<sub>d-6</sub>, 500 MHz) δ 10.23 (s, 2H), 7.76 (s, 2H), 7.33 (d, *J* = 9.0 Hz, 2H), 6.72 (d, *J* = 9.0 Hz, 2H), 6.57 (s, 4H); <sup>13</sup>C NMR (125 MHz, DMSO<sub>d-6</sub>) δ 167.2, 149.1, 134.8, 130.3, 118.6, 113.9, 104.9; HRMS (ESI) m/z calcd for C<sub>14</sub>H<sub>13</sub>Br<sub>2</sub>N<sub>4</sub>O<sub>2</sub><sup>+</sup> (M+H)<sup>+</sup> 426.9400, found 426.9407.

### 2-amino-*N'*-(2-amino-5-methylbenzoyl)-5-methylbenzohydrazide (1e)

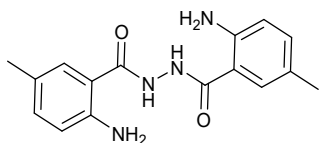

Flash column chromatography on silica gel gave the product (298.1 mg, 50% yield) as a white solid: M.p. 236-239 °C; <sup>1</sup>H NMR (DMSO<sub>d-6</sub>, 500 MHz) δ 9.98 (s, 2H), 7.44 (s, 2H), 7.24 (d, *J* = 8.5 Hz, 2H), 6.65 (d, *J* = 8.0 Hz, 2H), 6.18 (s, 4H), 2.18 (s, 6H); <sup>13</sup>C NMR (125 MHz, DMSO<sub>d-6</sub>) δ 168.5, 147.6, 133.1, 128.2, 123.0, 116.5, 112.8, 20.0; HRMS (ESI) *m/z* calcd for C<sub>16</sub>H<sub>19</sub>N<sub>4</sub>O<sub>2</sub><sup>+</sup> (M+H)<sup>+</sup> 299.1503, found 299.1495.

### 2-amino-*N'*-(2-amino-4-chlorobenzoyl)-4-chlorobenzohydrazide (1f)

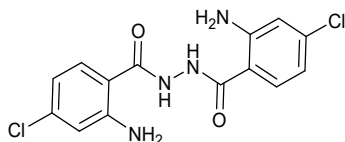

Flash column chromatography on silica gel gave the product (60% yield) as a white solid: mp 274.7-276.1°C; <sup>1</sup>H NMR (DMSO, 500 MHz) δ 10.15 (s, 2H), 7.60 (d, *J* = 8.0 Hz, 2H), 6.81 (s, 2H), 6.68 (s, 4H), 6.57 (d, *J* = 8.5 Hz, 2H); <sup>13</sup>C NMR (125 MHz, CDCl<sub>3</sub>) δ 168.1, 151.6, 137.3, 130.5, 115.6, 114.8, 111.7; HRMS (ESI) *m/z* calcd for C<sub>14</sub>H<sub>13</sub>Cl<sub>2</sub>N<sub>4</sub>O<sub>2</sub><sup>+</sup> (M+H)<sup>+</sup> 339.0410, found 339.0401.

## 6. References

- 1 M. P. Coogan and S. C. Passey *J. Chem. Soc., Perkin Trans. 2*, **2000**, 2060-2066.

## 7. Copies of the $^1\text{H}$ NMR and $^{13}\text{C}$ NMR Spectra

### 2,2'-diphenyl-4*H*,4'*H*-[3,3'-biquinazoline]-4,4'-dione (3aa)

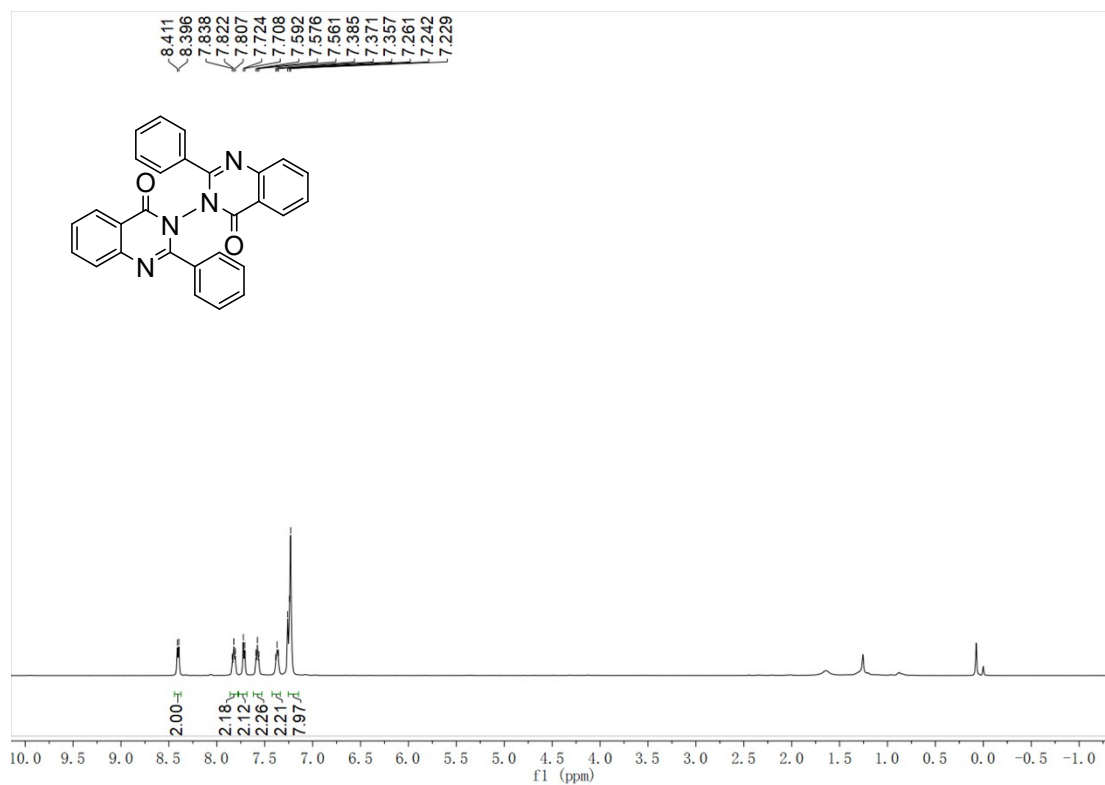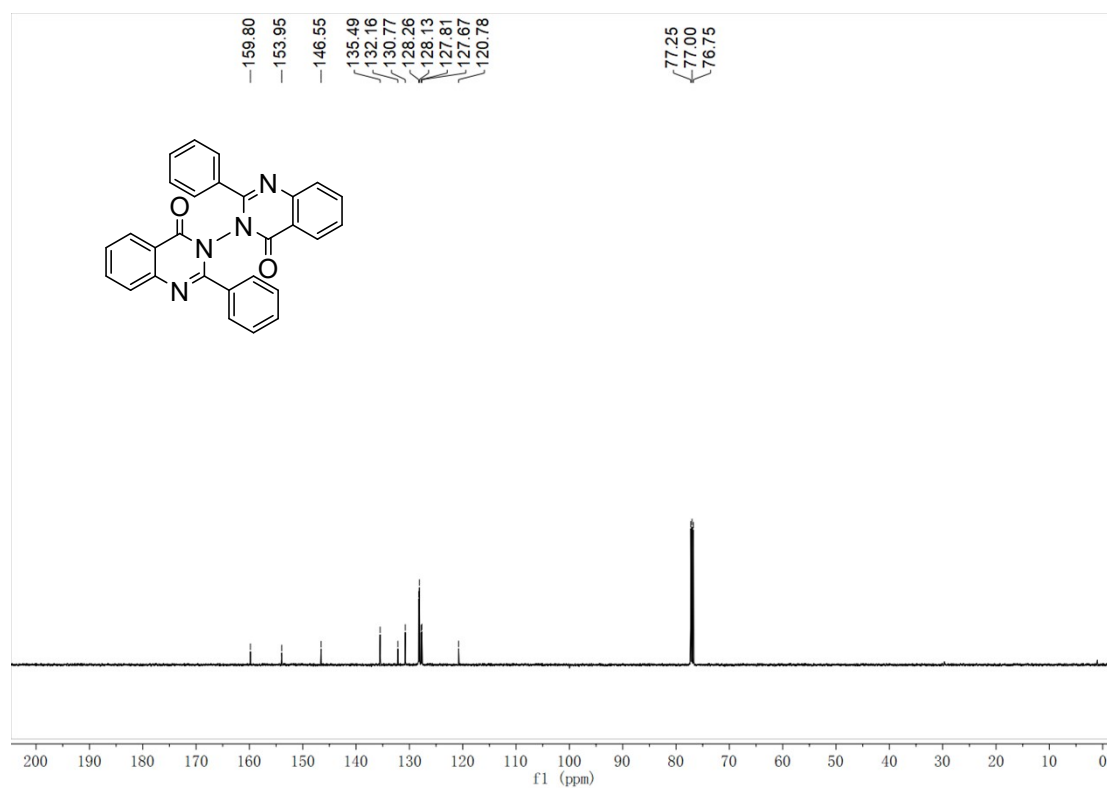

**(S)-2-(6-nitrocyclohexa-2,4-dien-1-yl)-2'-(2-nitrophenyl)-4*H*,4'*H*-[3,3'-  
biquinazoline]-4,4'-dione (3ab)**

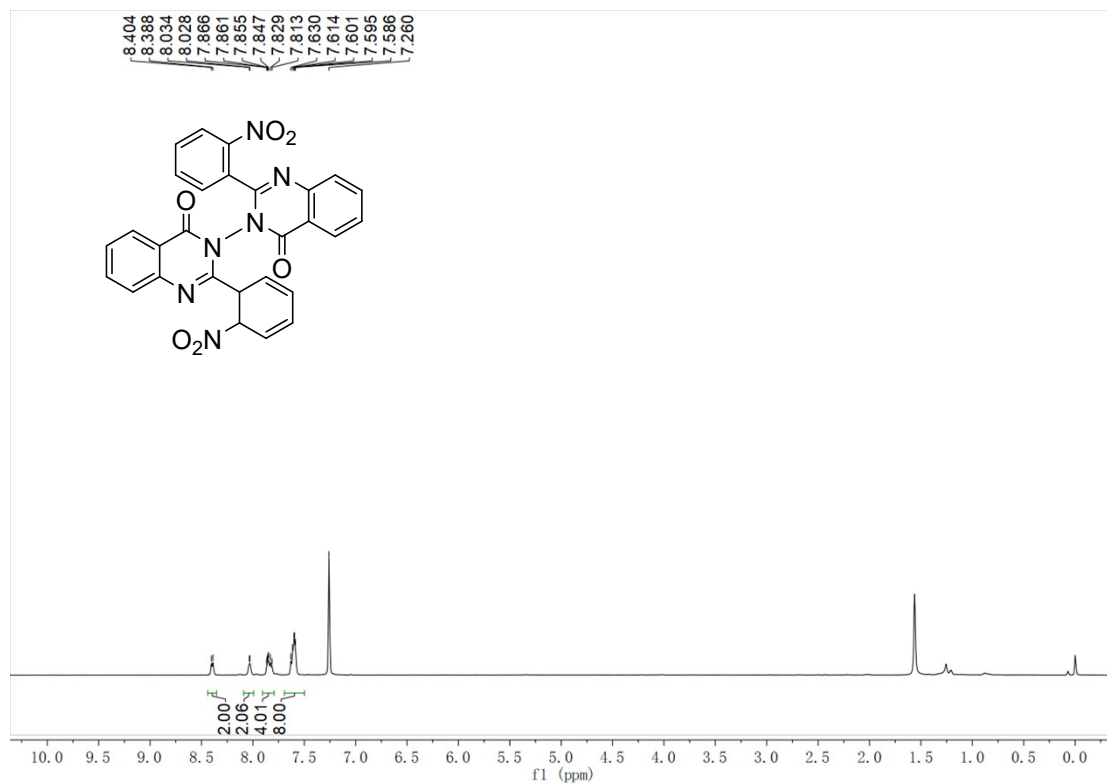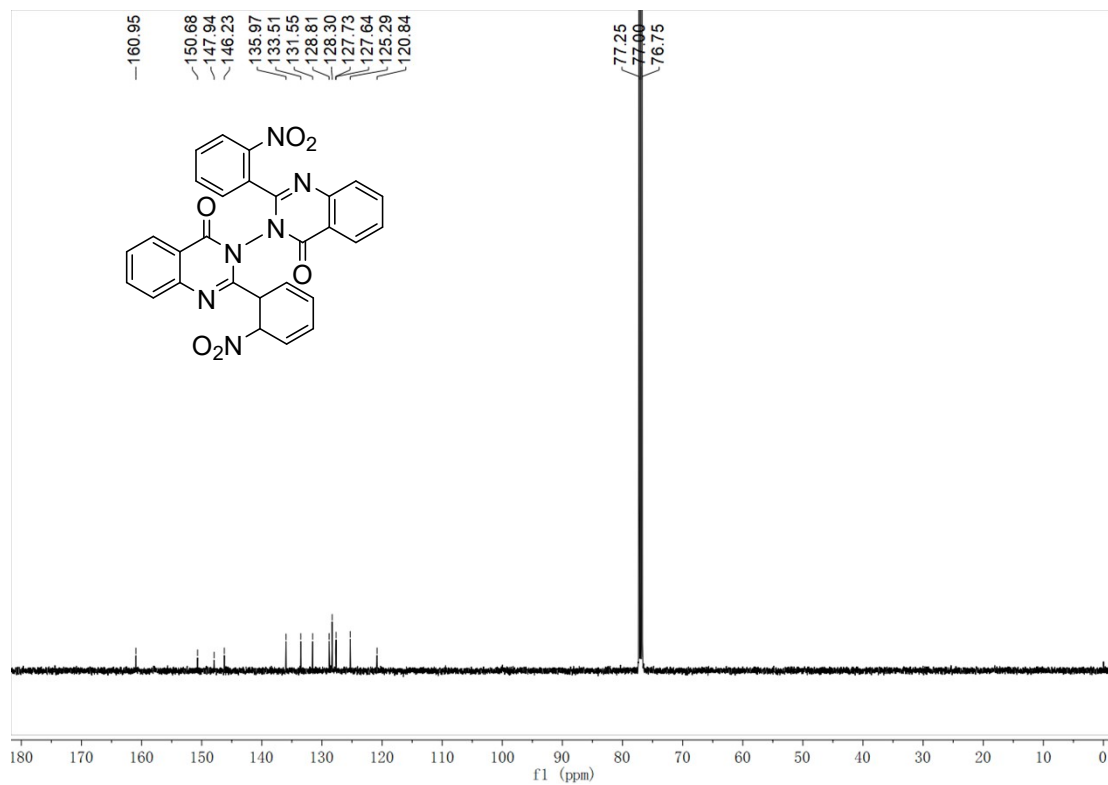

**(S)-2,2'-bis(2-bromophenyl)-4*H*,4'*H*-[3,3'-biquinazoline]-4,4'-dione (3ac)**

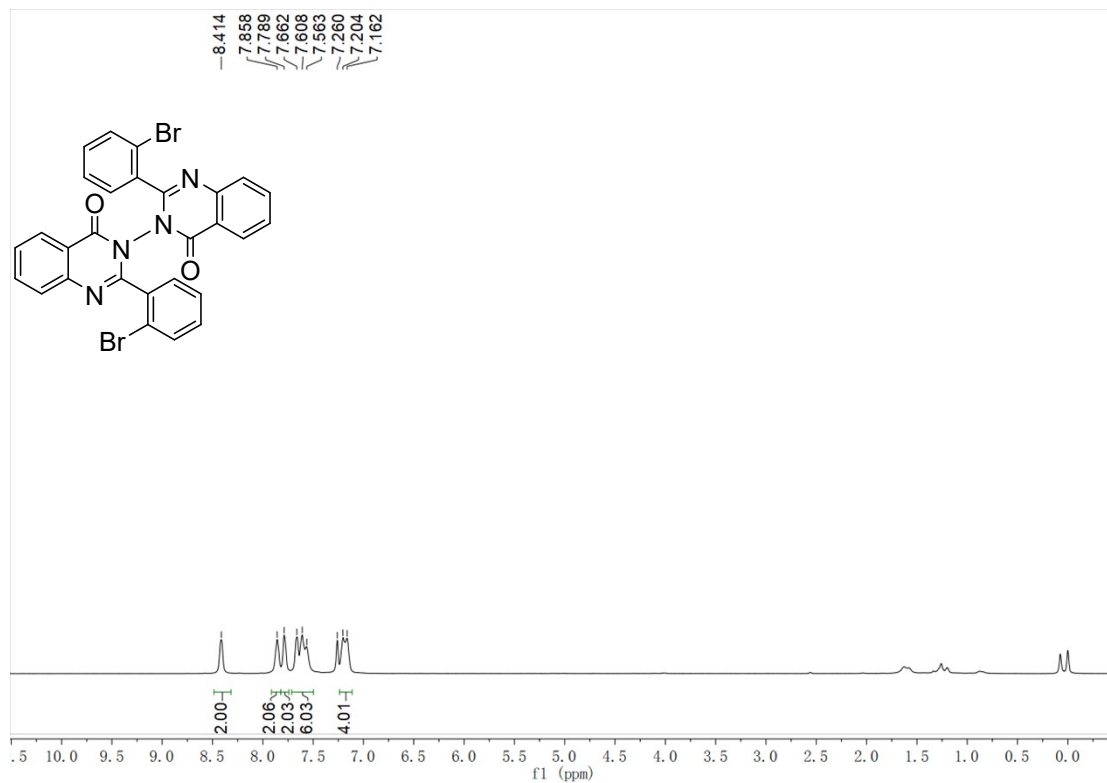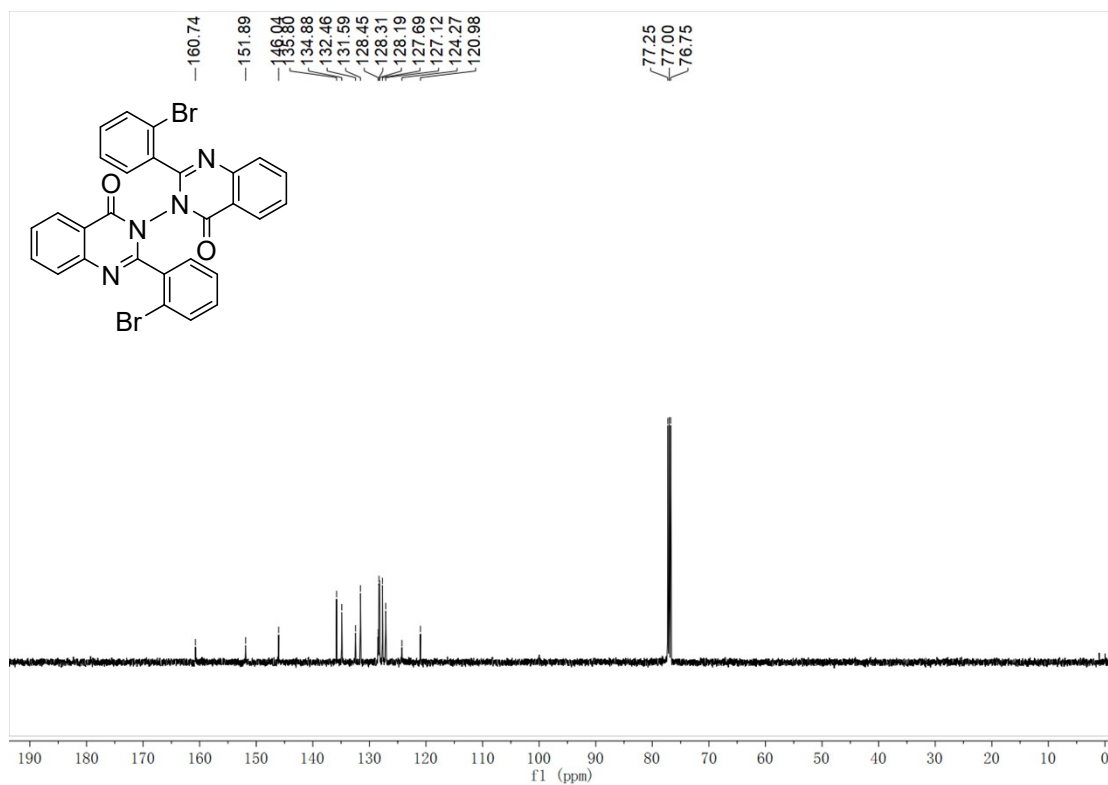

**(S)-2,2'-bis(2-fluorophenyl)-4*H*,4'*H*-[3,3'-biquinazoline]-4,4'-dione (3ad)**

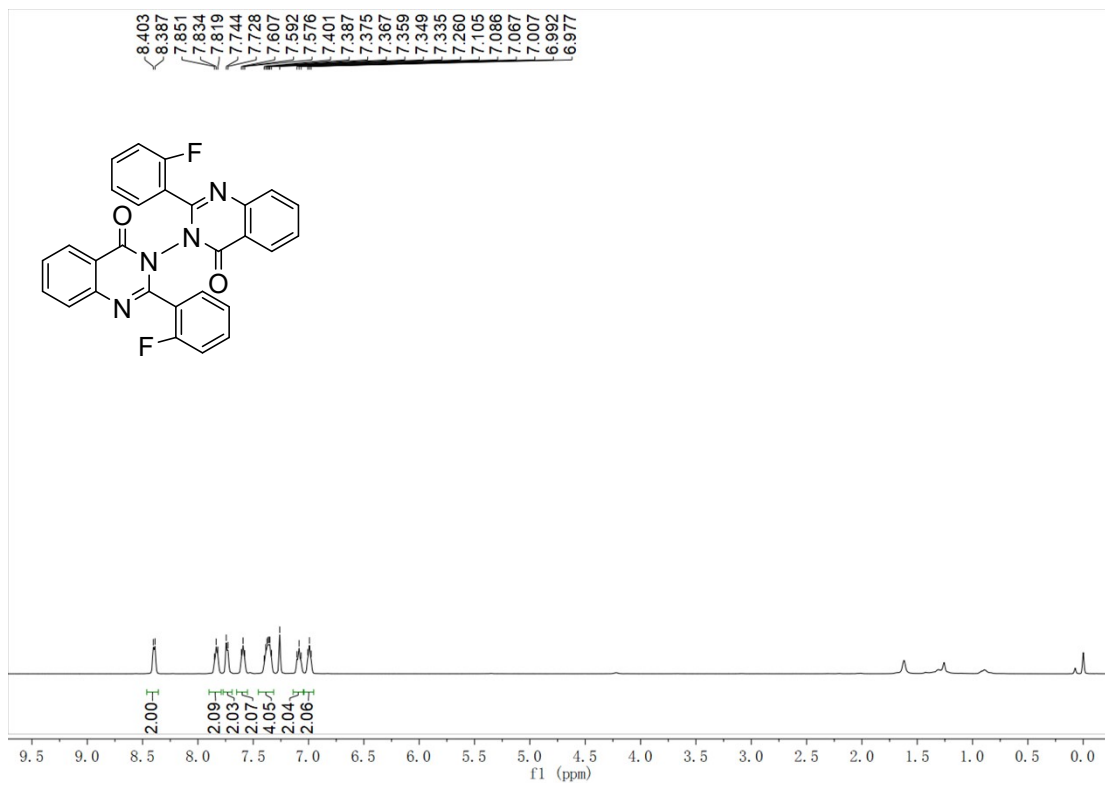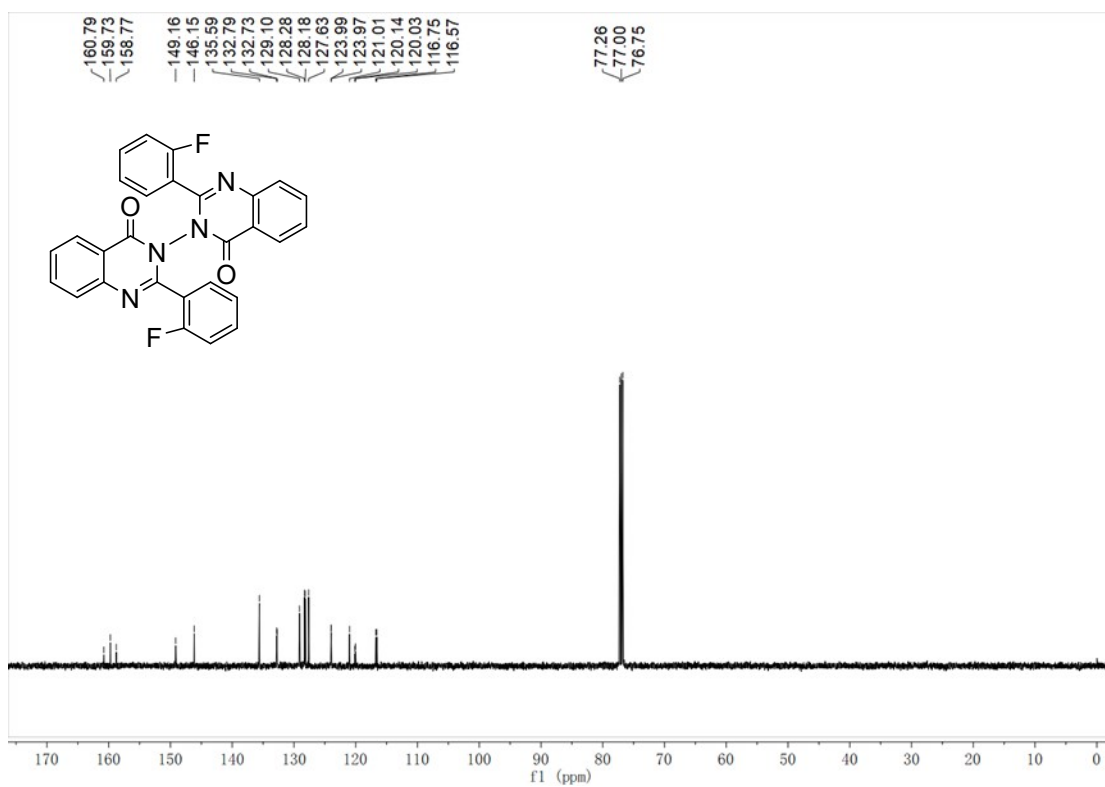

(S)-2,2'-di-o-tolyl-4*H*,4'*H*-[3,3'-biquinazoline]-4,4'-dione (3ae)

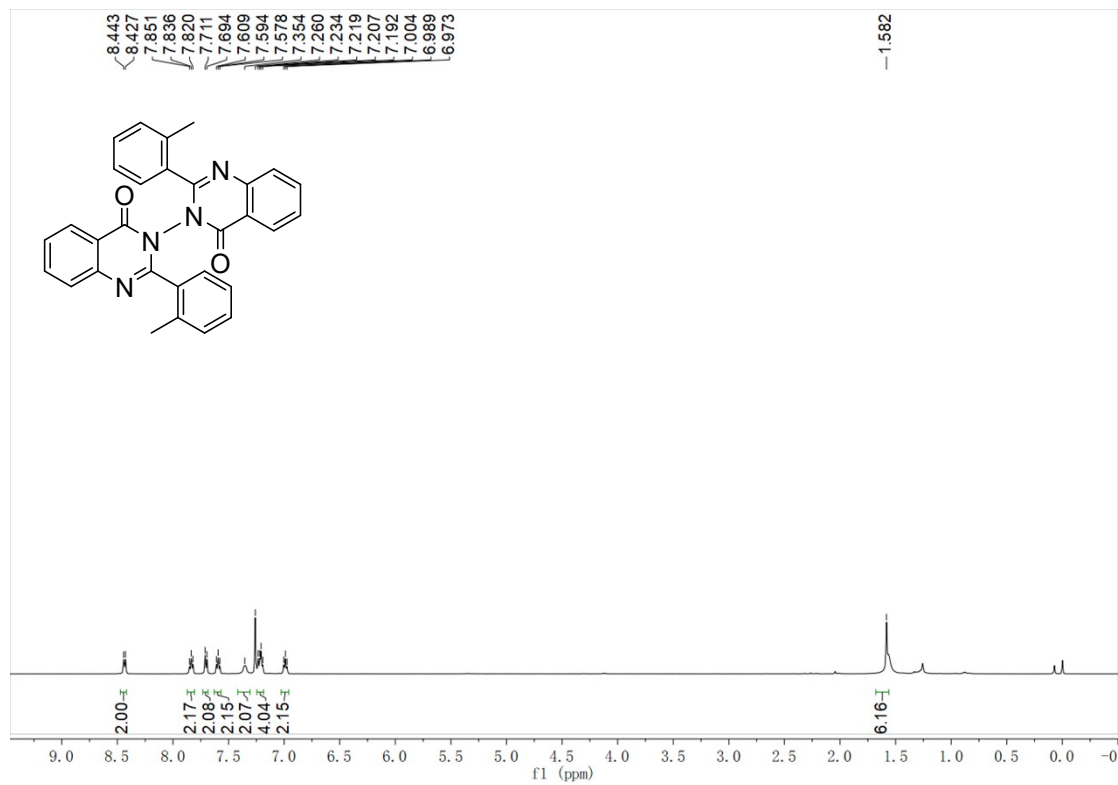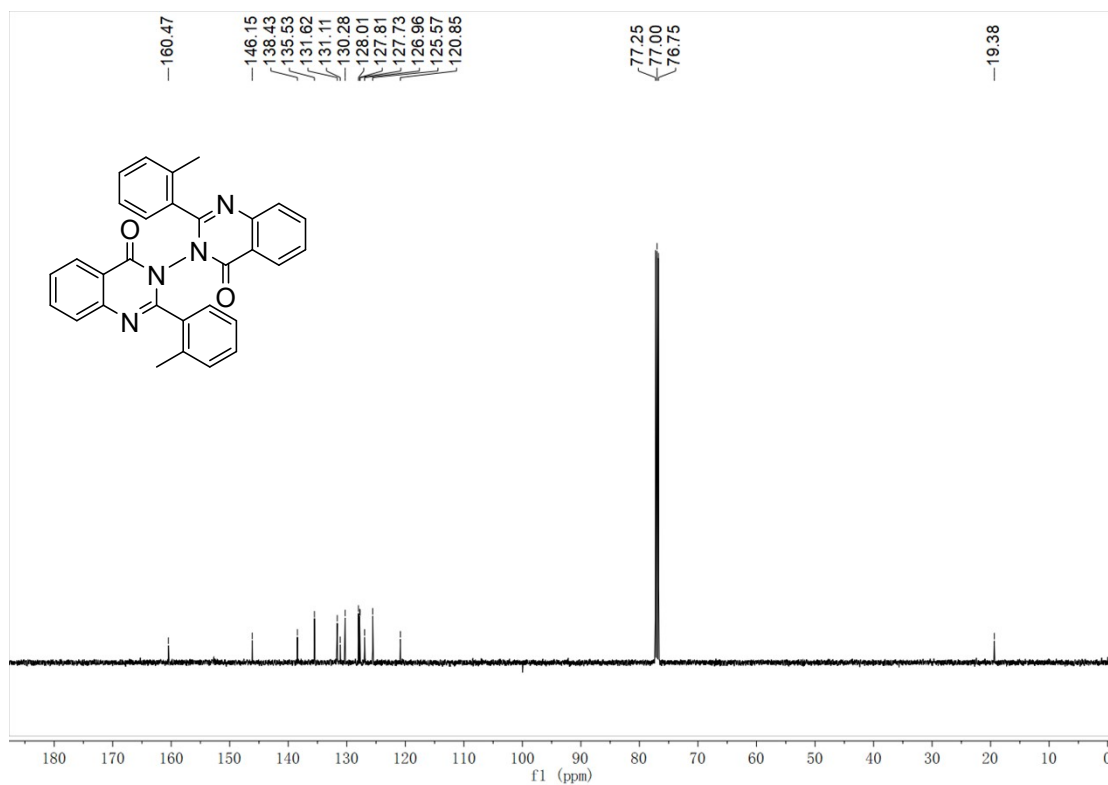



**(S)-2,2'-bis(2-chlorophenyl)-4*H*,4'*H*-[3,3'-biquinazoline]-4,4'-dione (3af)**

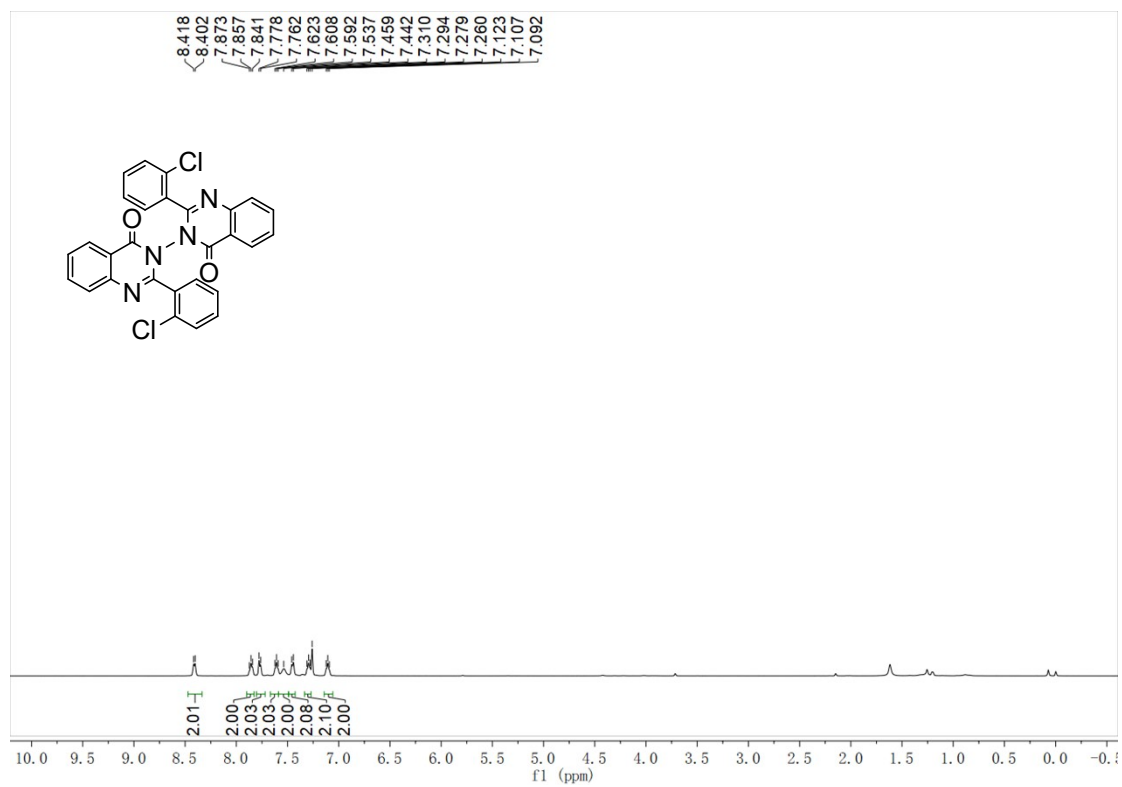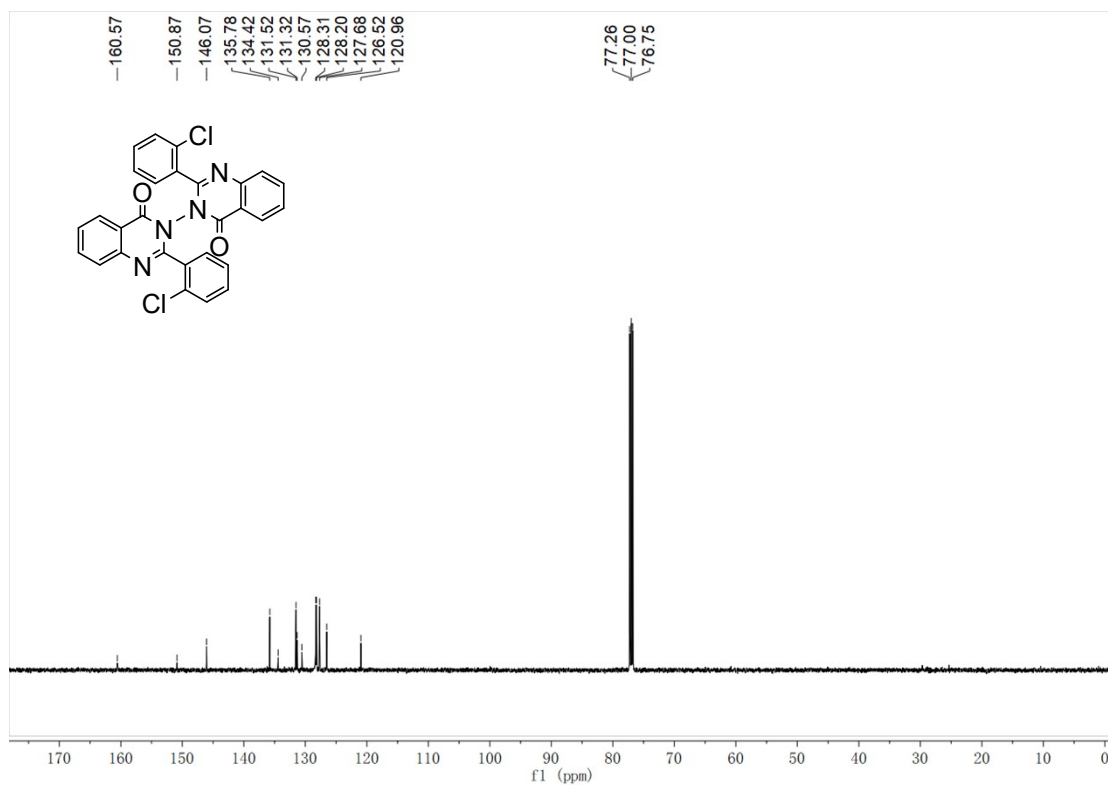

**(S)-2,2'-bis(2-iodophenyl)-4*H*,4'*H*-[3,3'-biquinazoline]-4,4'-dione (3ag)**

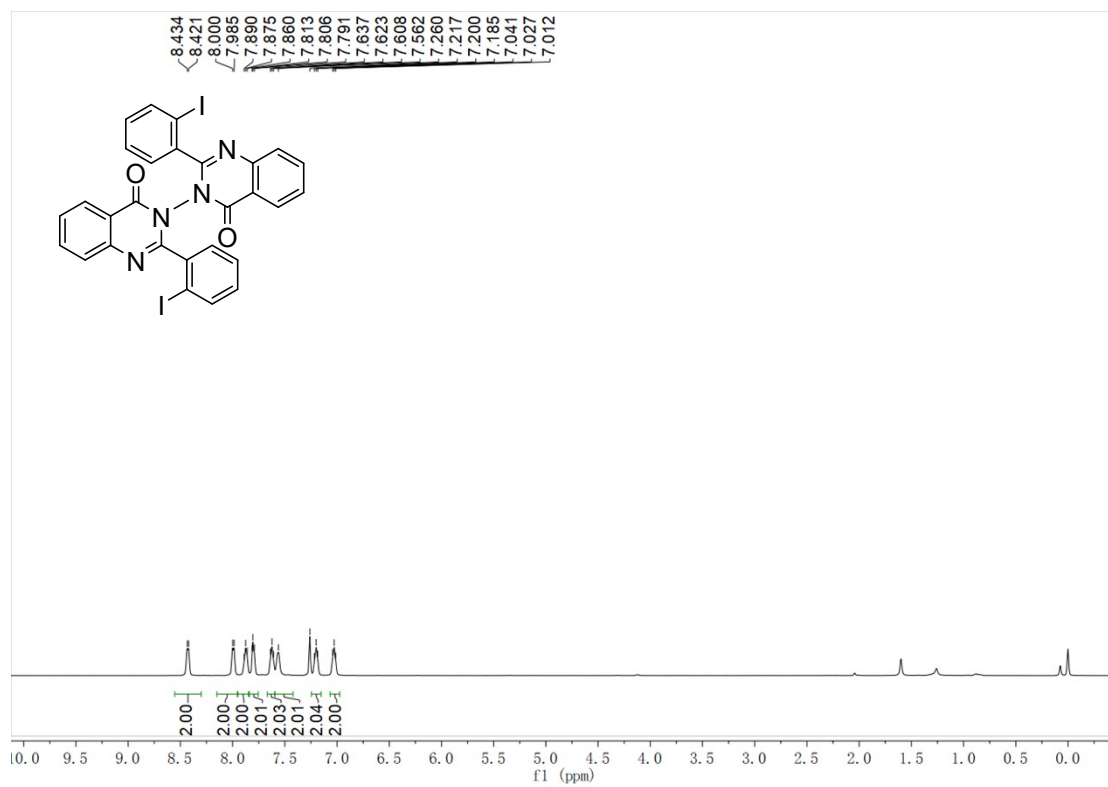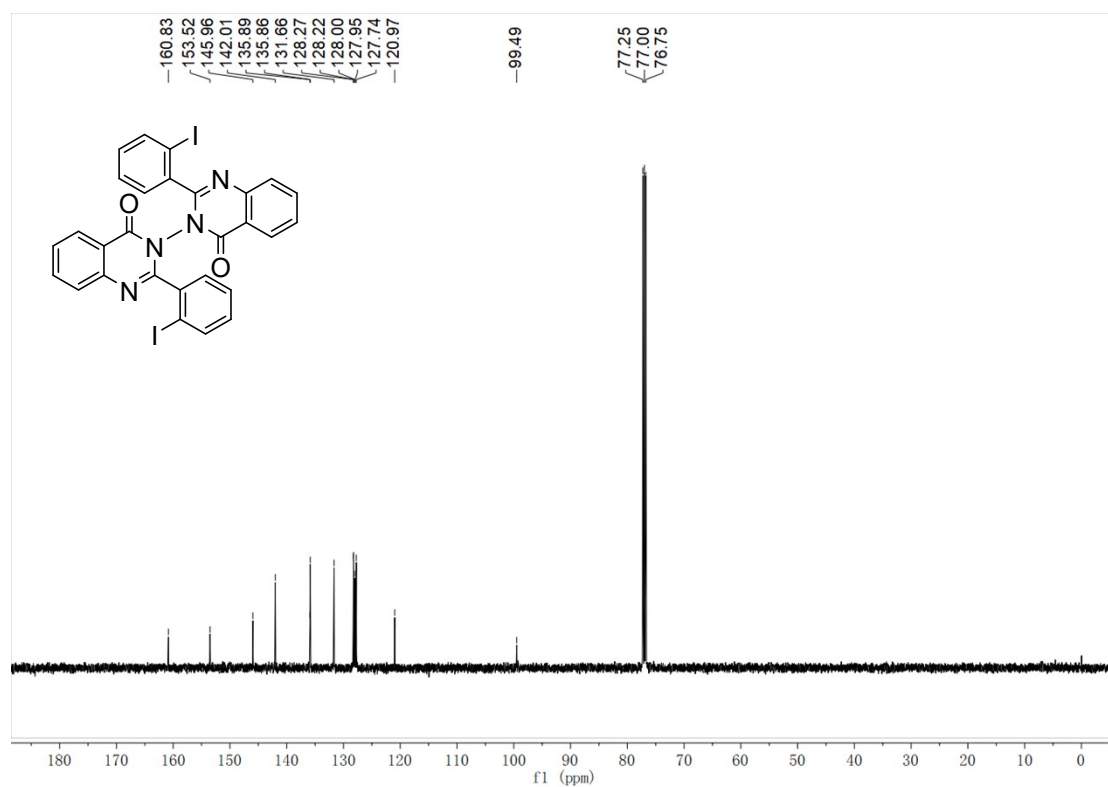

**(S)-2,2'-bis(3-chlorophenyl)-4*H*,4'*H*-[3,3'-biquinazoline]-4,4'-dione (3ah)**

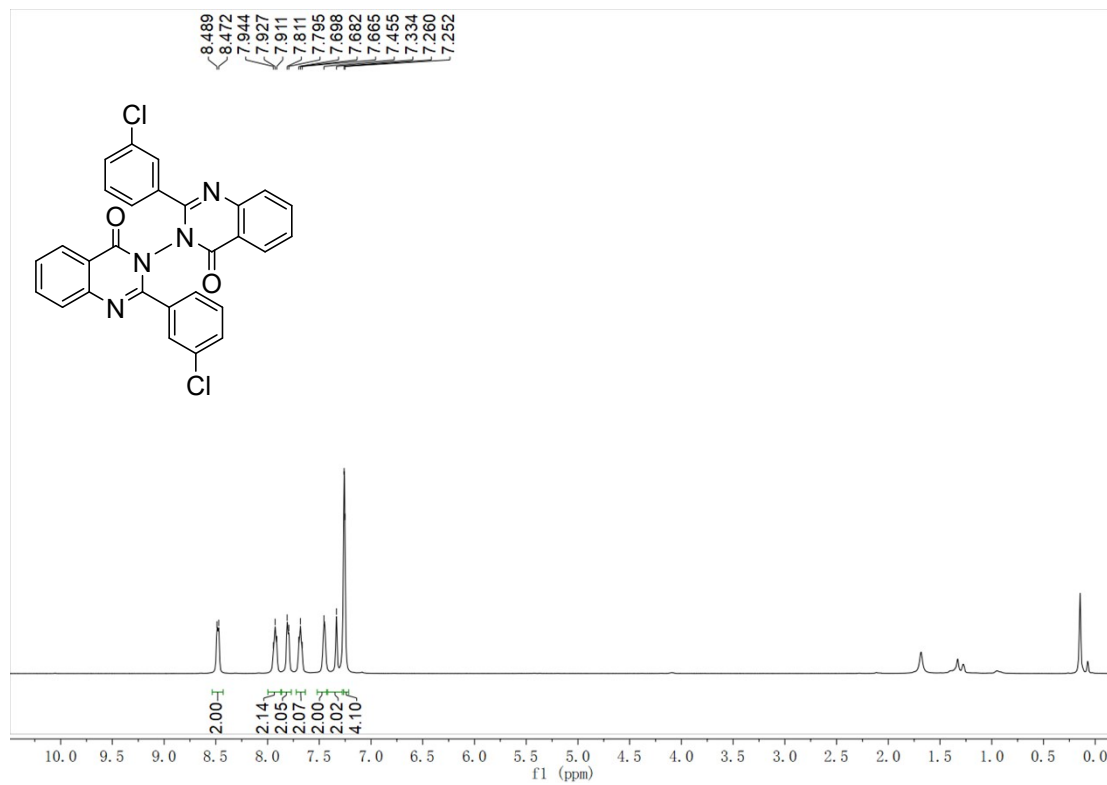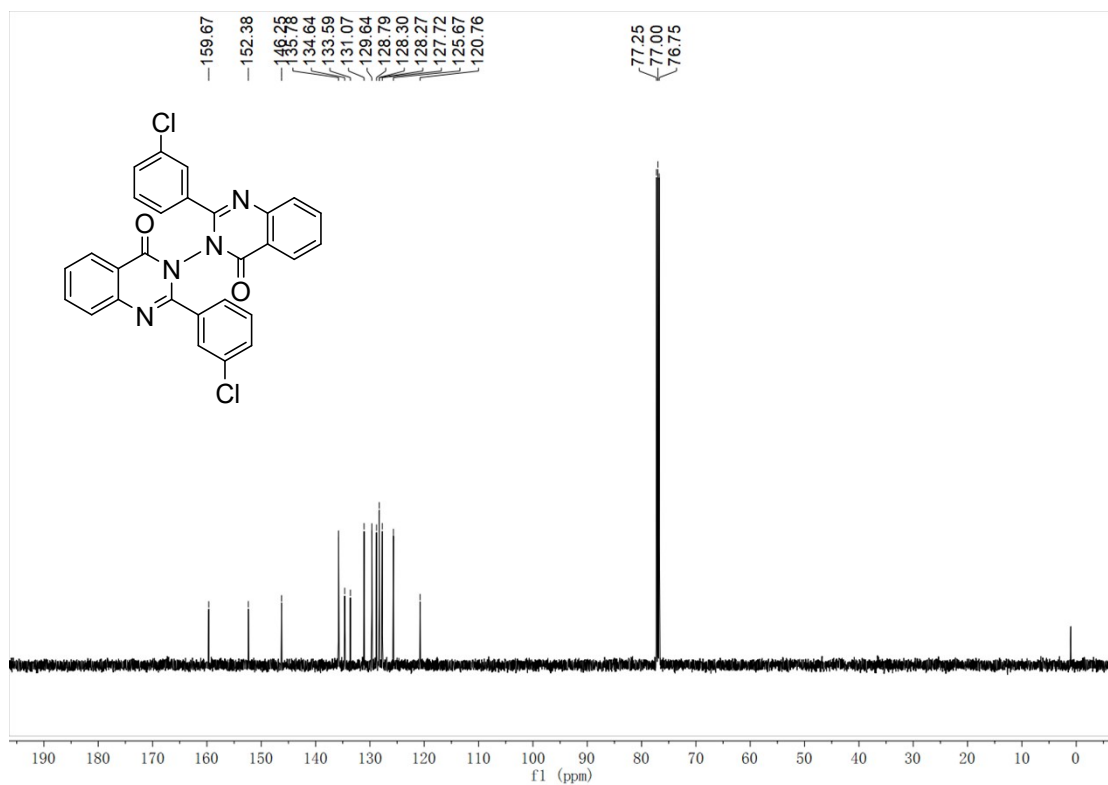

**(S)-2,2'-bis(4-iodophenyl)-4*H*,4'*H*-[3,3'-biquinazoline]-4,4'-dione (3ai)**

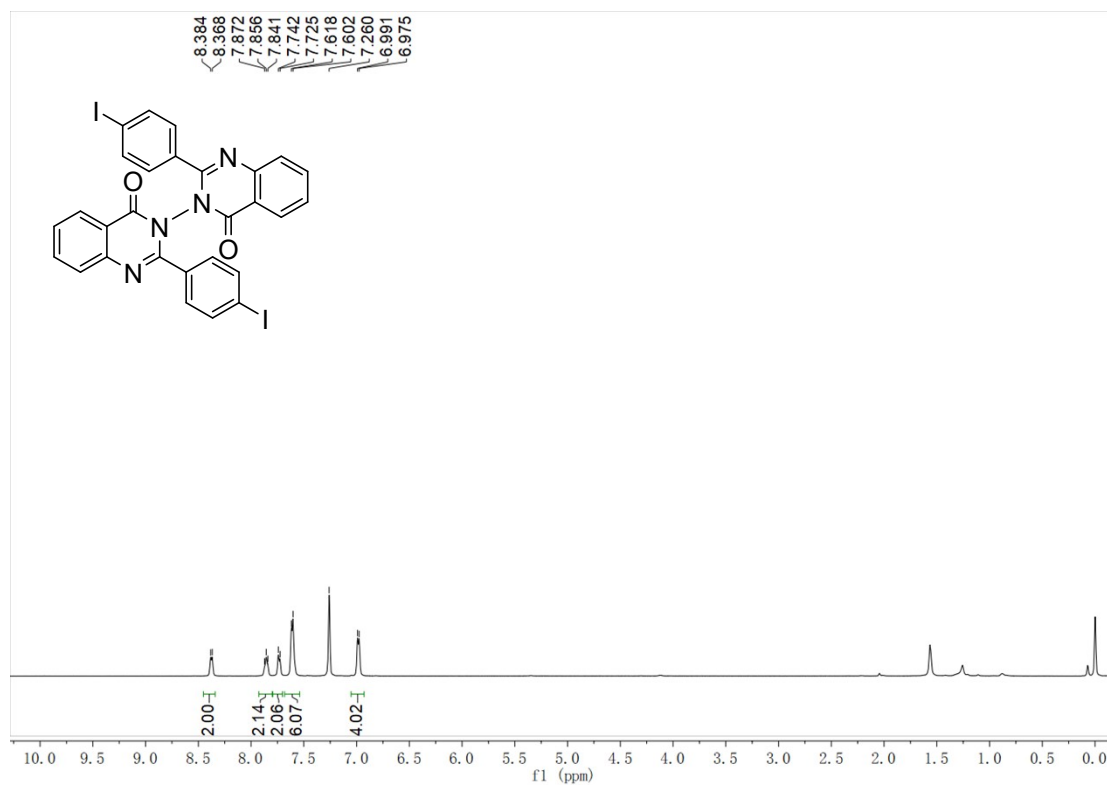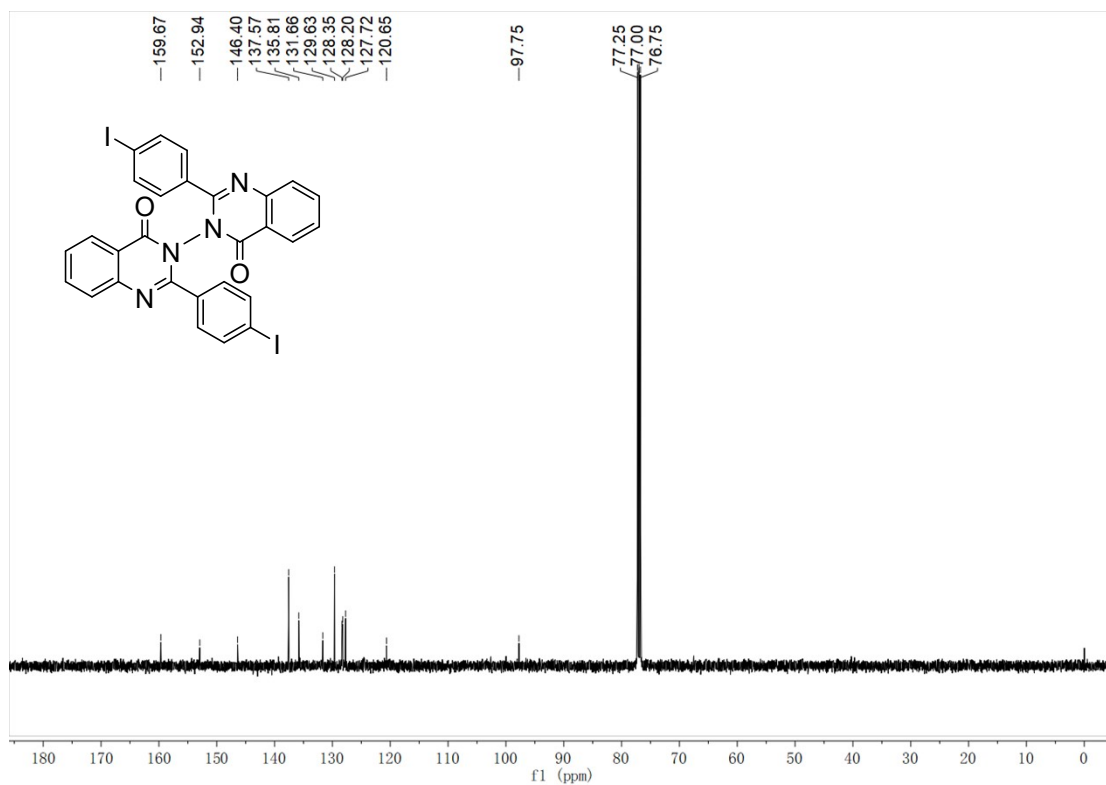

**(S)-2,2'-bis(4-bromophenyl)-4*H*,4'*H*-[3,3'-biquinazoline]-4,4'-dione (3aj)**

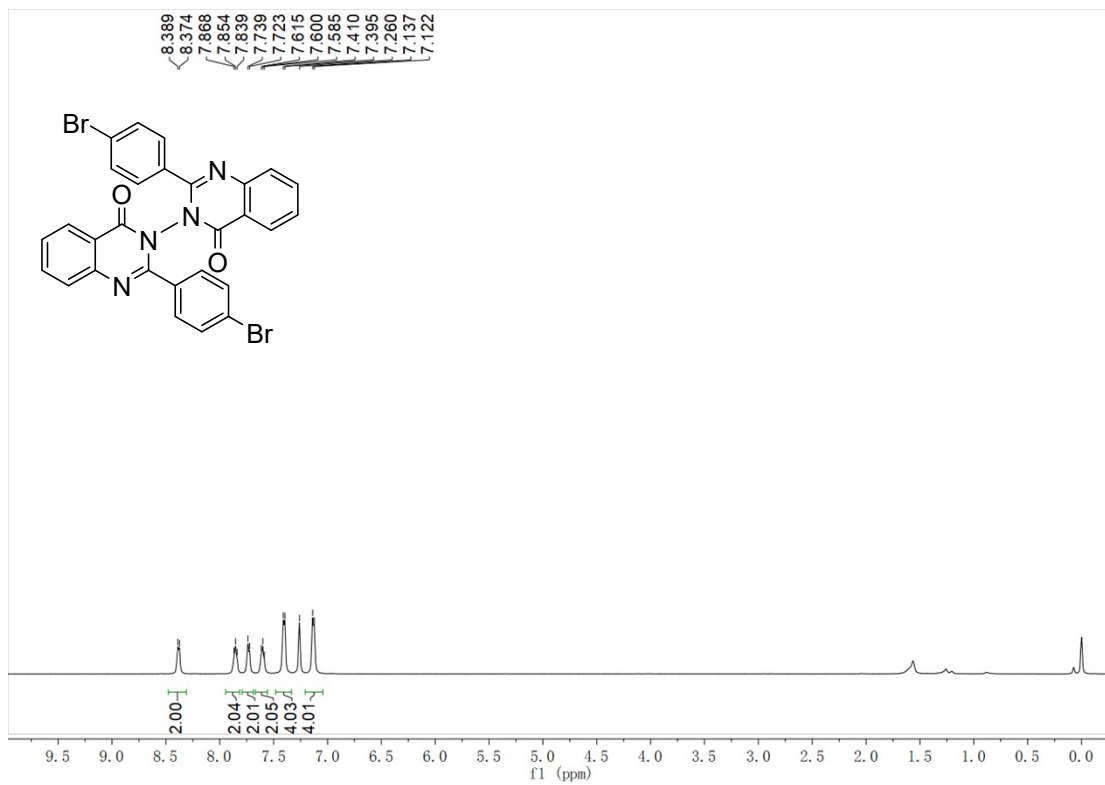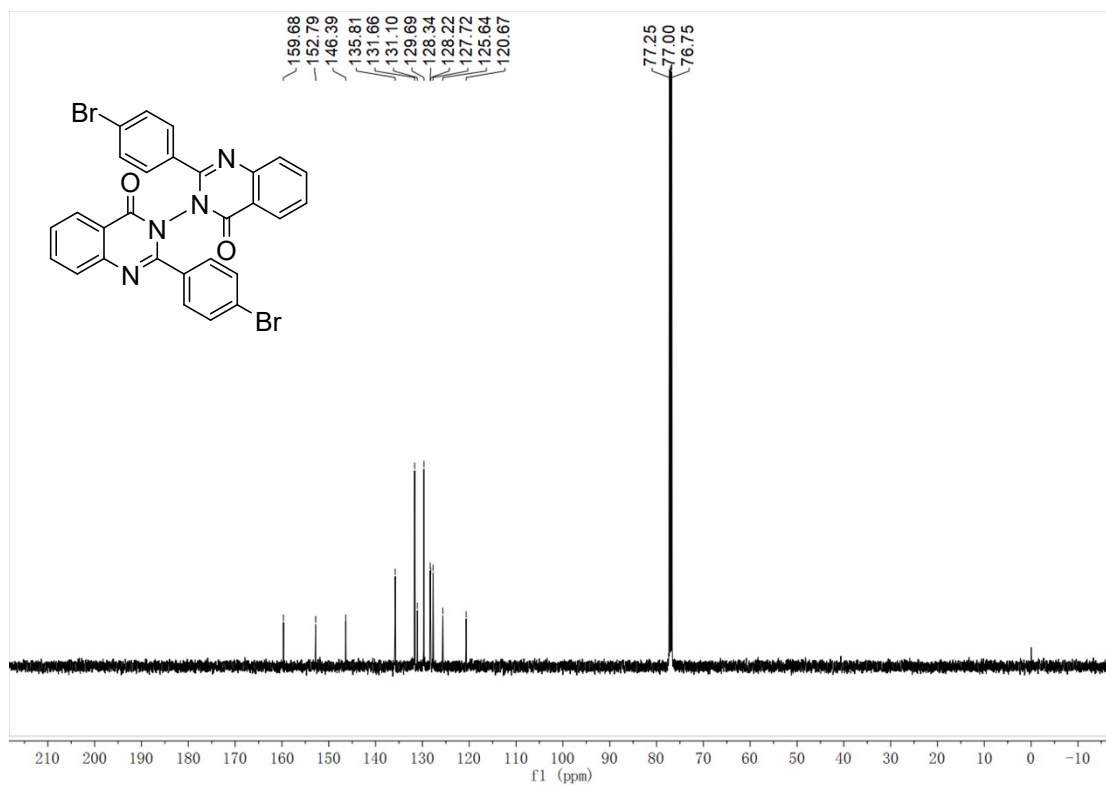

**(S)-2,2'-bis(4-chlorophenyl)-4*H*,4'*H*-[3,3'-biquinazoline]-4,4'-dione (3ak)**

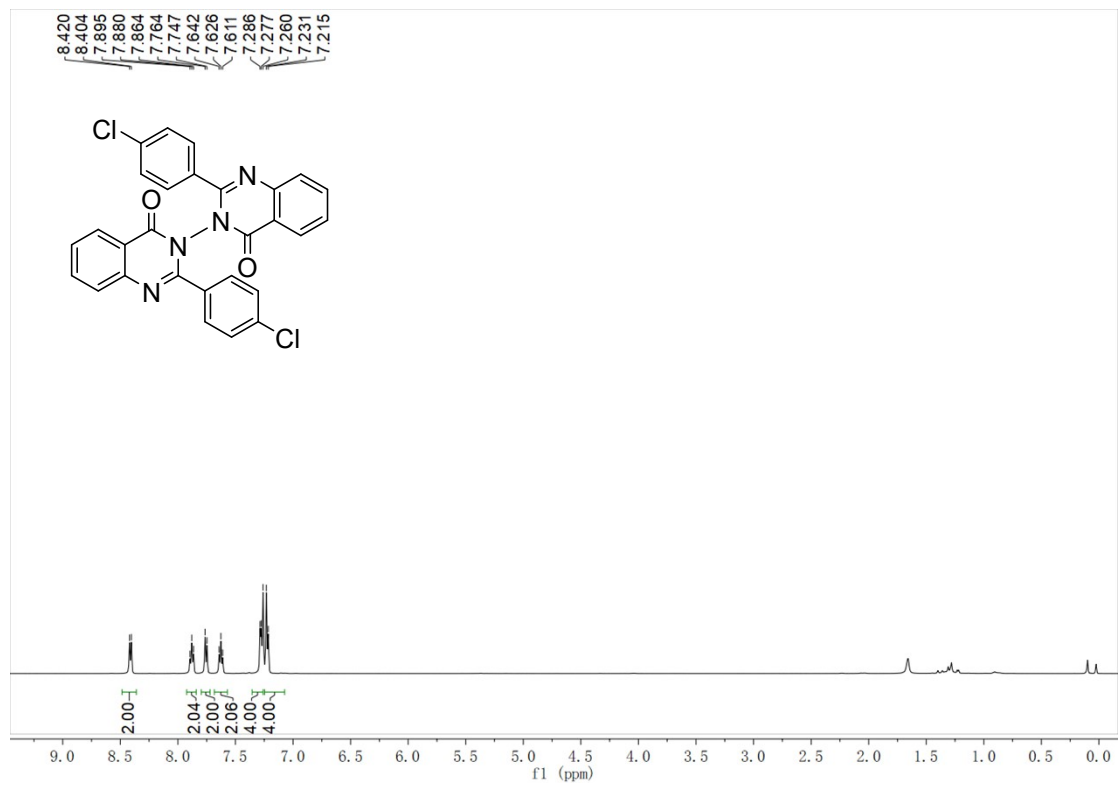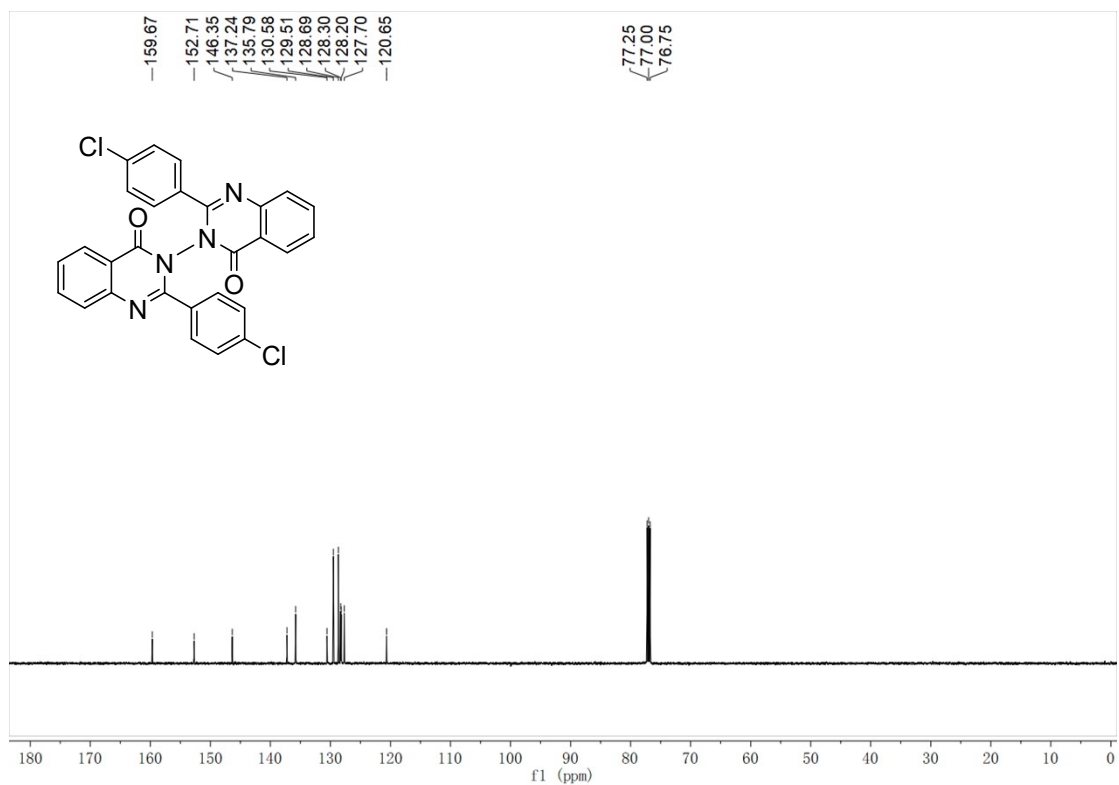

**(S)-2,2'-di-p-tolyl-4H,4'H-[3,3'-biquinazoline]-4,4'-dione (3a)**

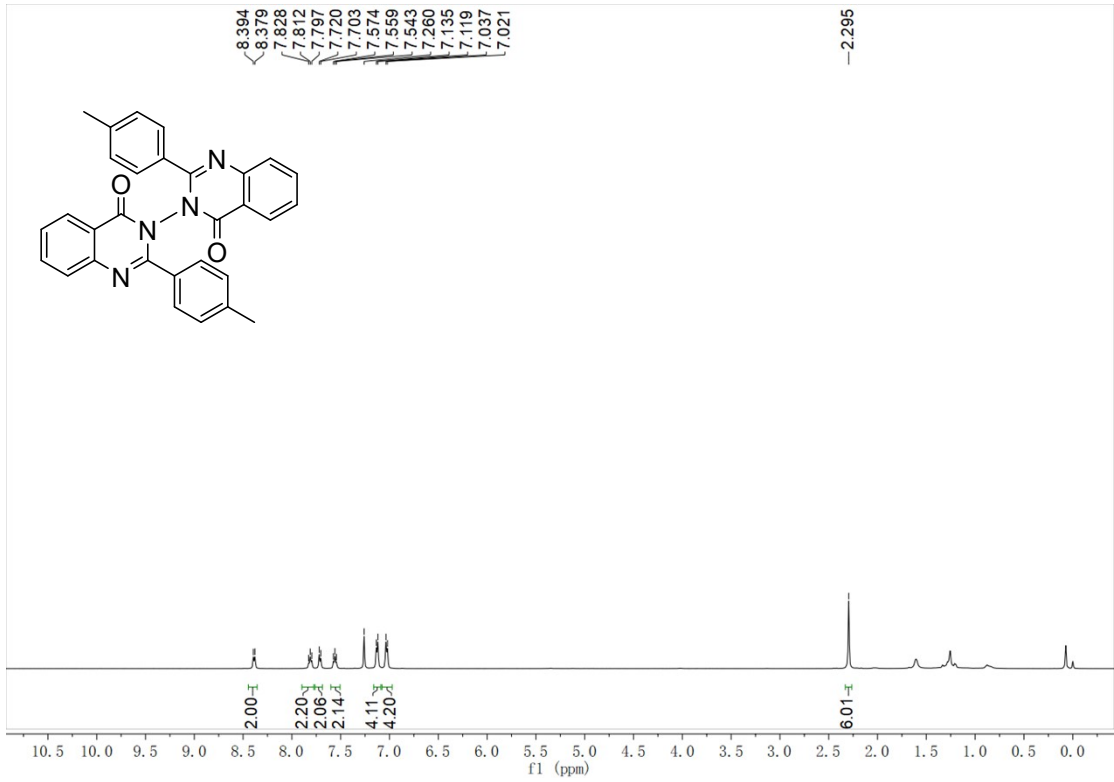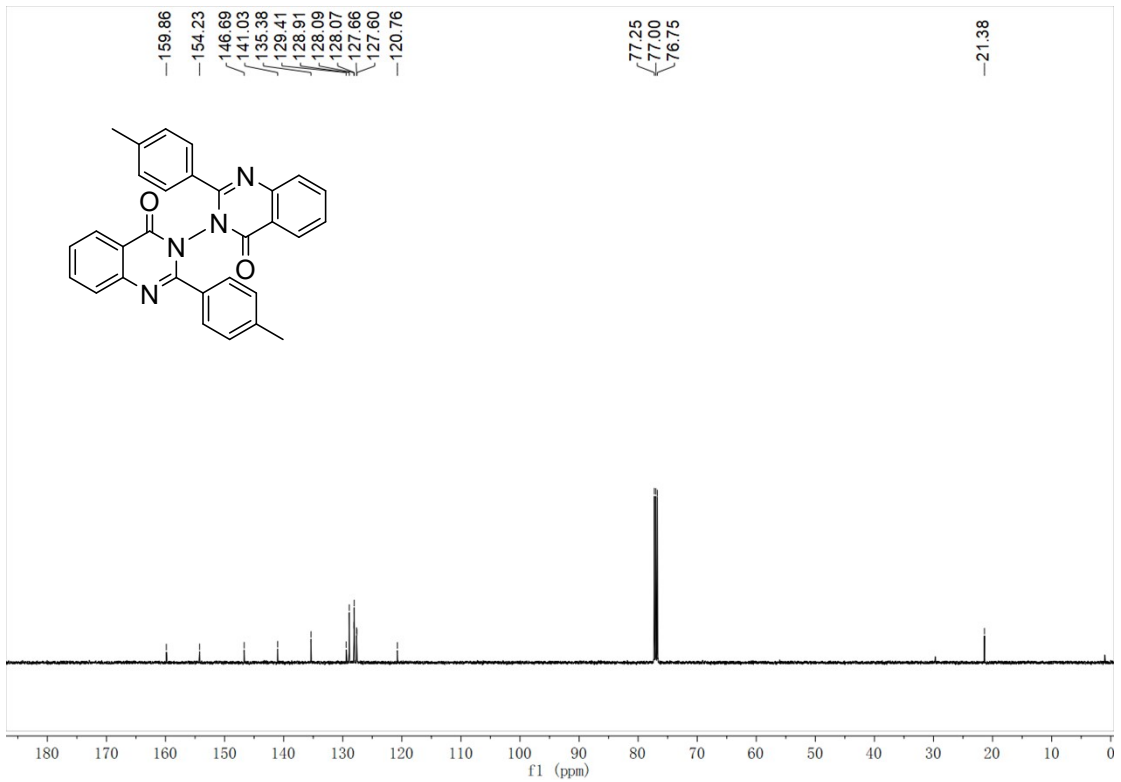

**(S)-2,2'-di(naphthalen-2-yl)-4*H*,4'*H*-[3,3'-biquinazoline]-4,4'-dione (3am)**

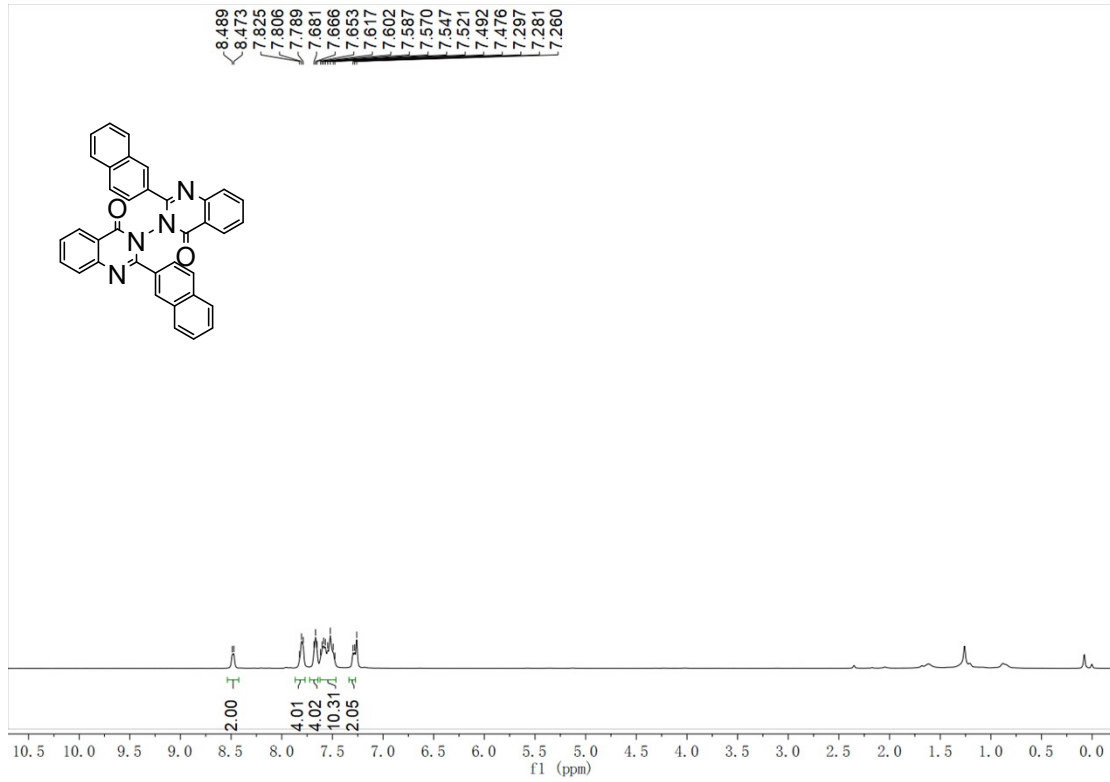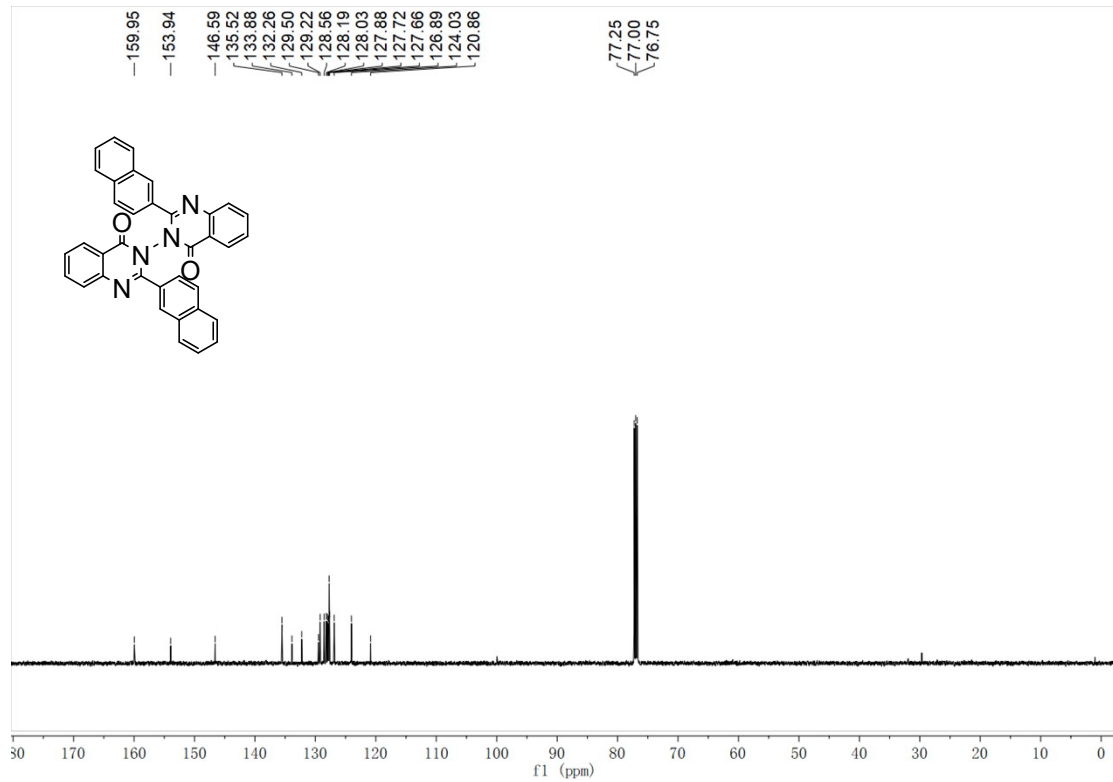



**(S)-2,2'-di(thiophen-2-yl)-4*H*,4'*H*-[3,3'-biquinazoline]-4,4'-dione (3an)**

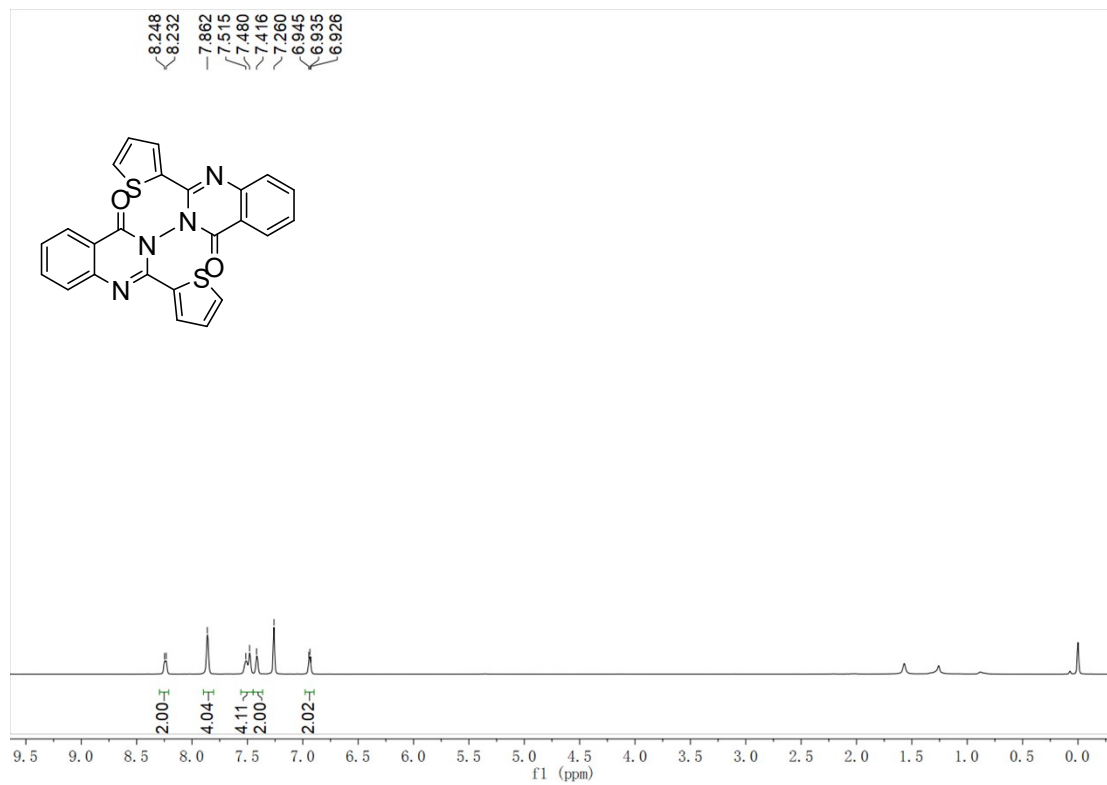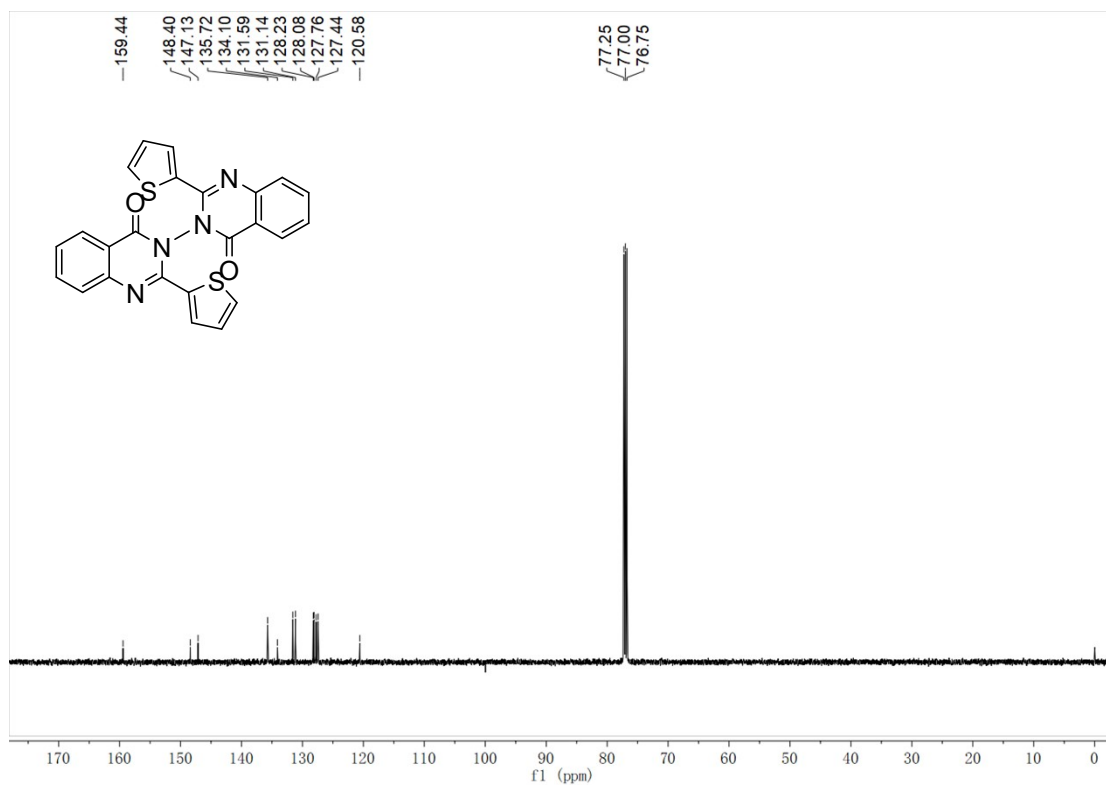

**(S)-2,2'-di(thiophen-3-yl)-4*H*,4'*H*-[3,3'-biquinazoline]-4,4'-dione (3ao)**

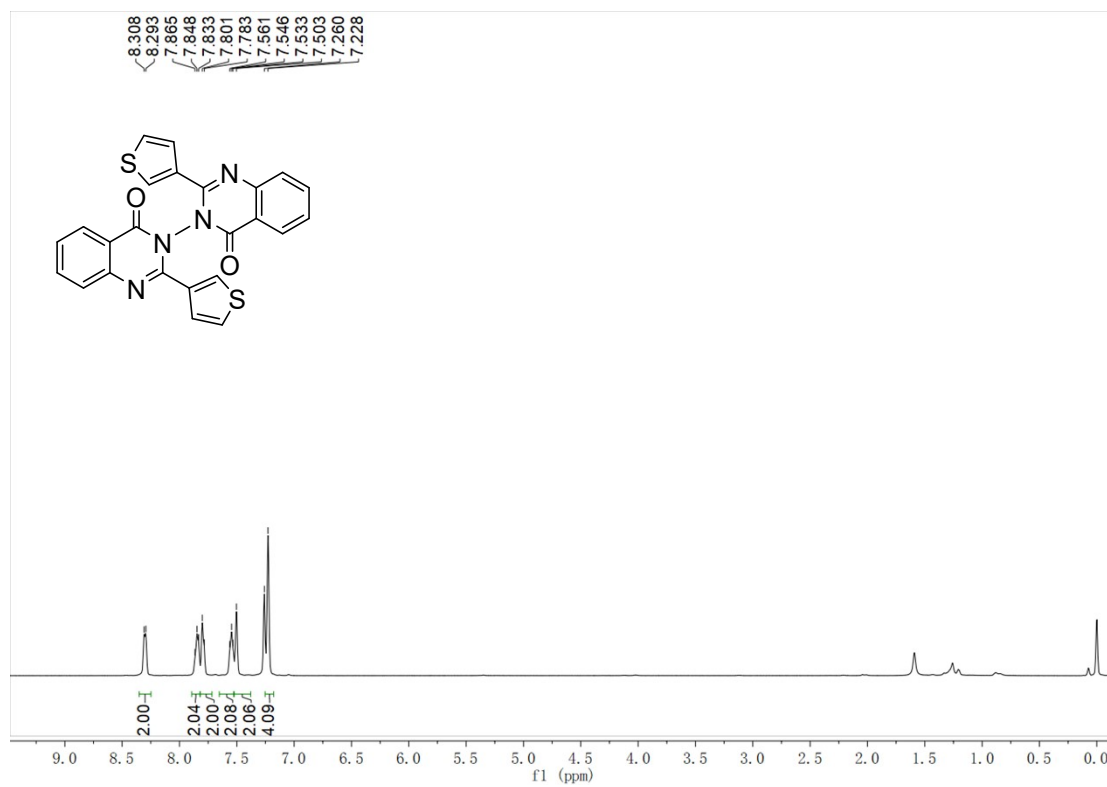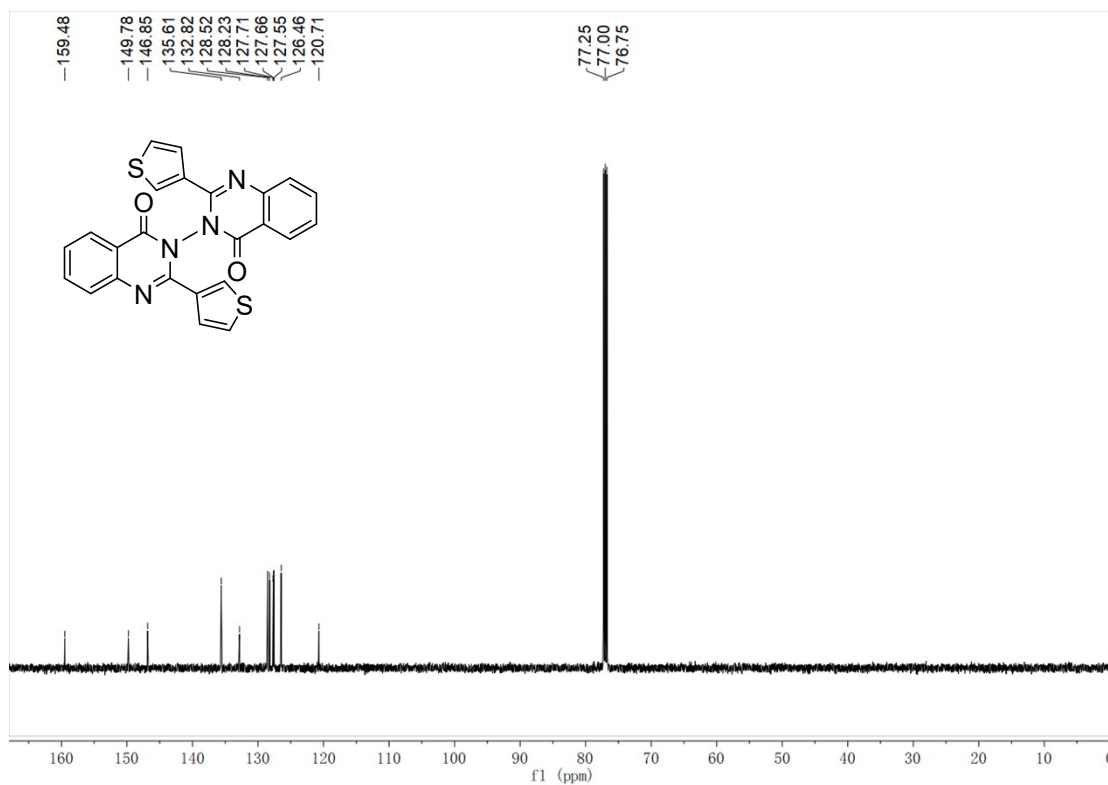

**(S)-6,6'-difluoro-2,2'-diphenyl-4*H*,4'*H*-[3,3'-biquinazoline]-4,4'-dione (3ba)**

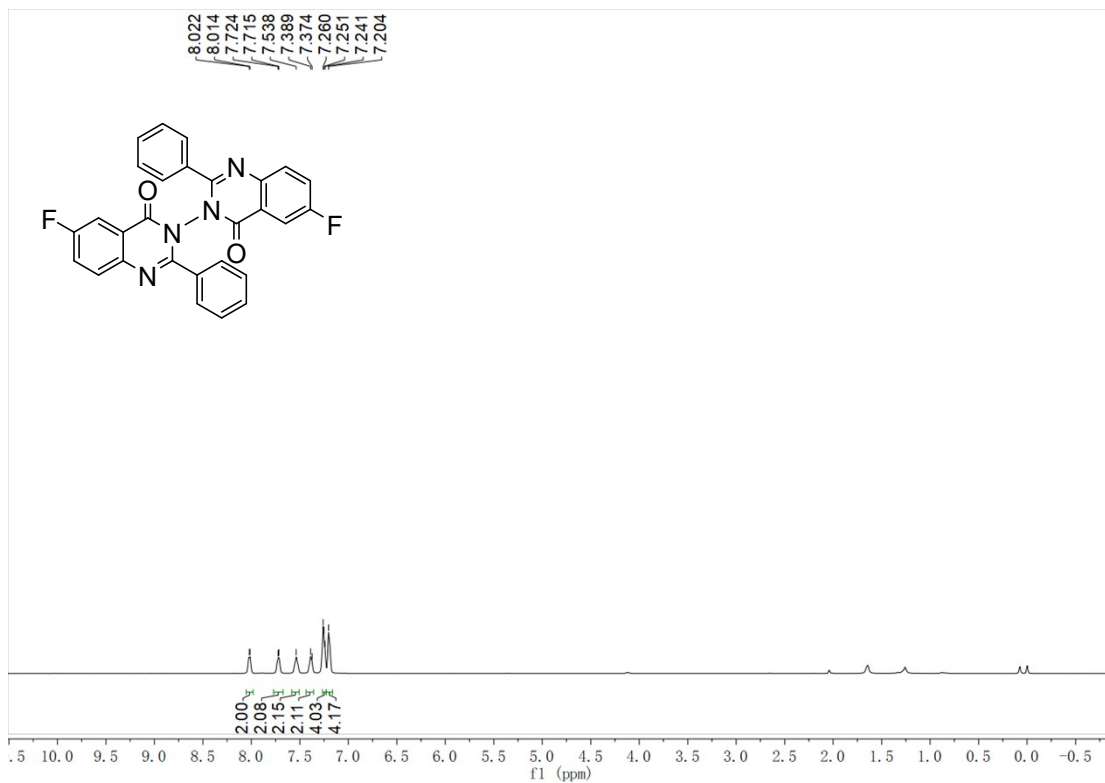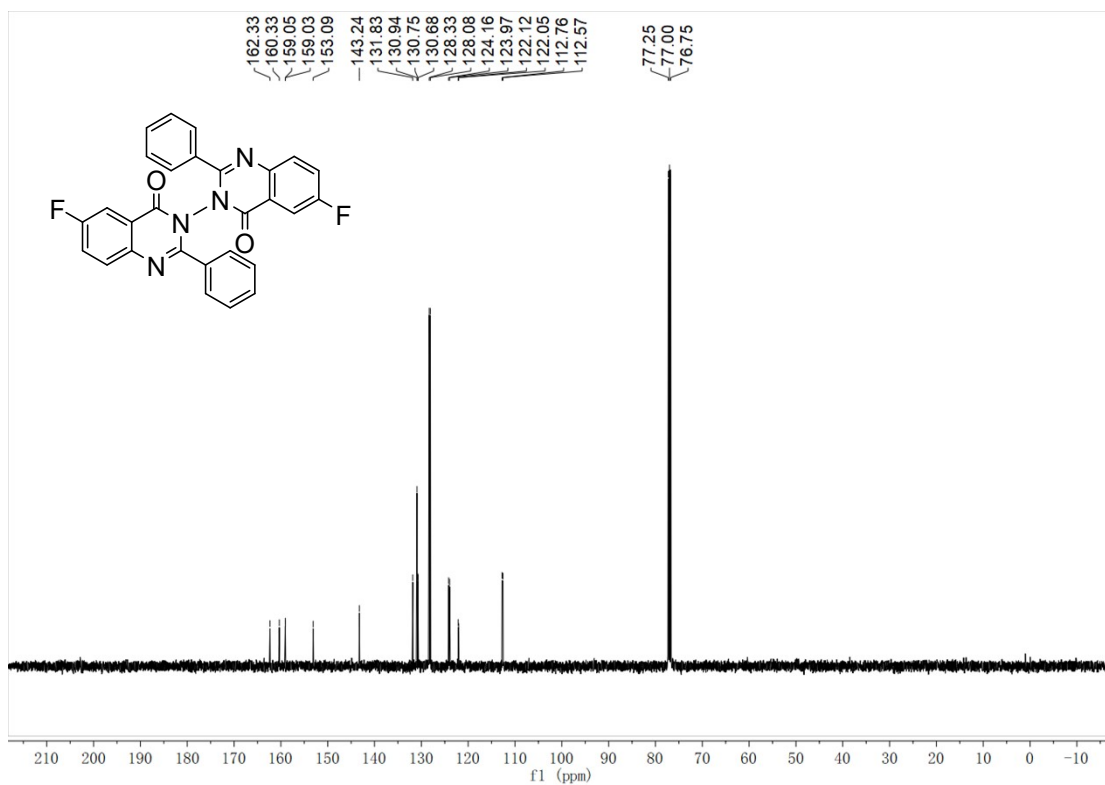

**(S)-6,6'-dichloro-2,2'-diphenyl-4*H*,4'*H*-[3,3'-biquinazoline]-4,4'-dione (3ca)**

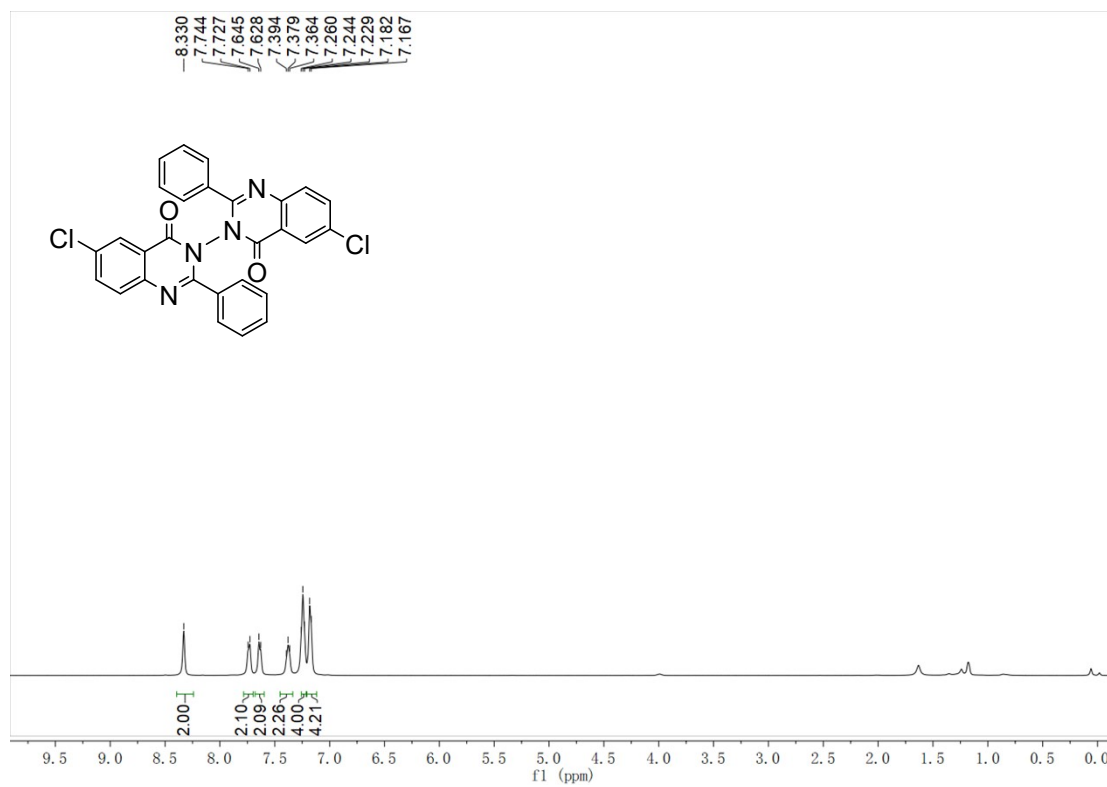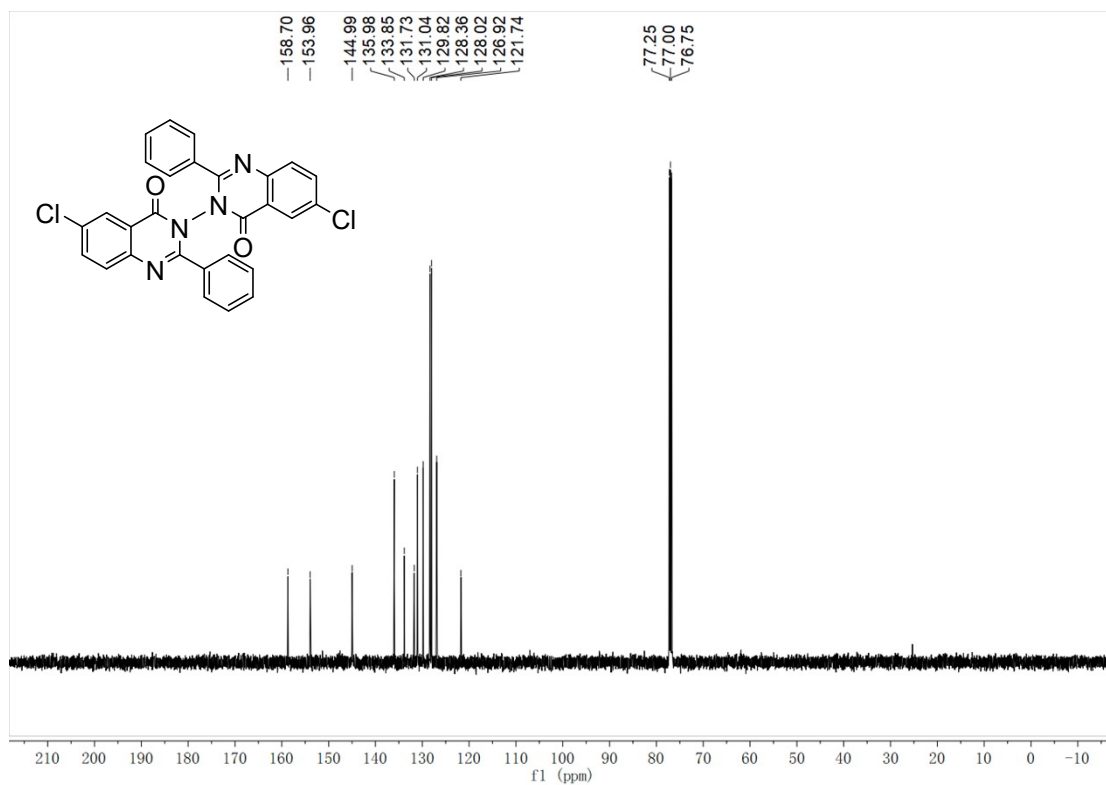

**(S)-6,6'-dibromo-2,2'-diphenyl-4*H*,4'*H*-[3,3'-biquinazoline]-4,4'-dione (3da)**

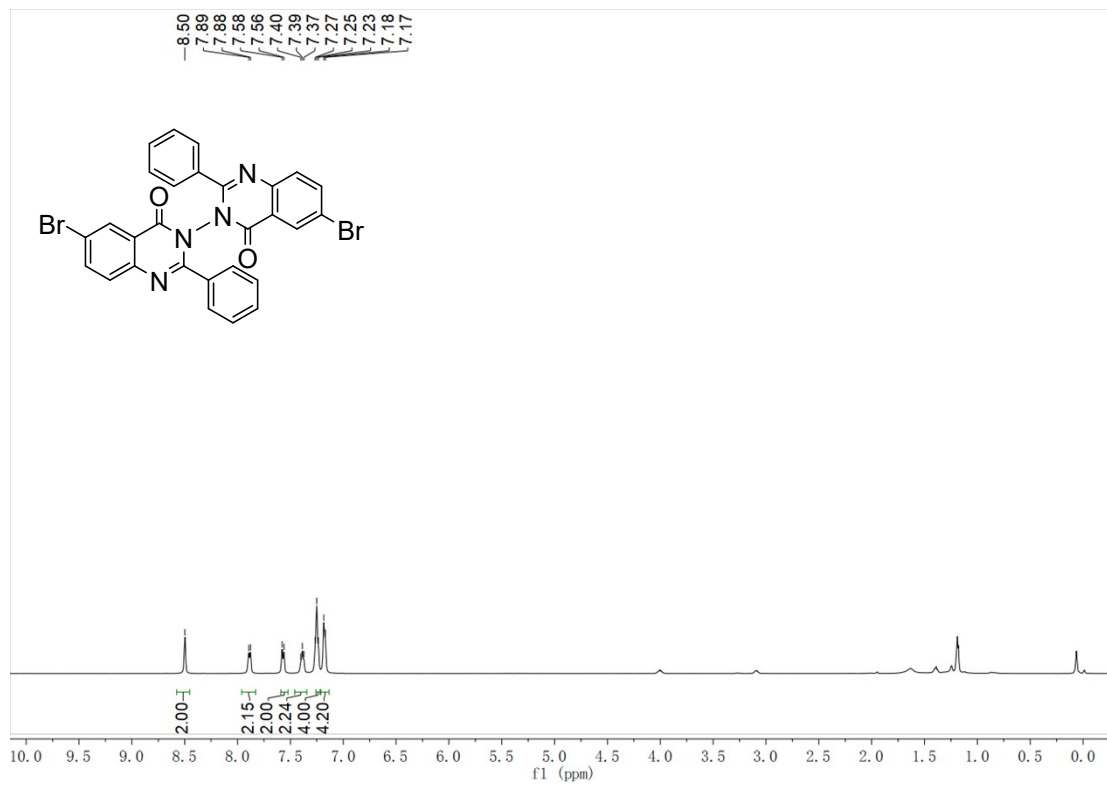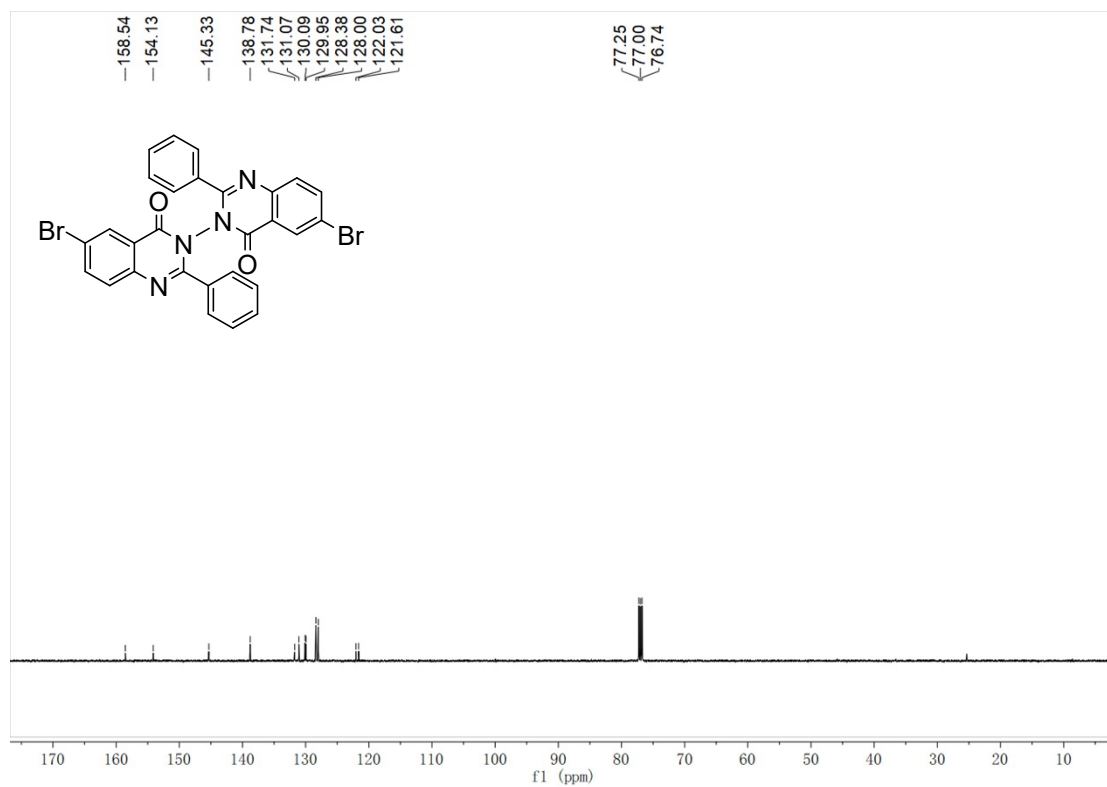

**(S)-6,6'-dimethyl-2,2'-diphenyl-4H,4'H-[3,3'-biquinazoline]-4,4'-dione (3ea)**

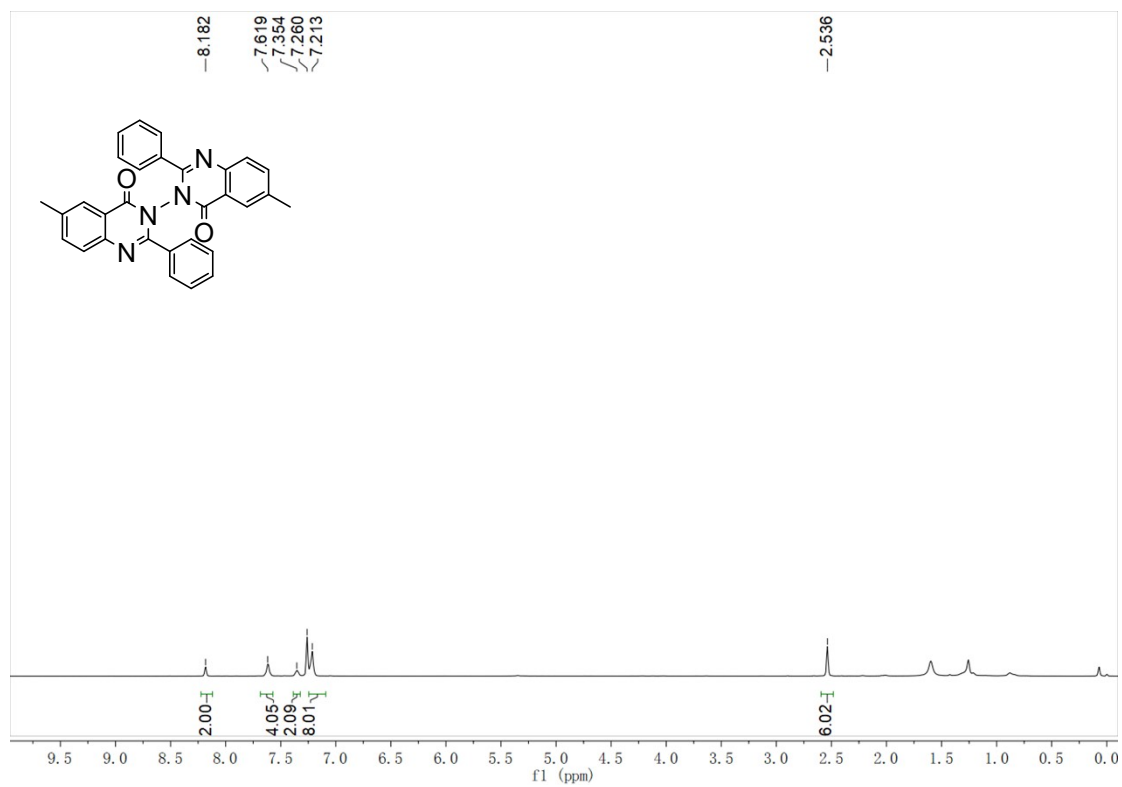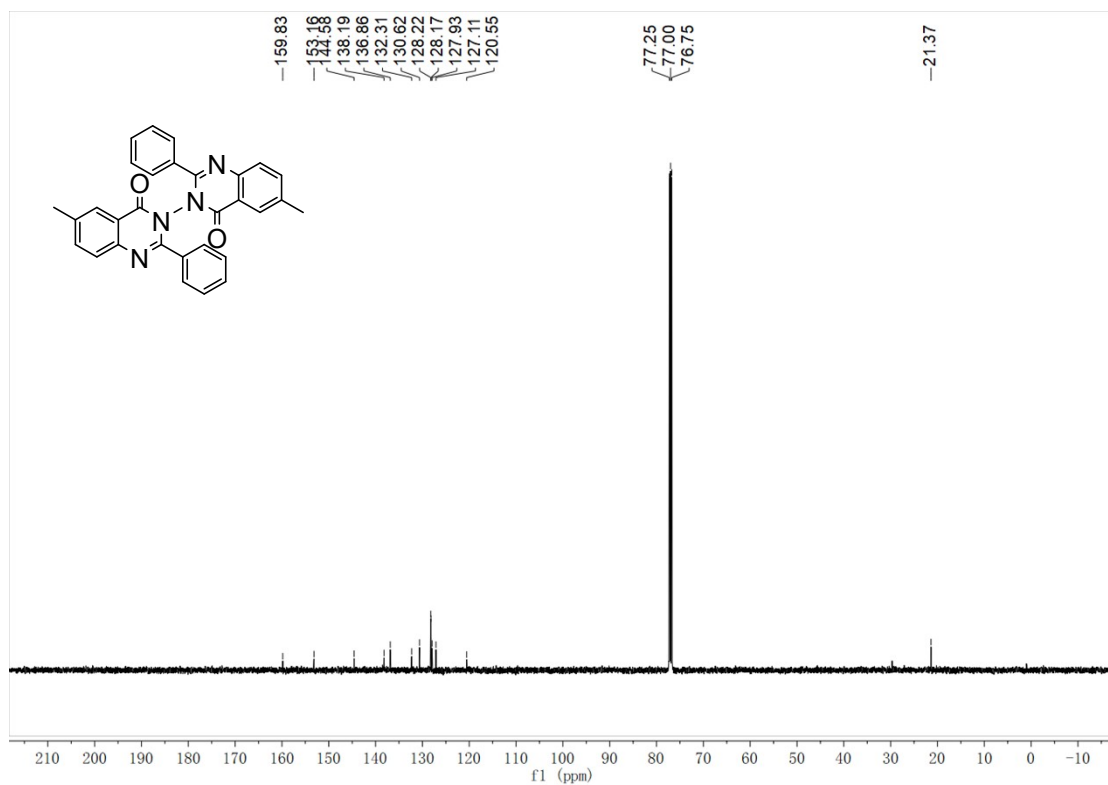

**(S)-7,7'-dichloro-2,2'-diphenyl-4*H*,4'*H*-[3,3'-biquinazoline]-4,4'-dione (3fa)**

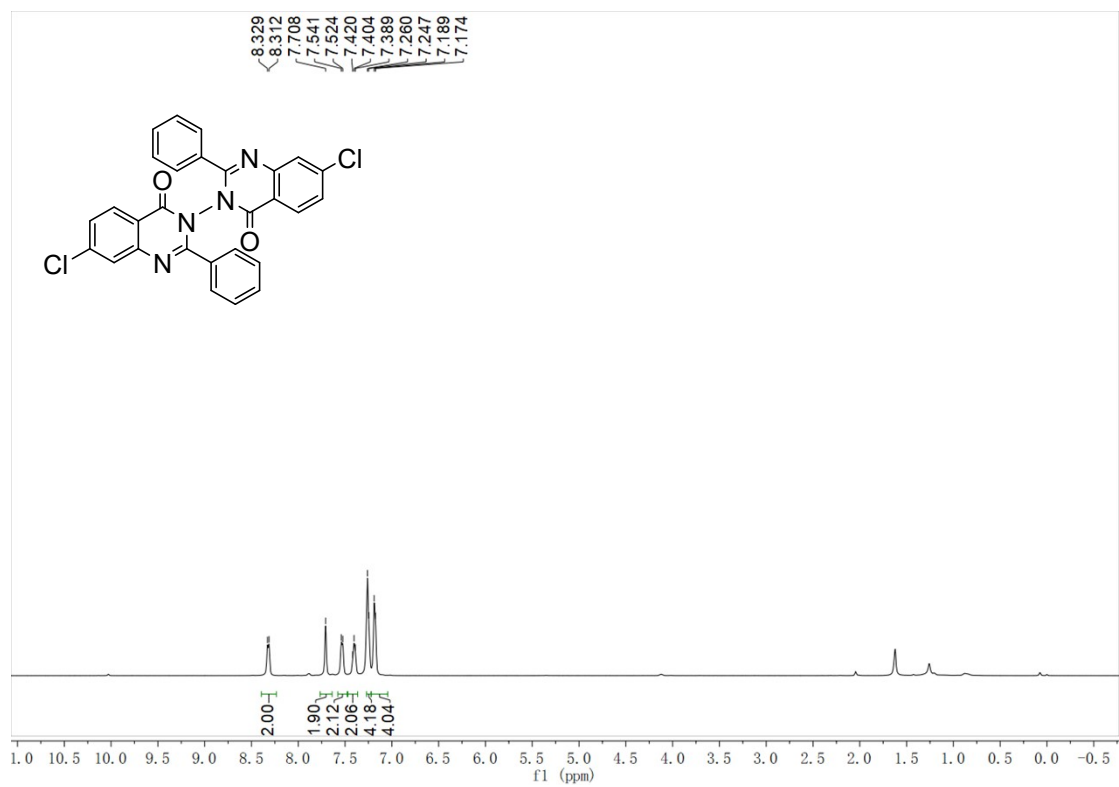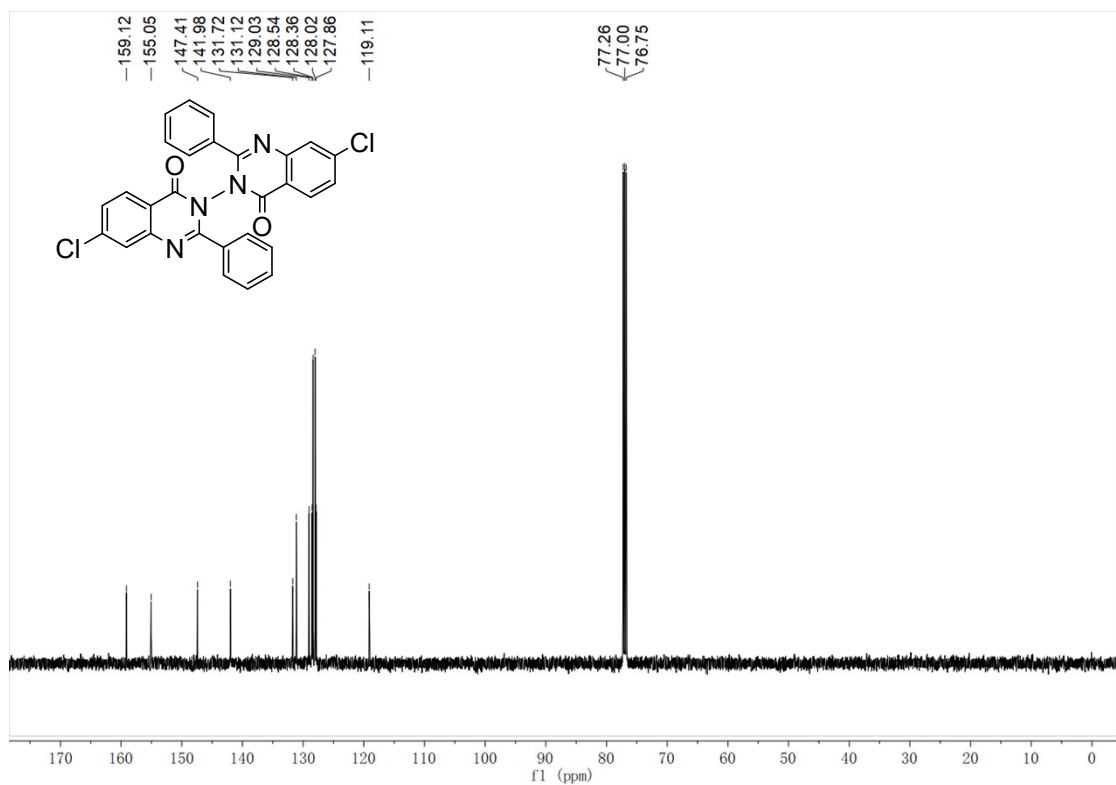

**(S)-2,2'-bis(4'-methyl-[1,1'-biphenyl]-4-yl)-4*H*,4'*H*-[3,3'-biquinazoline]-4,4'-dione (4)**

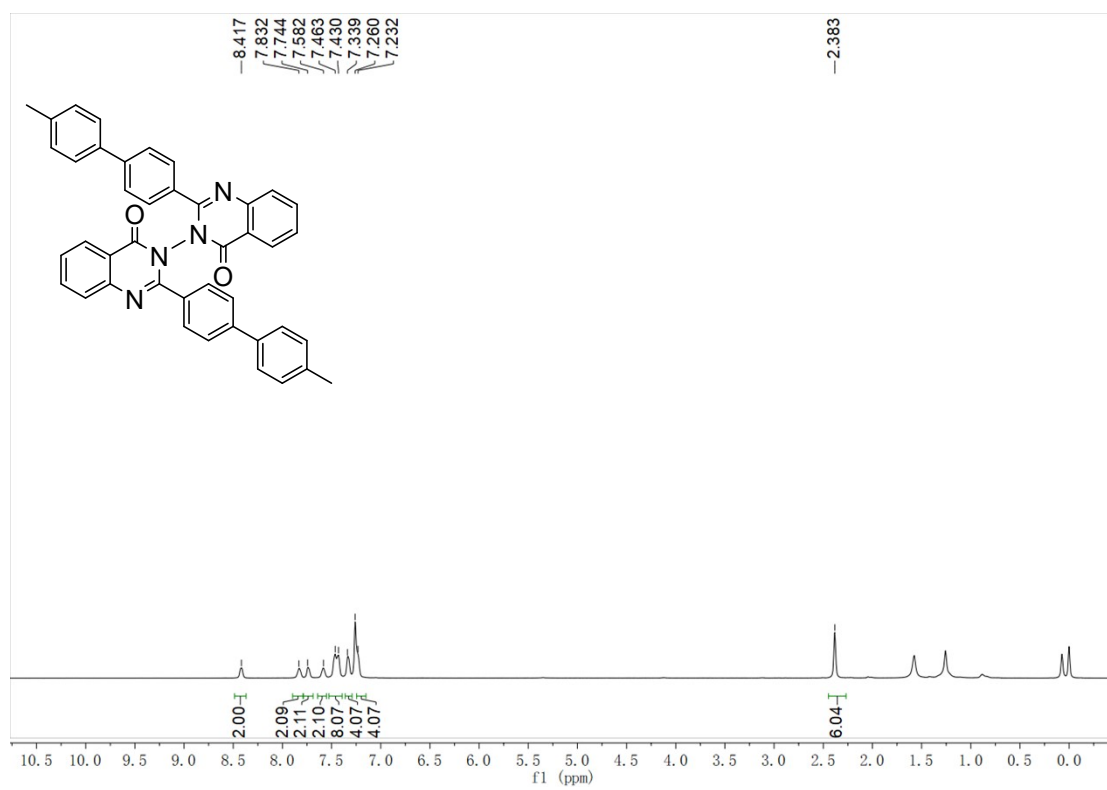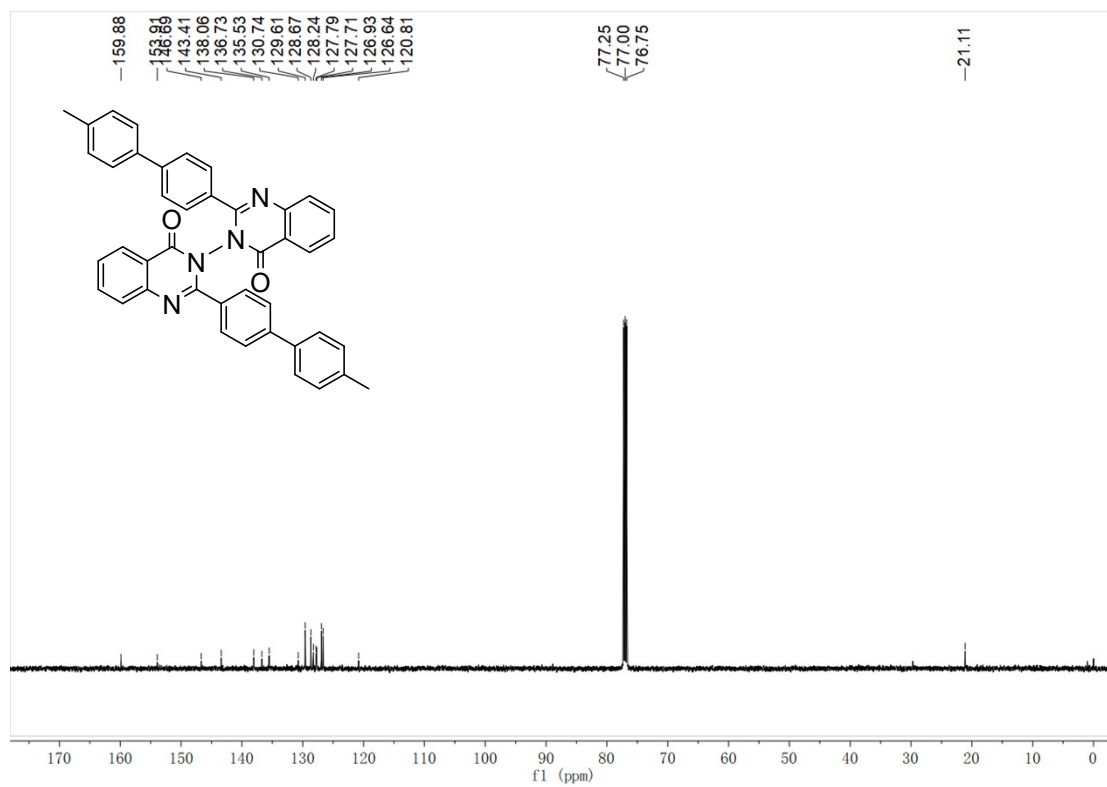



**(S)-2-(4-bromophenyl)-2'-(4-(p-tolylethynyl)phenyl)-4*H*,4'*H*-[3,3'-  
biquinazoline]-4,4'-dione (5)**

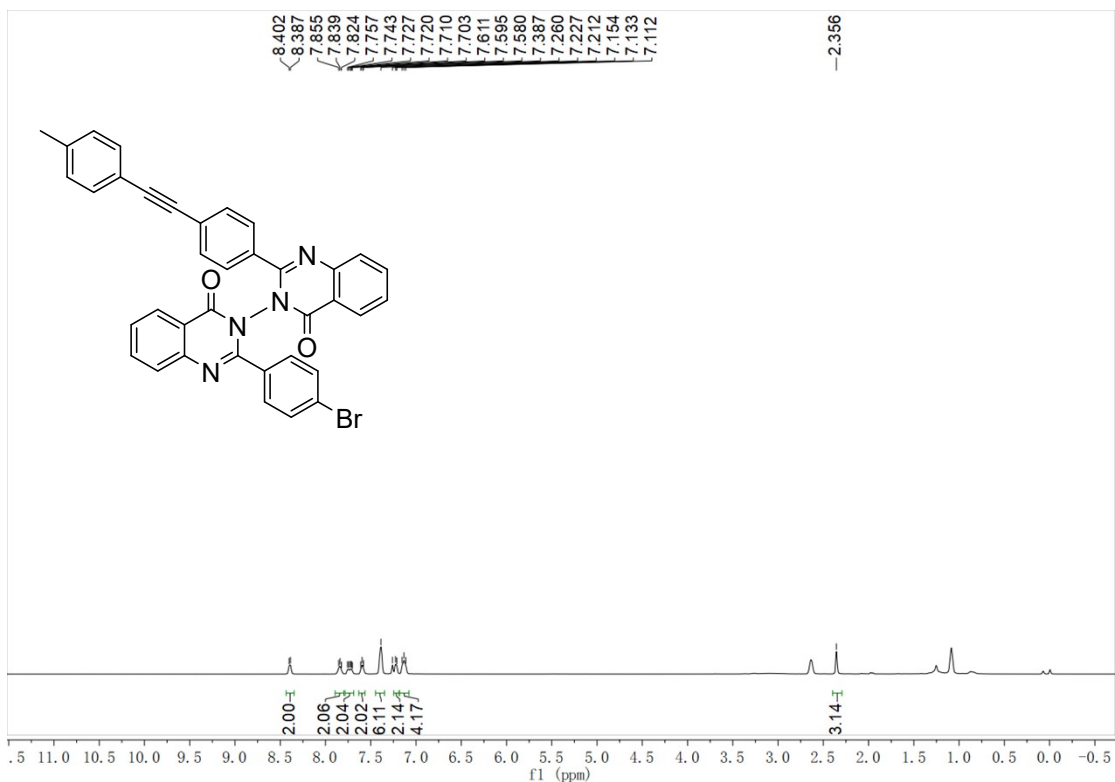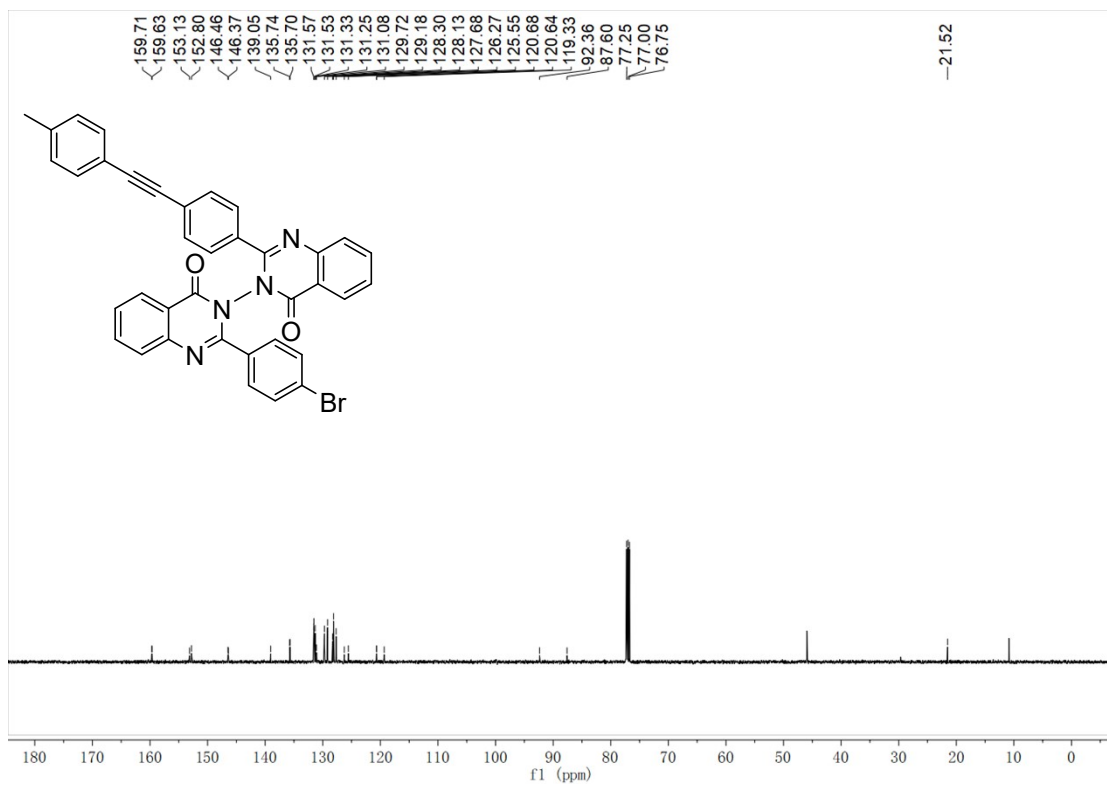

2-amino-N-(2-aminobenzoyl)benzohydrazide (1a)

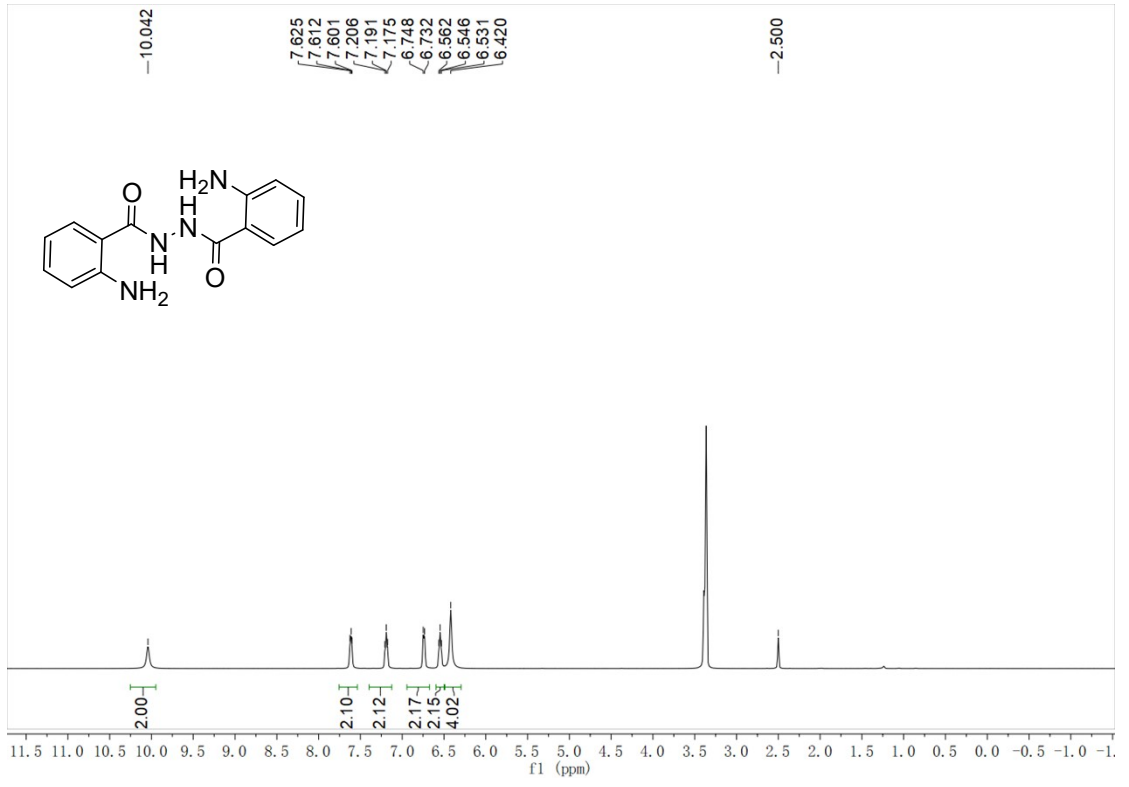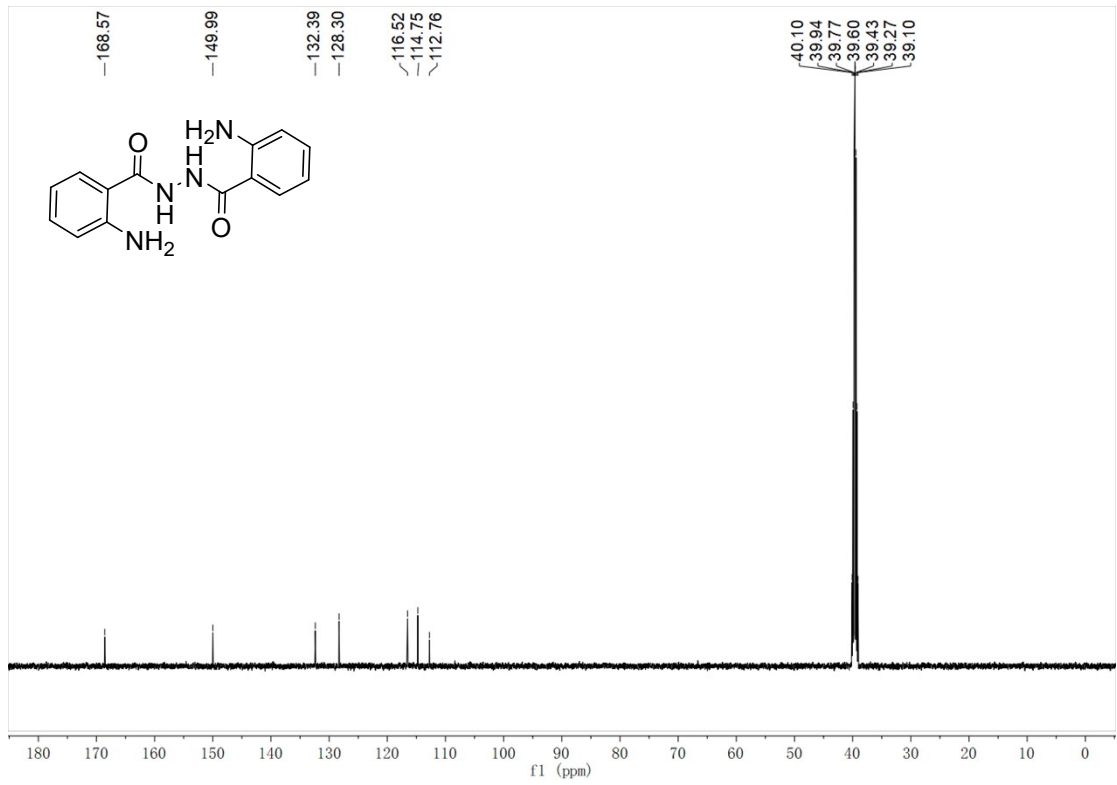

2-amino-N'-(2-amino-5-fluorobenzoyl)-5-fluorobenzohydrazide (1b)

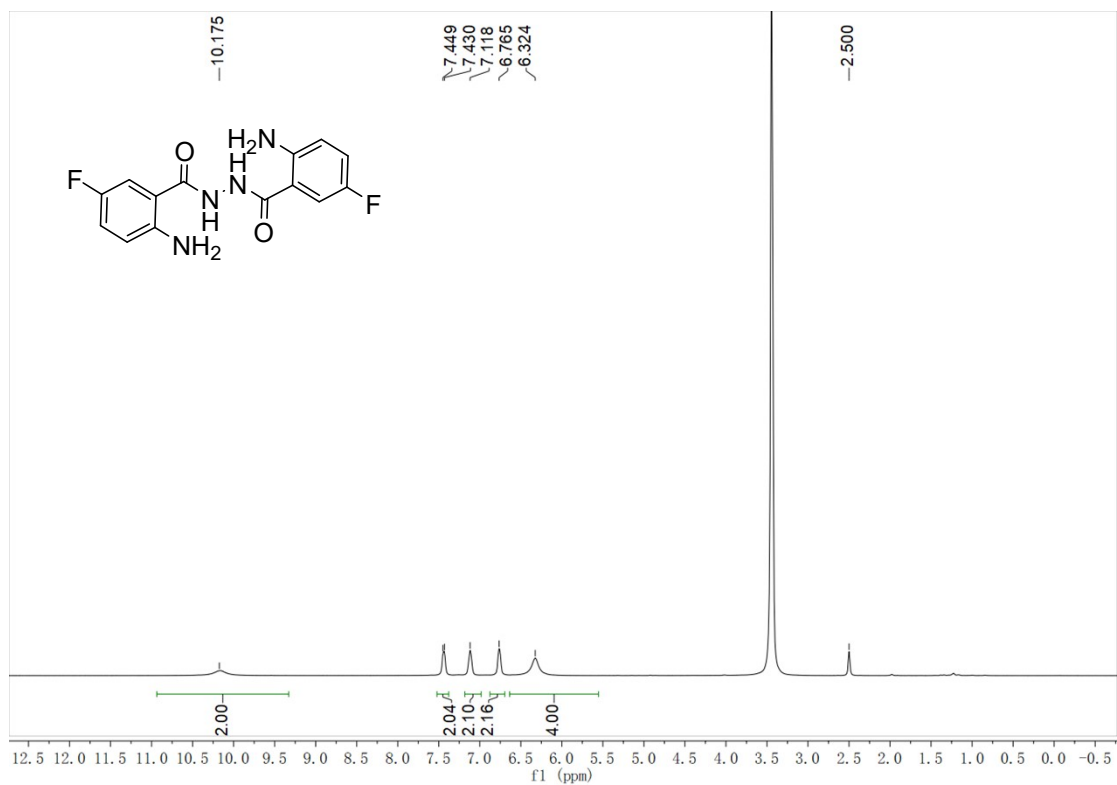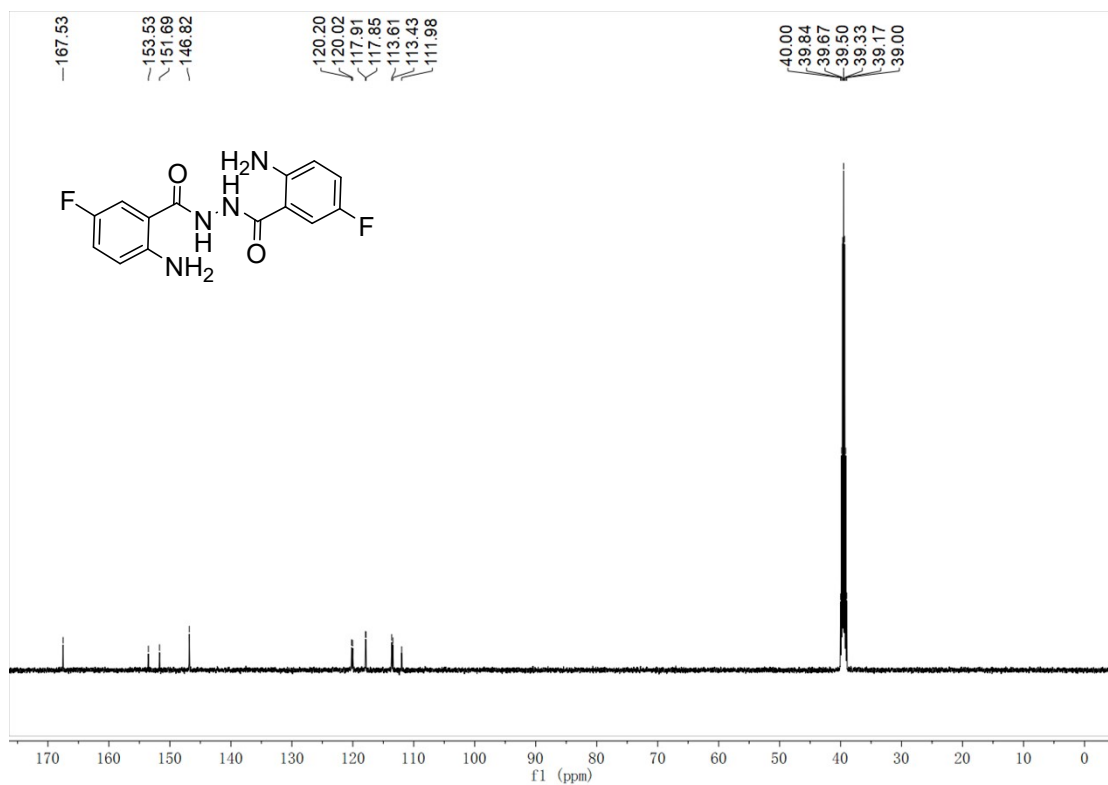

2-amino-N'-(2-amino-5-chlorobenzoyl)-5-chlorobenzohydrazide (1c)

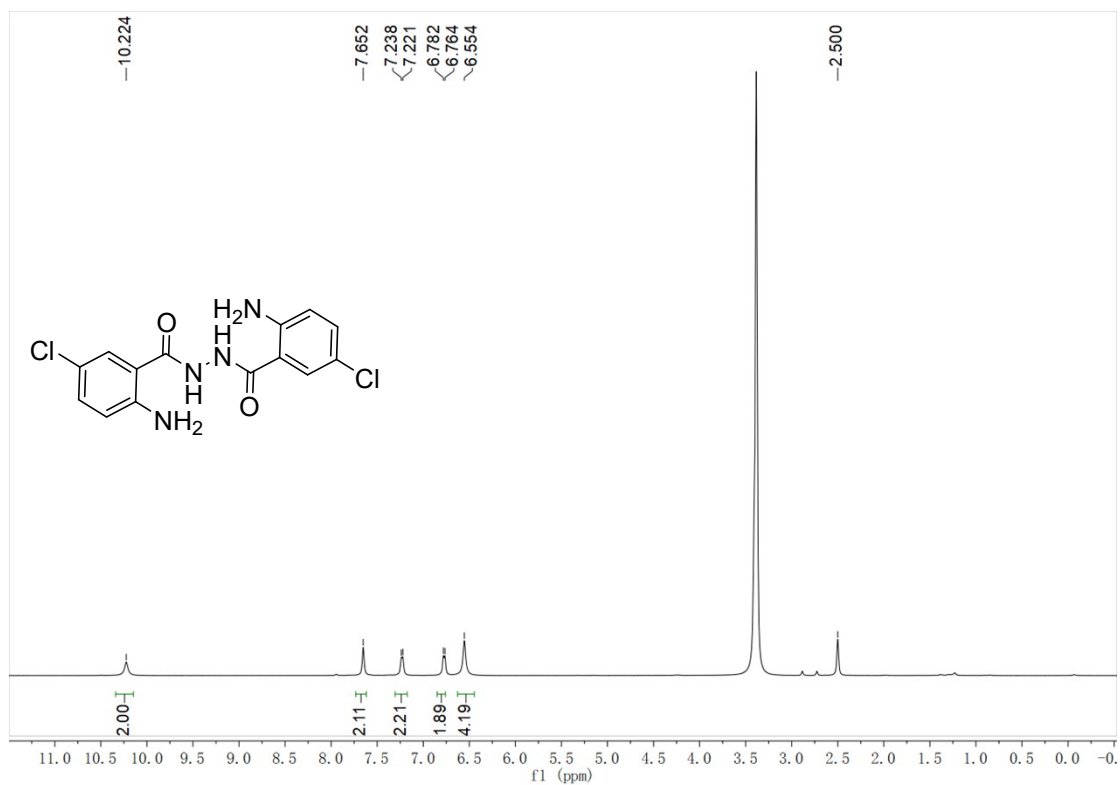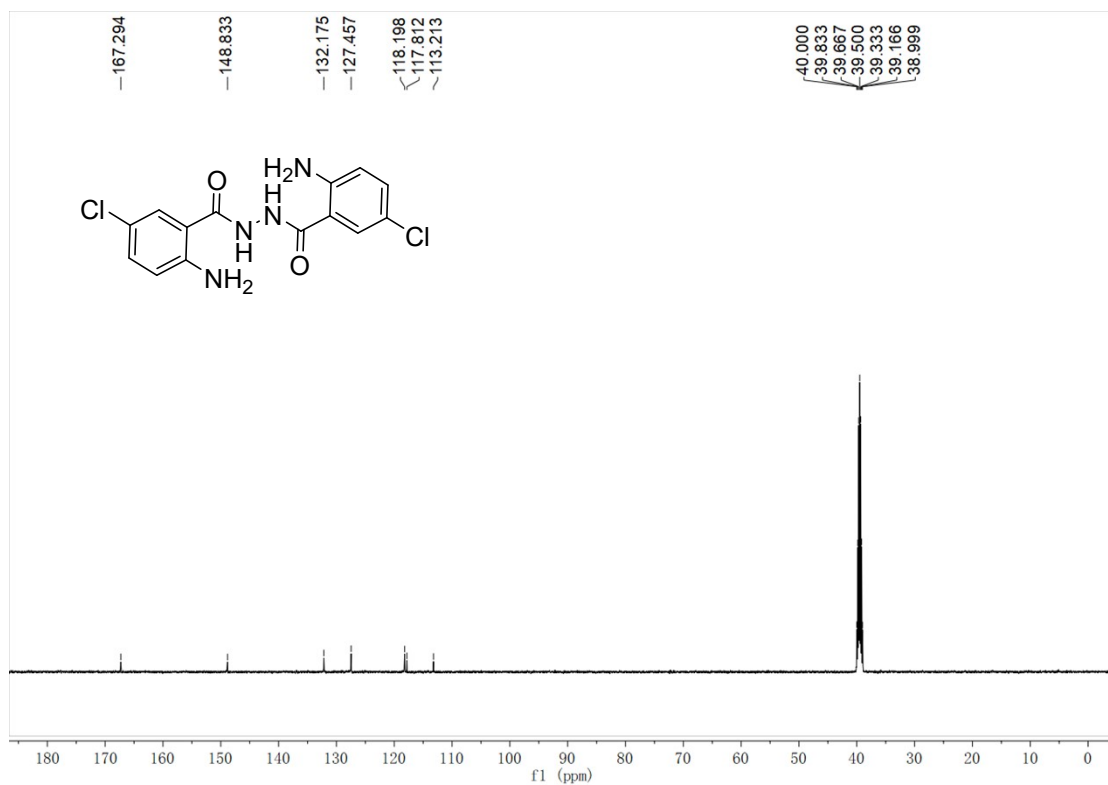

**2-amino-N<sup>1</sup>-(2-amino-5-bromobenzoyl)-5-bromobenzohydrazide (1d)**

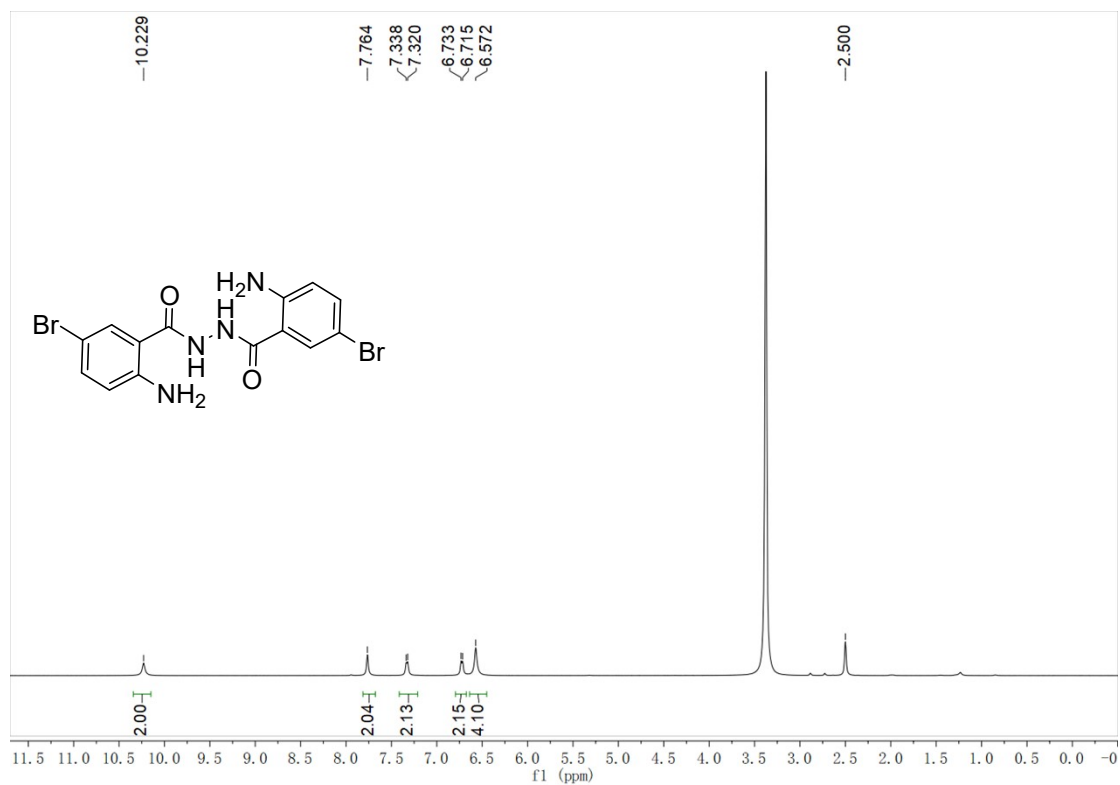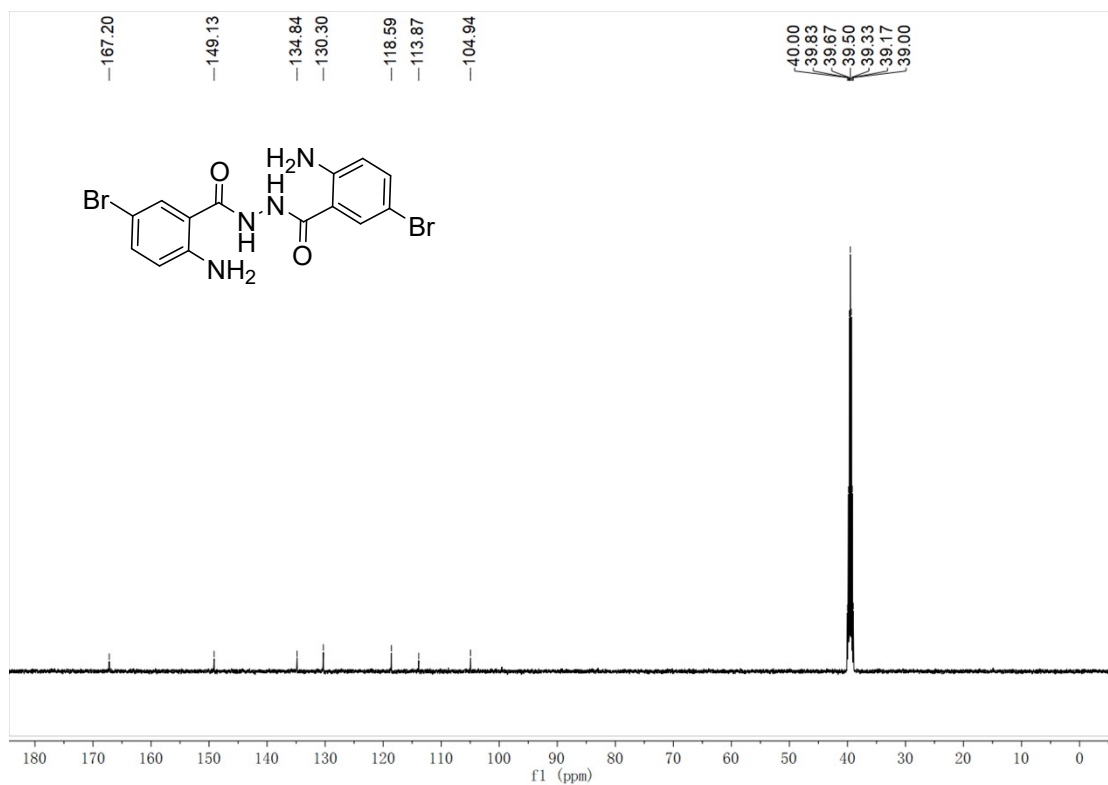

### 2-amino-N<sup>1</sup>-(2-amino-5-methylbenzoyl)-5-methylbenzohydrazide (1e)

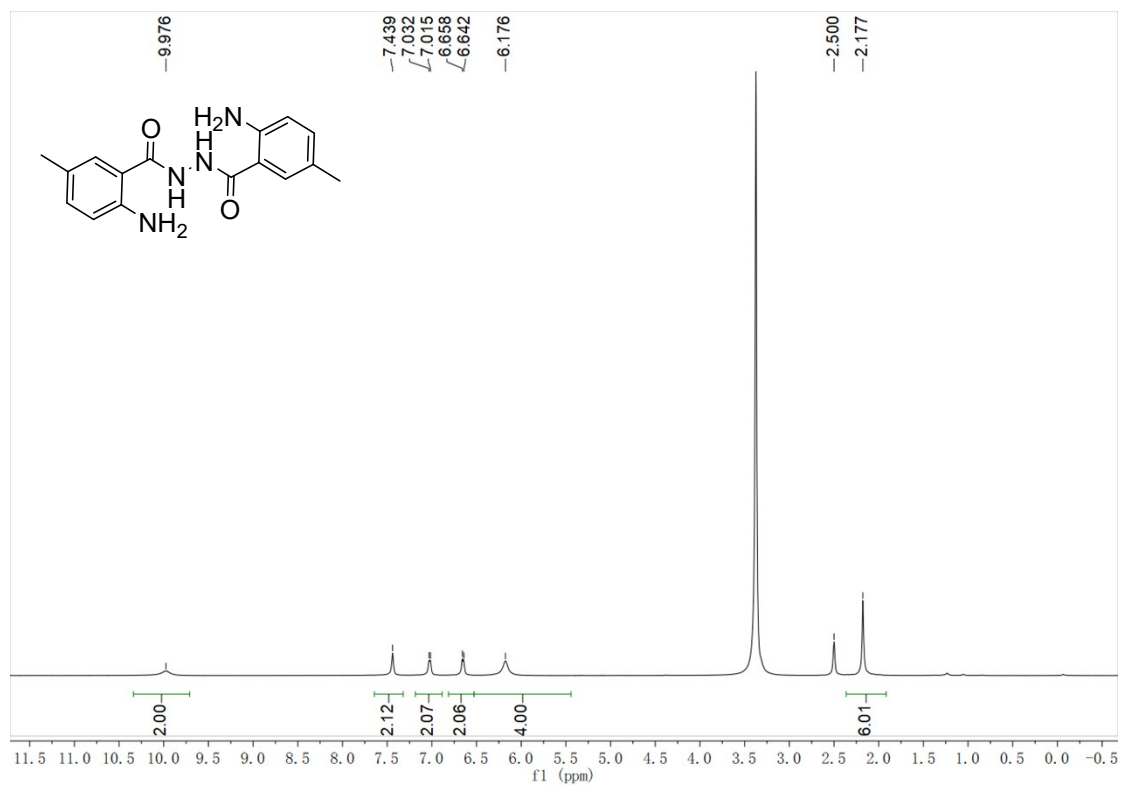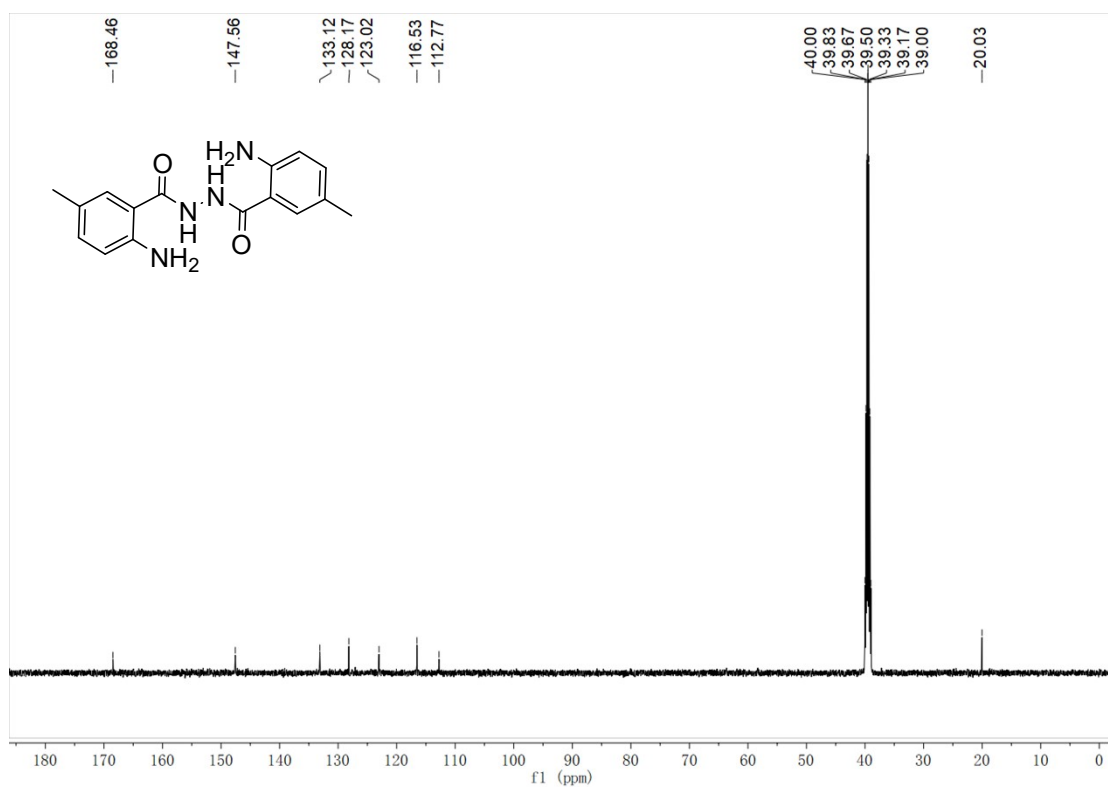

**2-amino-N'-(2-amino-4-chlorobenzoyl)-4-chlorobenzohydrazide (1f)**

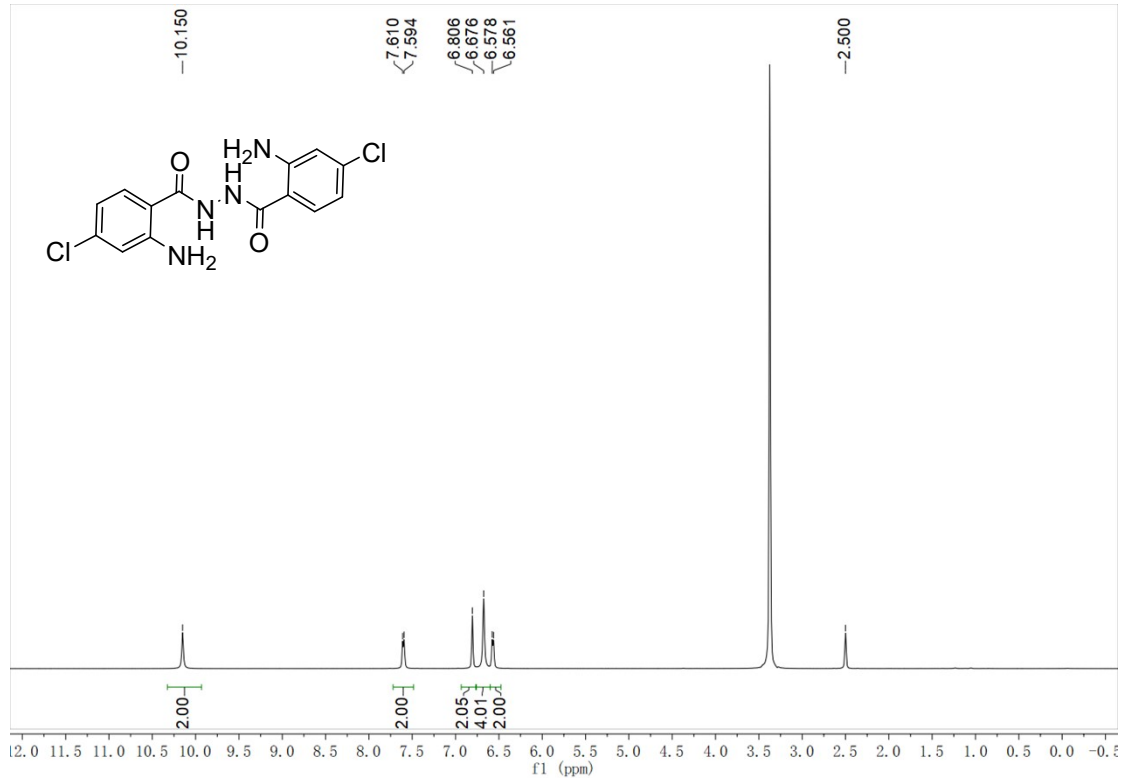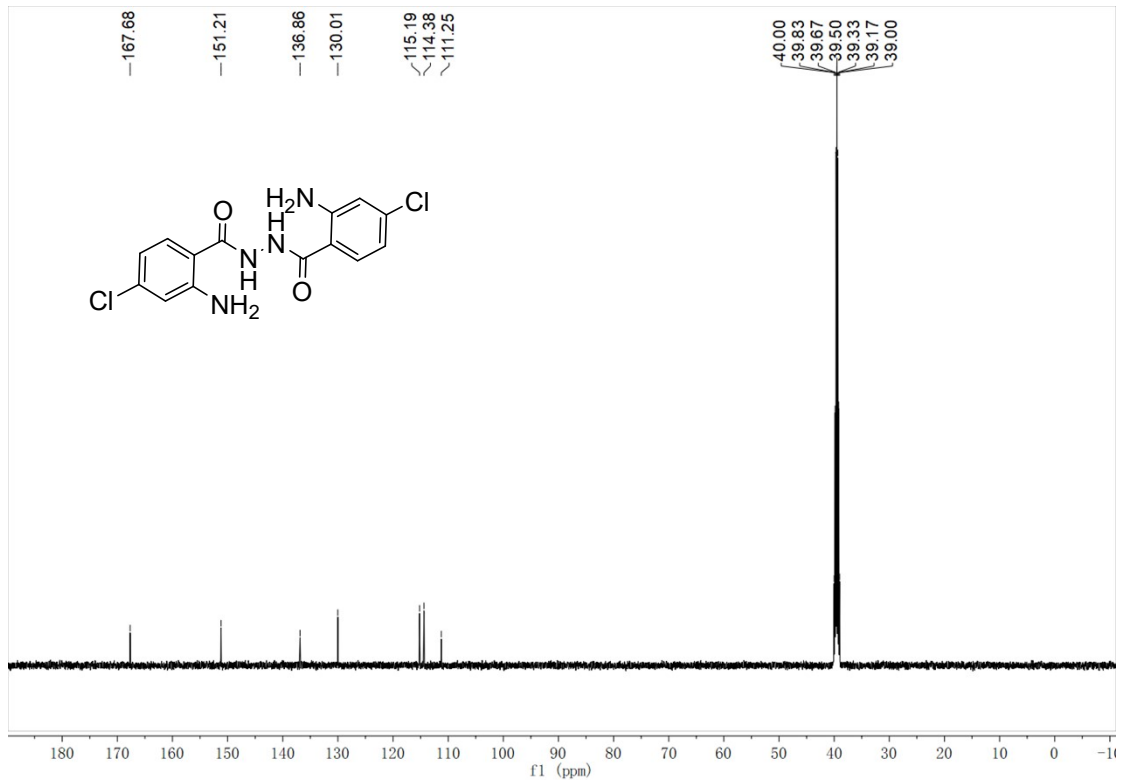

Supplement: d2cc05172a1.pdf [file d2cc05172a1.pdf]
